# Supplementary material for: Integrated analysis reveals microRNA networks coordinately expressed with key proteins in breast cancer
Source: PubMed Central journal article supplement (PMC4396592; doi:10.1186/s13073-015-0135-5), 2015-02-02

*ACACA*, cor=0.67

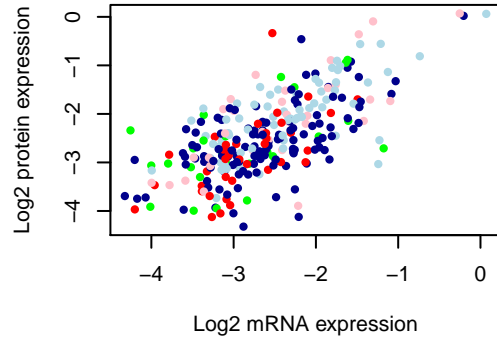

*AKT1*, cor=0.34

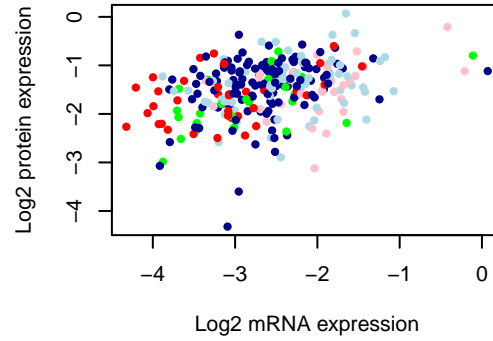

*AKT2*, cor=0.05

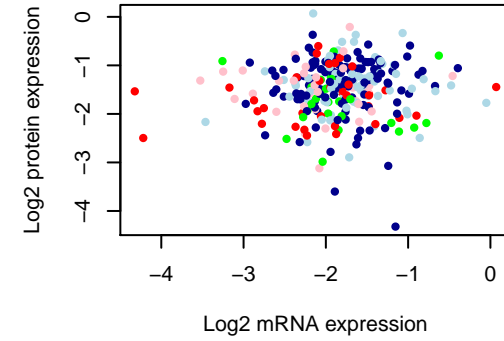

*AKT3*, cor=0

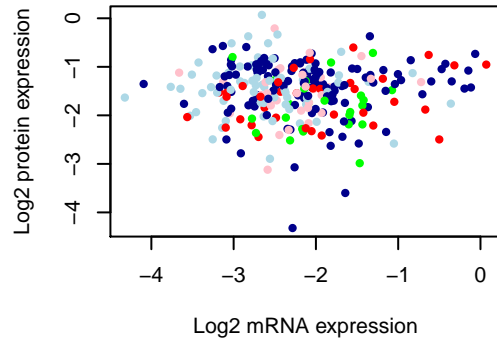

*ANXA1*, cor=0.6

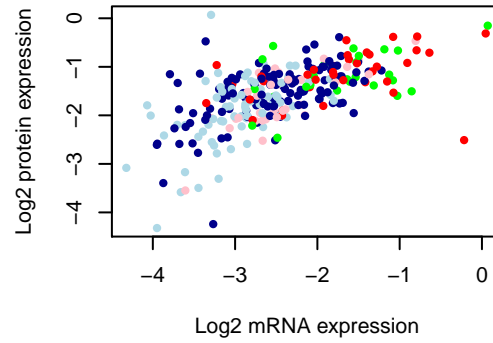

*AR*, cor=0.87

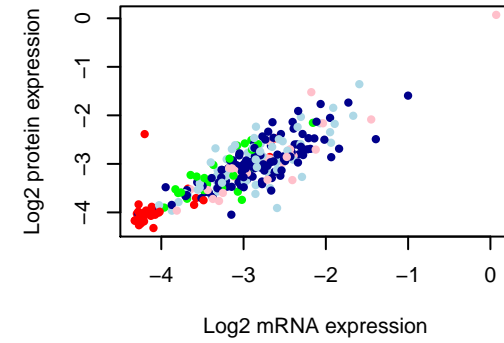

*BAK1*, cor=0.3

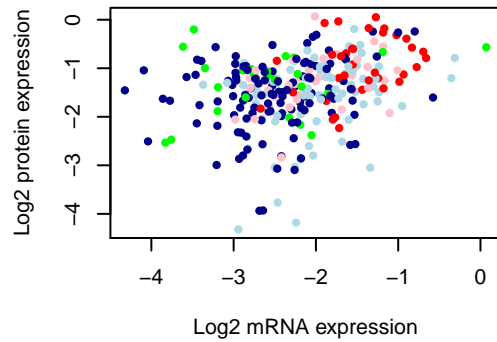

*BAX*, cor=0.29

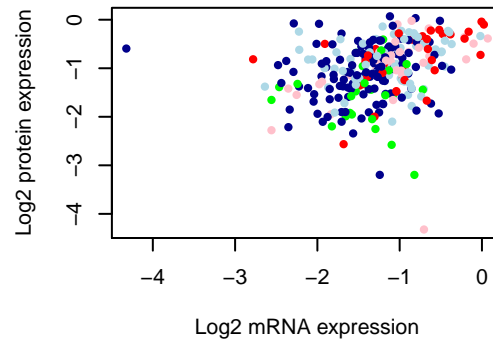

*BCL2*, cor=0.85

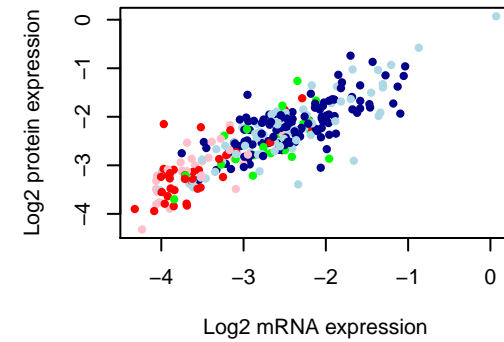

*BCL2L1*, cor=0.27

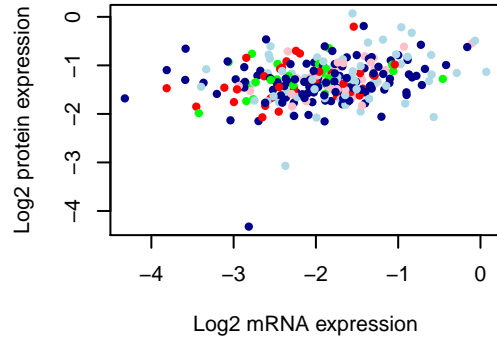

*BCL2L11*, cor=0.43

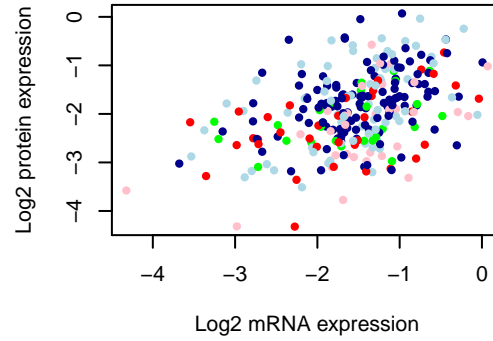

*BECN1*, cor=0.07

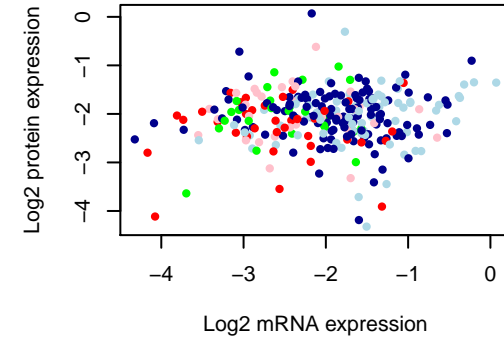

*BID*, cor=0.12

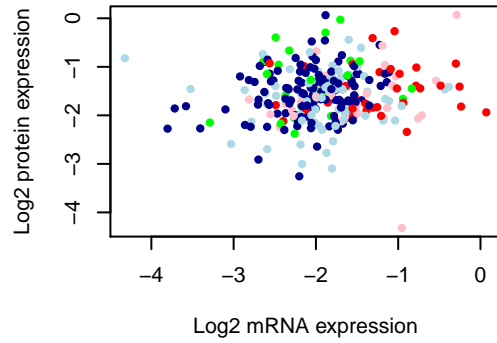

*BIRC2*, cor=0.14

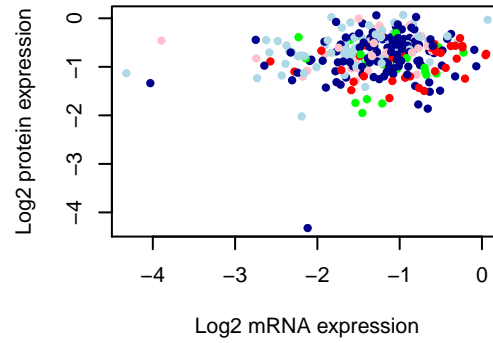

*BRAF*, cor=0.29

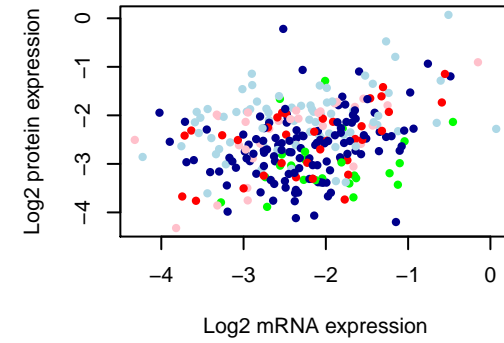

*CASP8*, cor=0.14

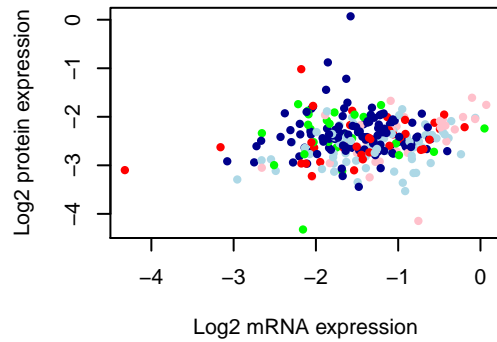

*CAV1*, cor=0.53

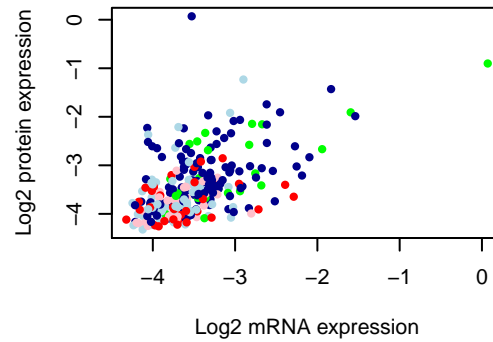

*CCNB1*, cor=0.78

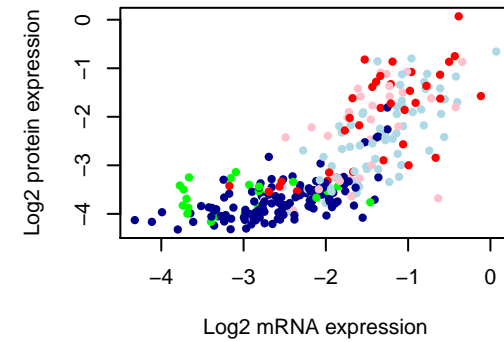

*CCND1*, cor=0.59

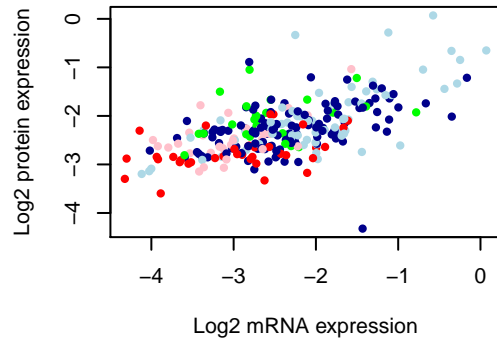

*CCNE1*, cor=0.74

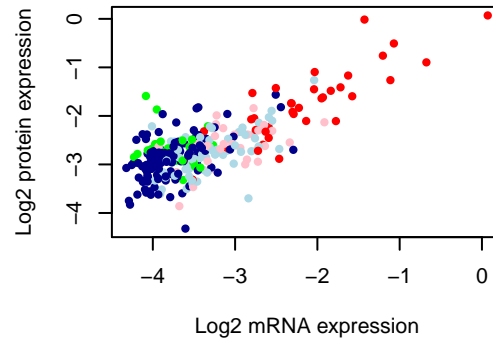

*CDH1*, cor=0.65

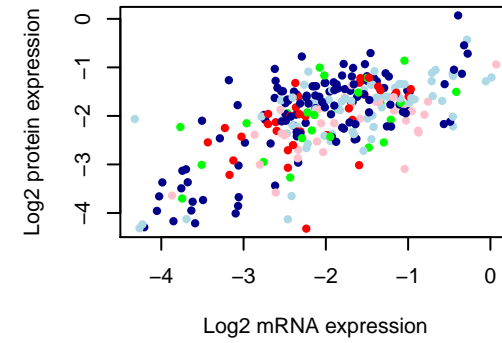

*CDH2*, cor=-0.02

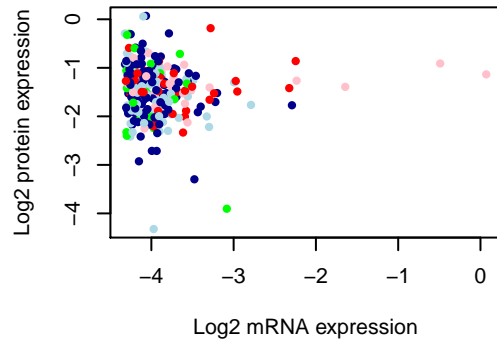

*CDH3*, cor=0.4

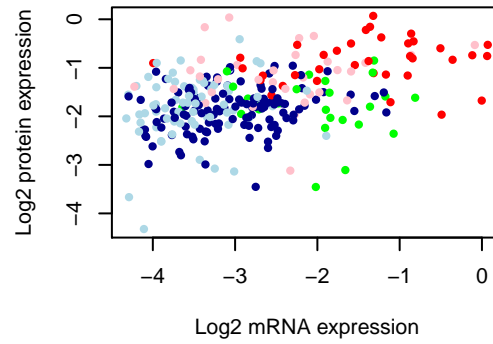

*CDK1*, cor=0.21

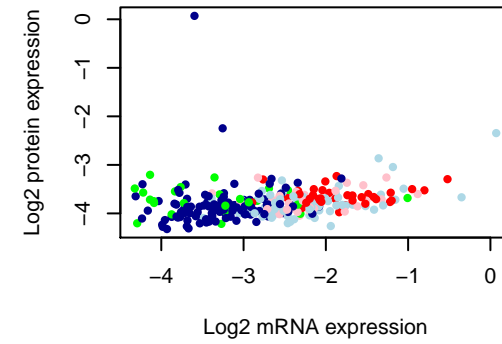

*CDKN1B*, cor=0.66

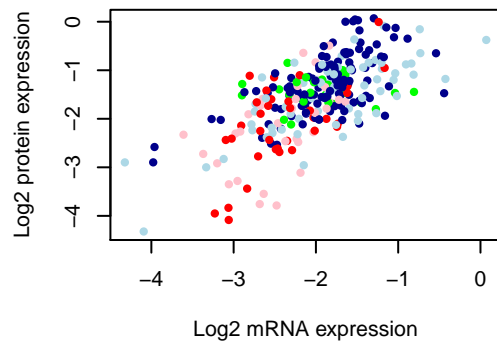

*CHEK1*, cor=0.11

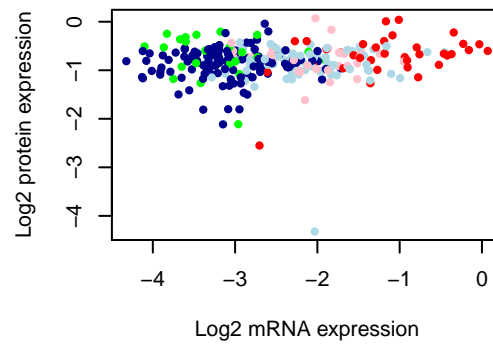

*CHEK2*, cor=0.69

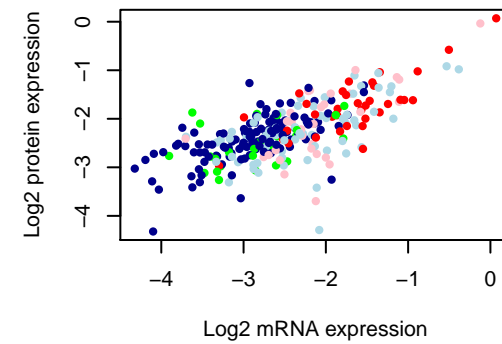

*CLDN7*, cor=0.47

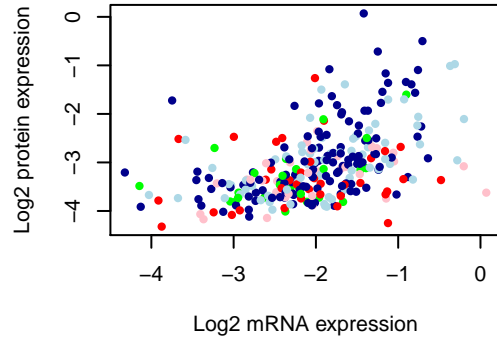

*COL6A1*, cor=-0.03

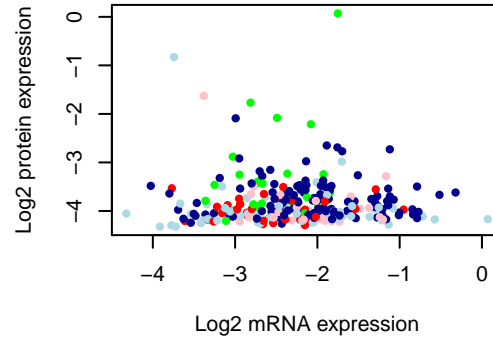

*CTNNA1*, cor=0.27

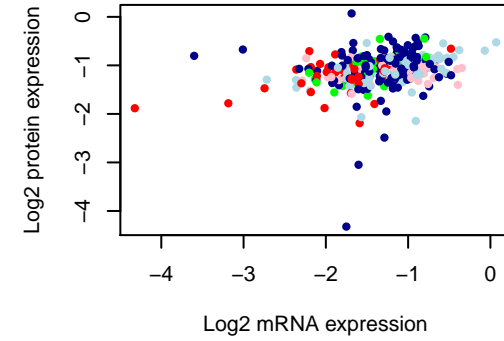

*CTNNB1*, cor=0.04

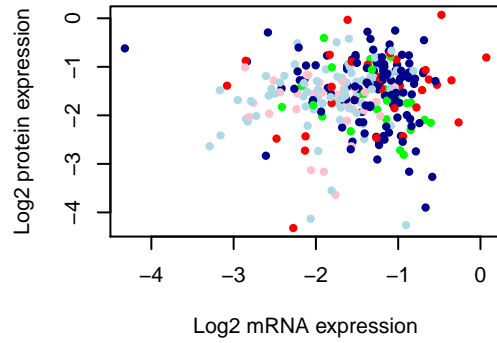

*DIABLO*, cor=0.27

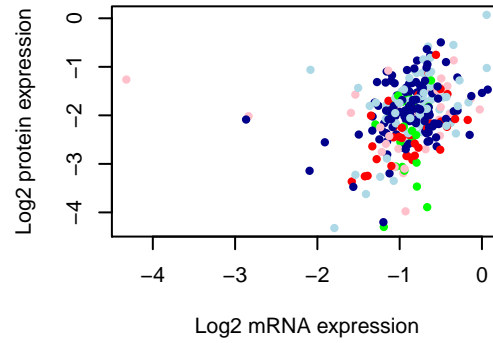

*DVL3*, cor=0.26

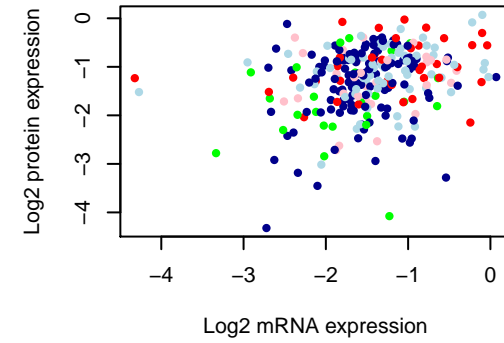

*EEF2*, cor=-0.1

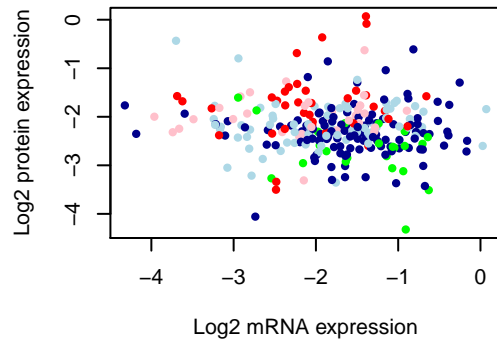

*EEF2K*, cor=0.55

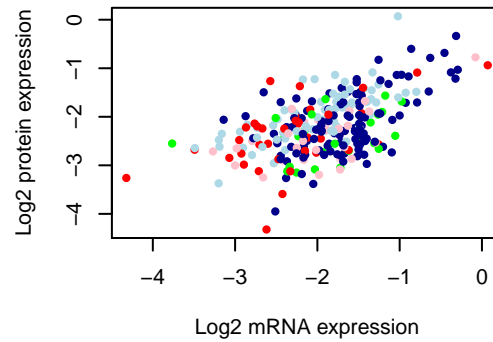

*EGFR*, cor=0.39

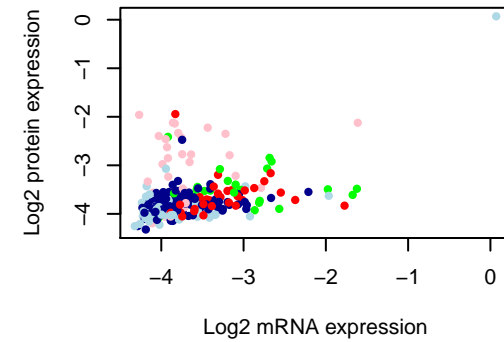

*EIF4E*, cor=0.25

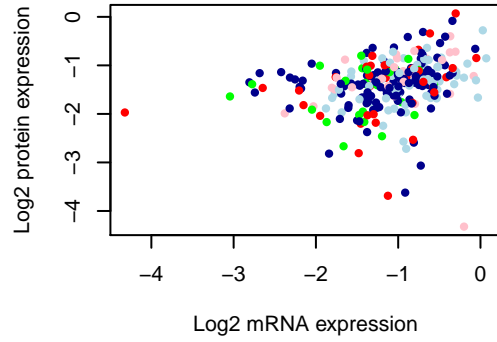

*EIF4EBP1*, cor=0.68

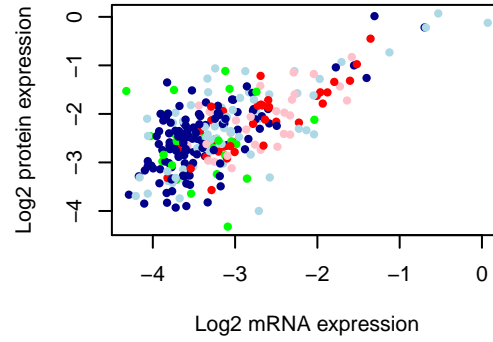

*ERBB2*, cor=0.87

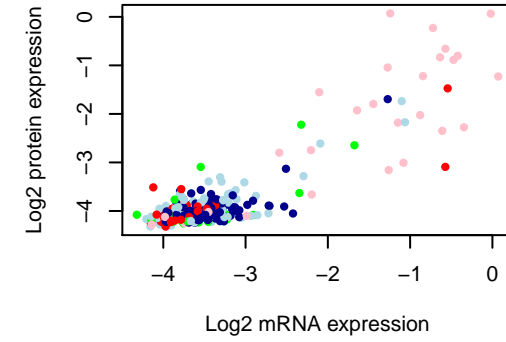

*ERBB3*, cor=0.46

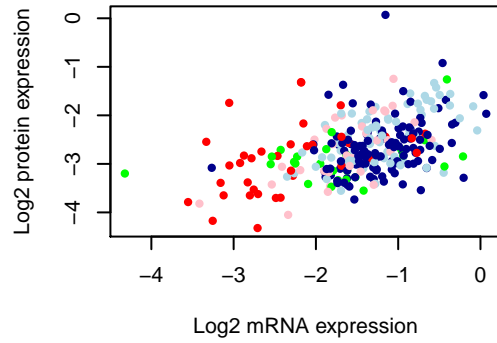

*ERCC1*, cor=-0.07

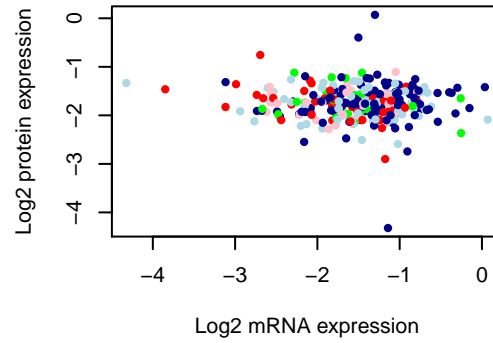

*ERRFI1*, cor=0.13

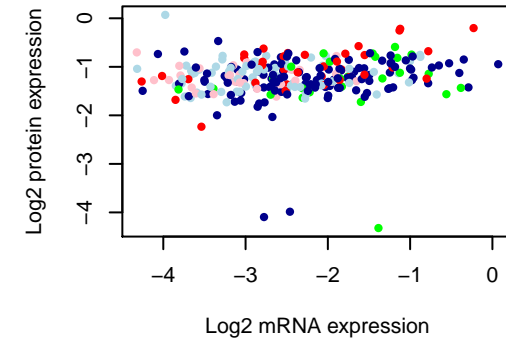

*ESR1*, cor=0.87

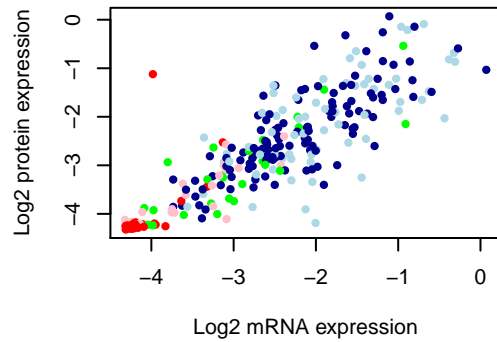

*FN1*, cor=0.68

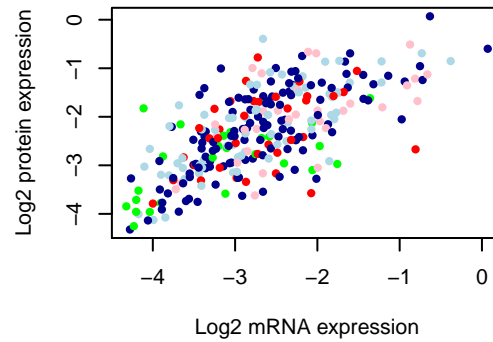

*FOXO3*, cor=0.32

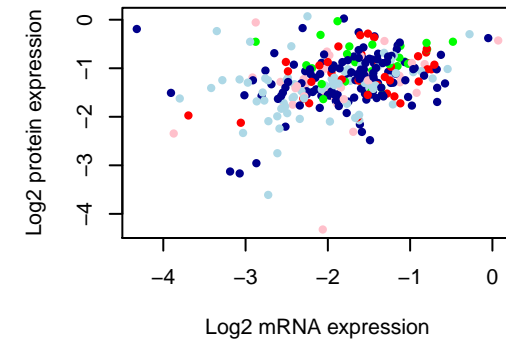

*GAB2*, cor=0.78

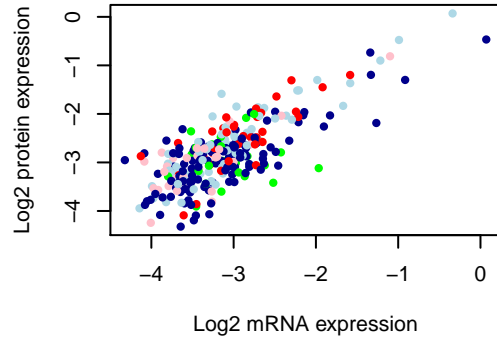

*GATA3*, cor=0.84

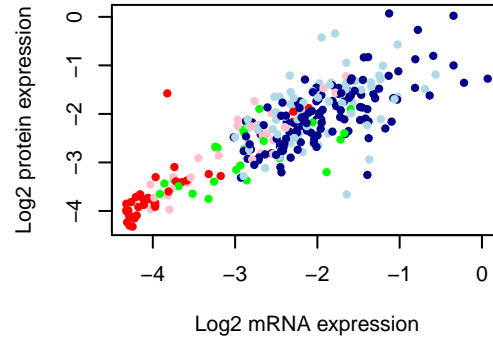

*GSK3A*, cor=0.29

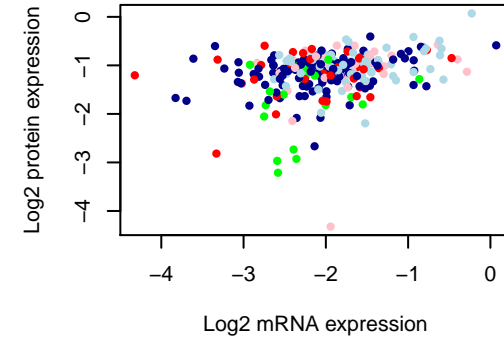

*GSK3B*, cor=0.2

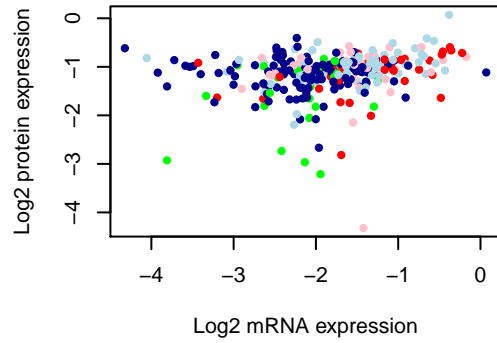

*IGF1R*, cor=0.83

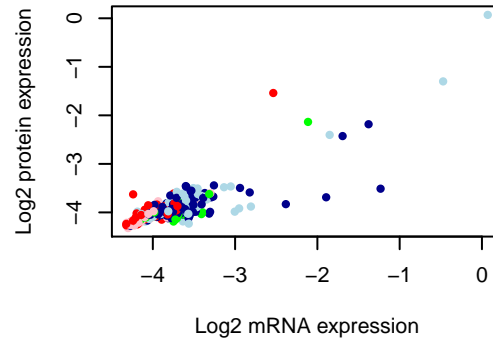

*IGFBP2*, cor=0.76

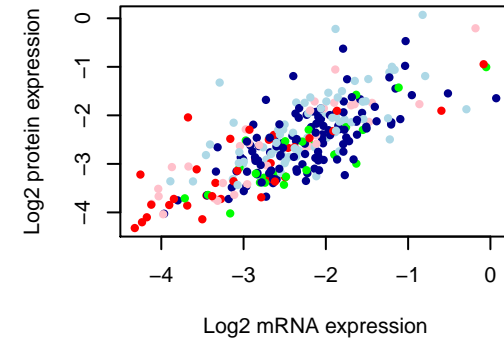

*INPP4B*, cor=0.86

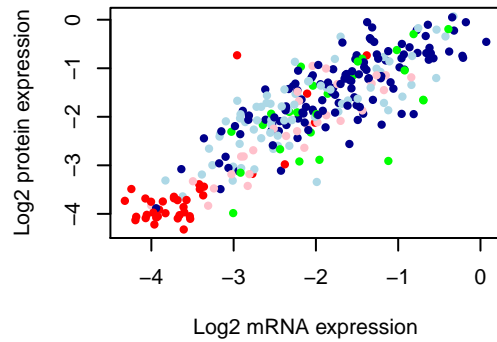

*IRS1*, cor=0.63

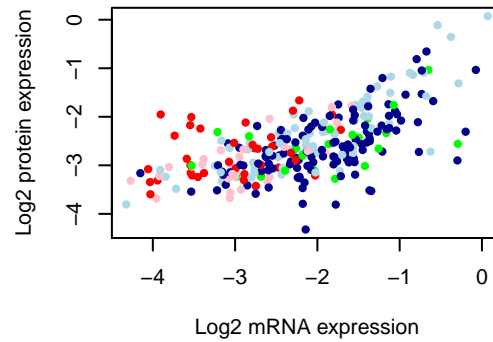

*KDR*, cor=-0.02

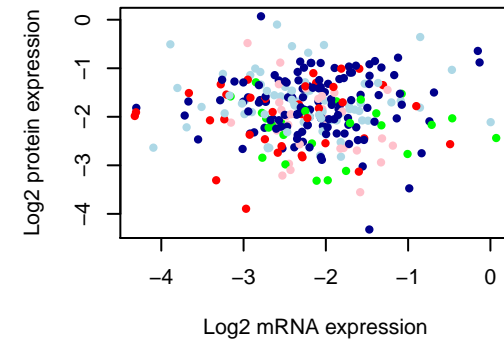

*KIT*, cor=0.76

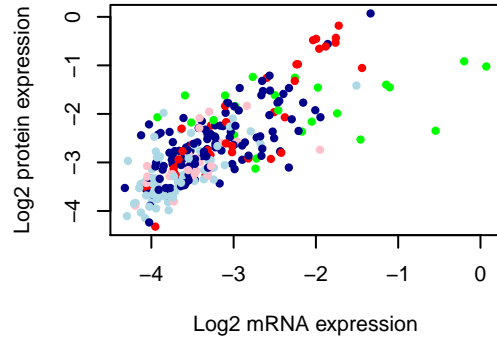

*KRAS*, cor=-0.19

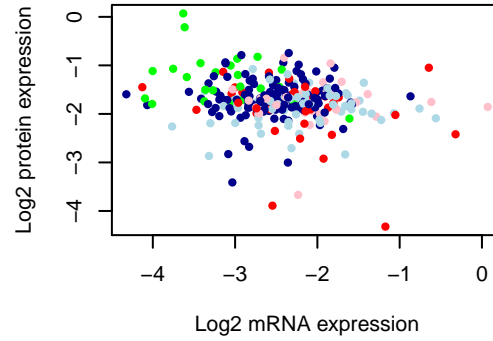

*MAP2K1*, cor=-0.08

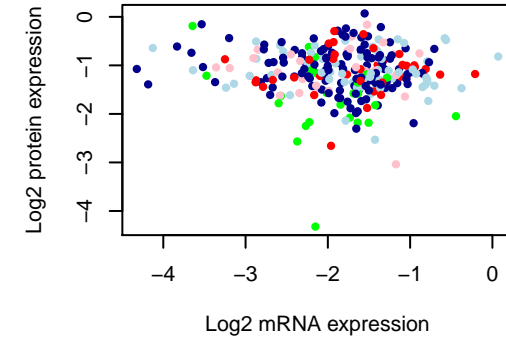

*MAPK14*, cor=0.12

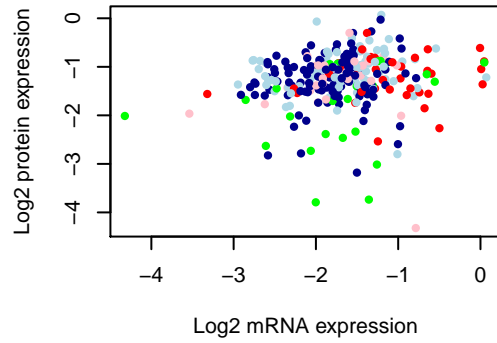

*MAPK9*, cor=0.44

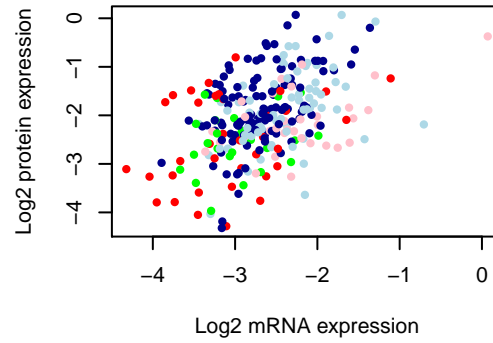

*MAPT*, cor=0.13

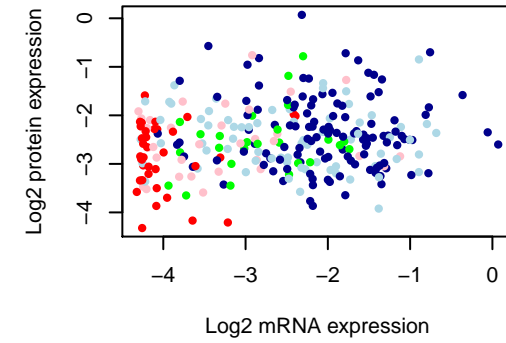

*MET*, cor=0.18

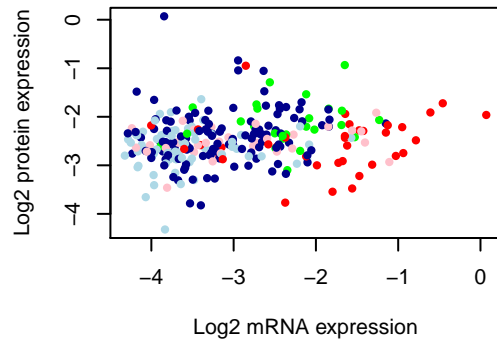

*MRE11A*, cor=0.08

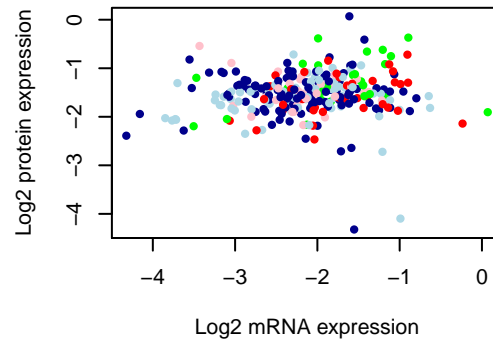

*MSH2*, cor=0.53

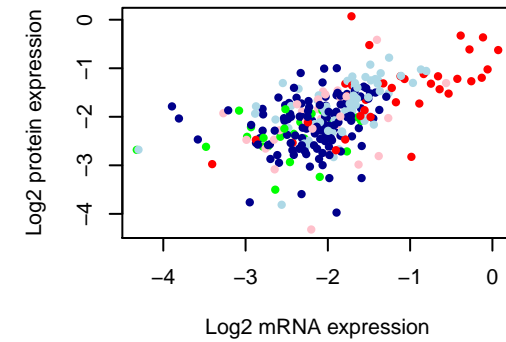

*MSH6*, cor=0.53

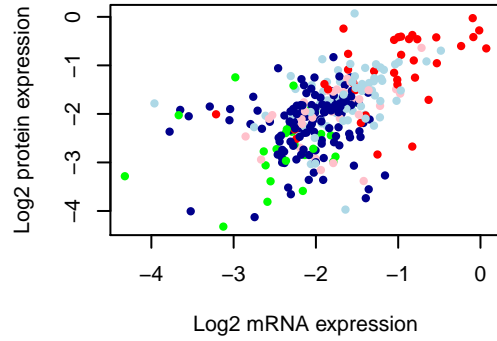

*MYC*, cor=0.18

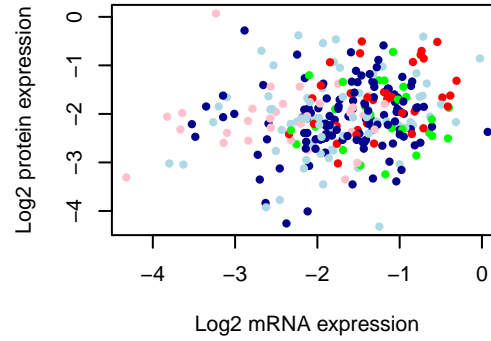

*NCOA3*, cor=0.34

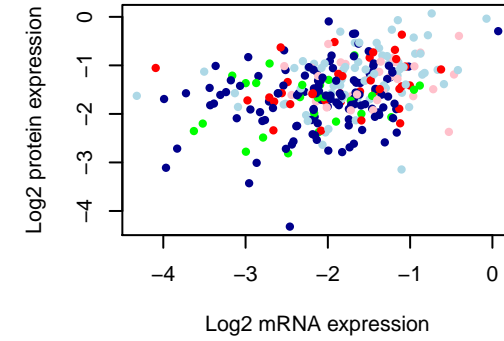

*NF2*, cor=0.31

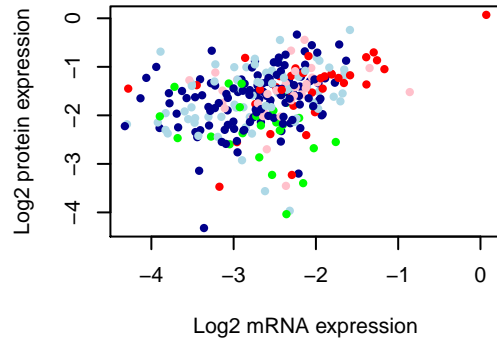

*NOTCH1*, cor=0.39

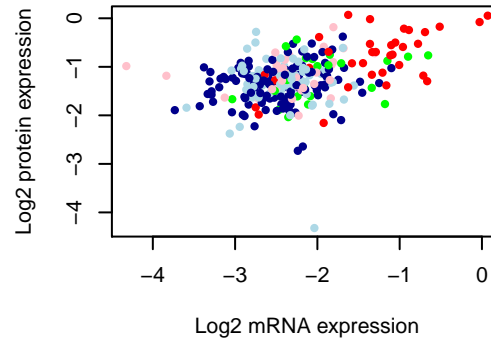

*NOTCH3*, cor=0.4

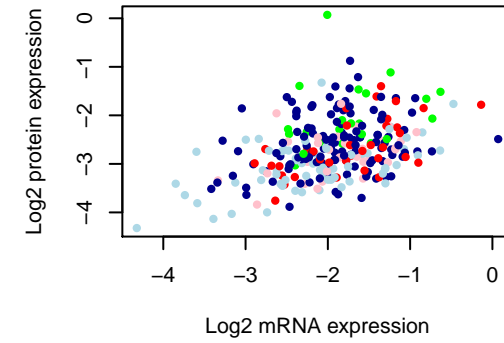

*PARK7*, cor=0.53

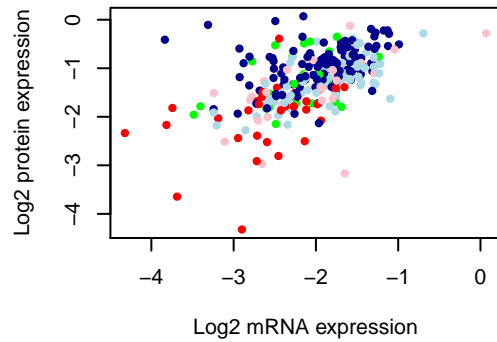

*PCNA*, cor=0.47

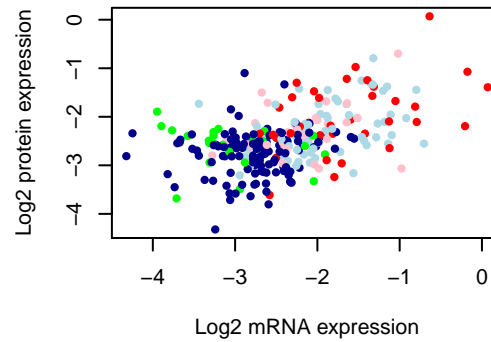

*PECAM1*, cor=0.21

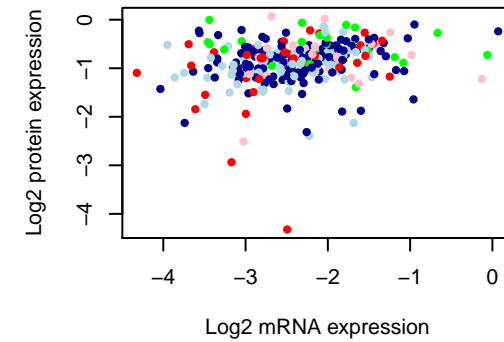



*PGR*, cor=0.87

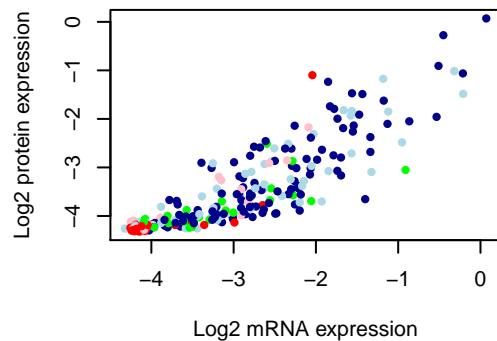

*PIK3CA*, cor=0.24

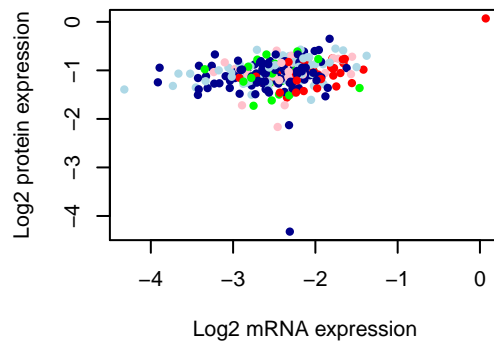

*PIK3R1*, cor=0.27

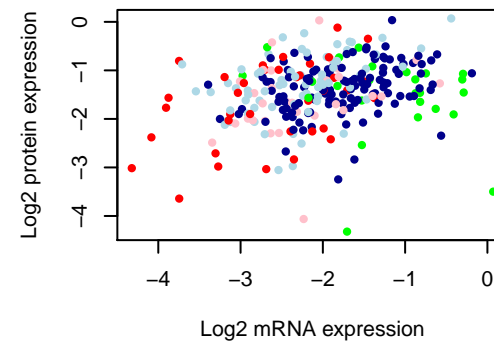

*PRKCA*, cor=0.56

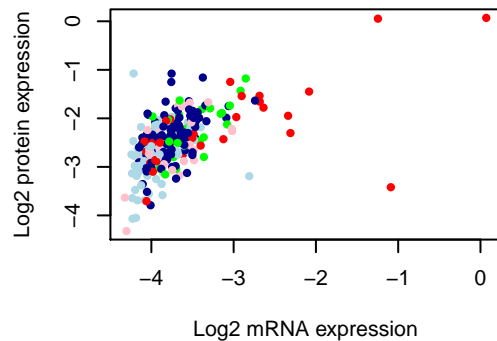

*PRKAA1*, cor=0.37

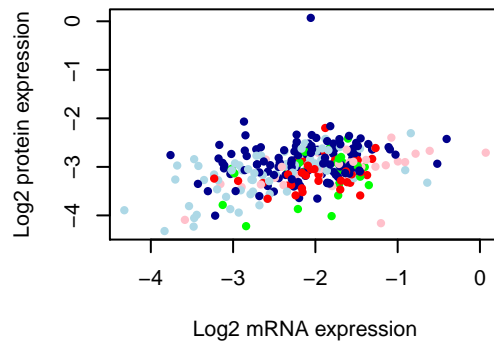

*PTCH1*, cor=0.21

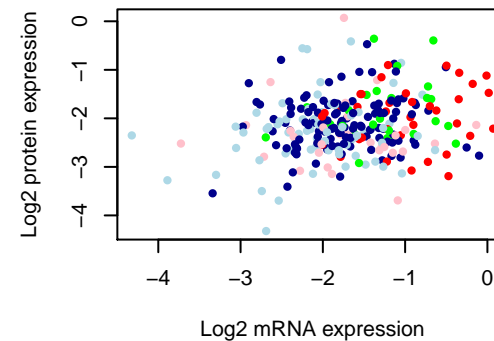

*PTEN*, cor=0.17

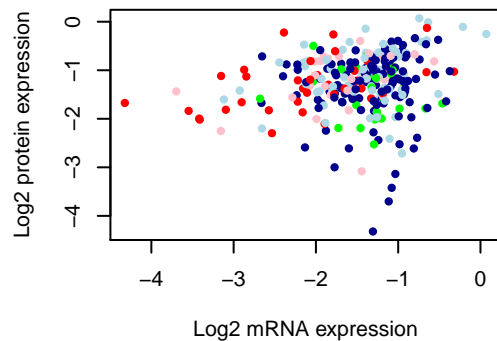

*PTGS2*, cor=0.28

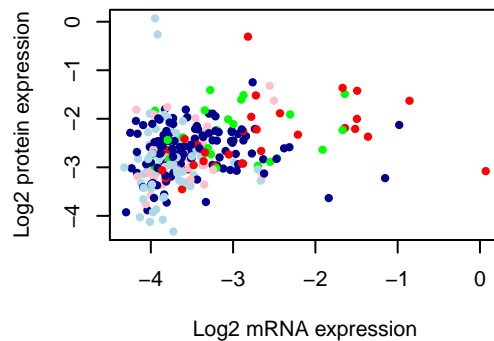

*PTK2*, cor=0.05

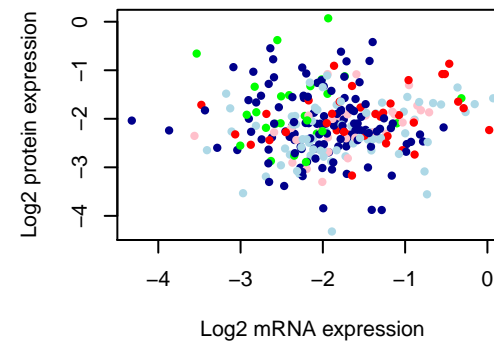

*PXN*, cor=0.33

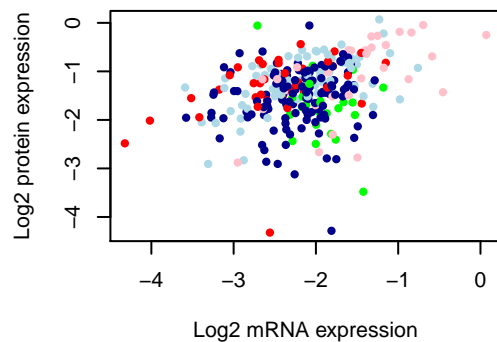

*RAB25*, cor=0.17

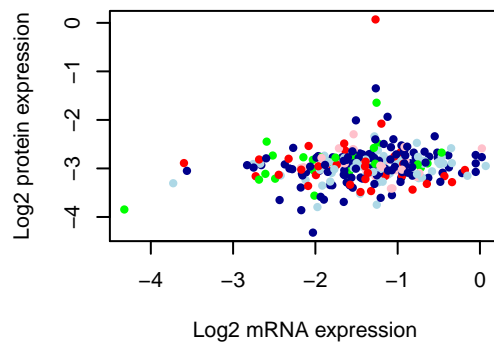

*RAD50*, cor=0.26

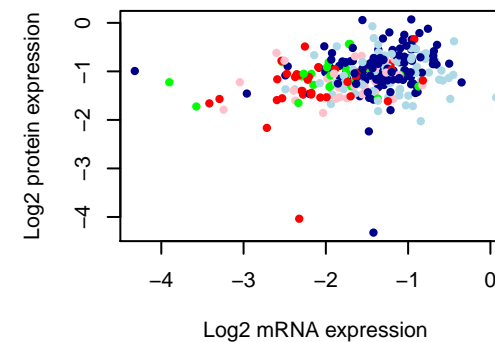

*RAD51*, cor=0.14

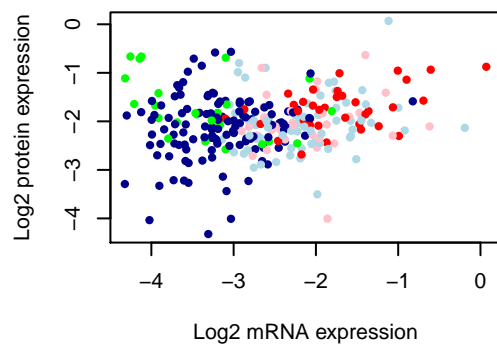

*RAF1*, cor=0.32

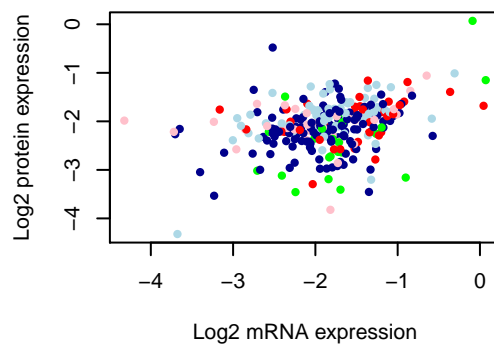

*RB1*, cor=0.11

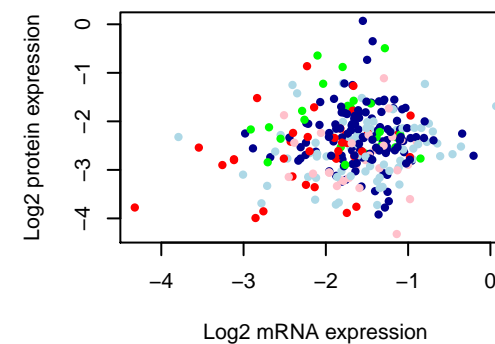

*RPS6KB1*, cor=0.7

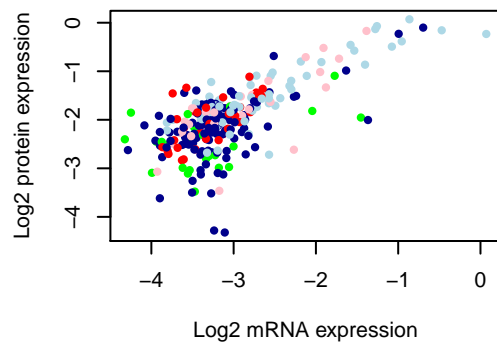

*SMAD1*, cor=0.57

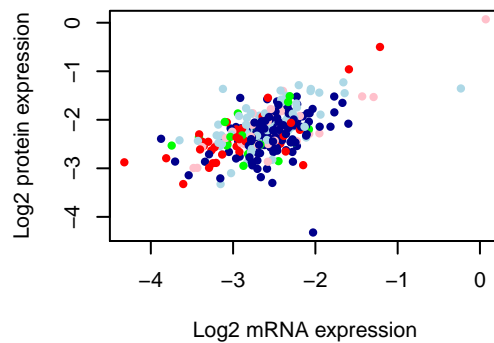

*SMAD3*, cor=0.57

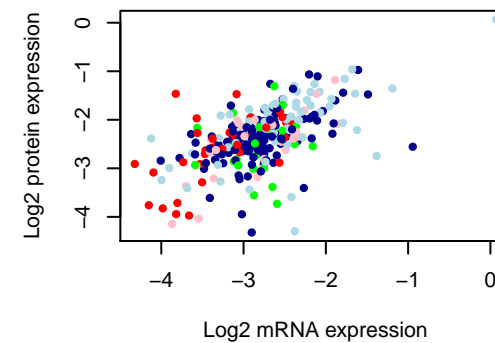

*SMAD4*, cor=0.05

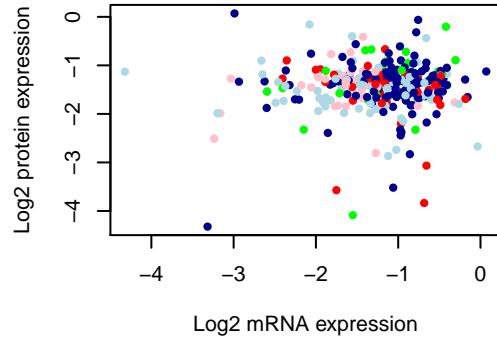

*SNAI1*, cor=0.03

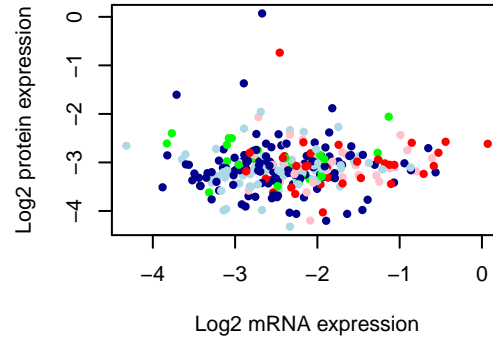

*SRC*, cor=0.54

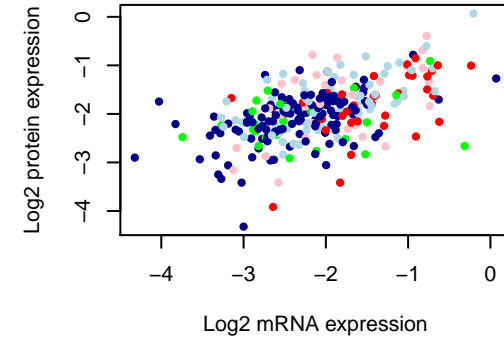

*STAT5A*, cor=0.54

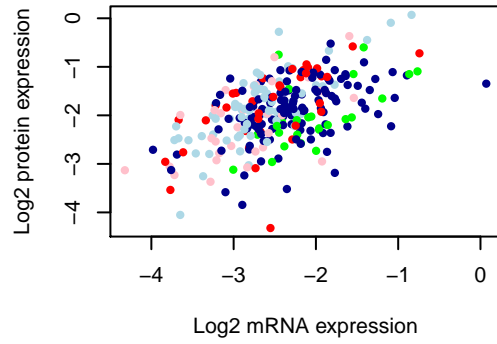

*STMN1*, cor=-0.01

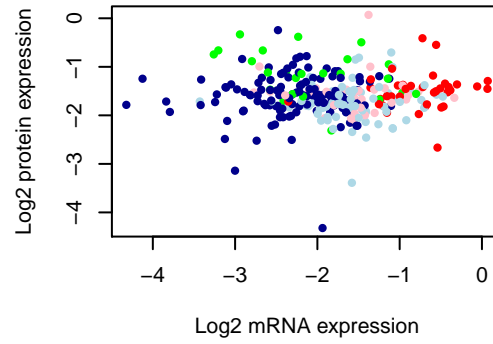

*SYK*, cor=0.49

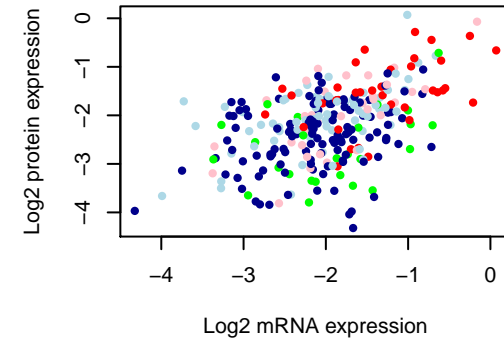

*TP53*, cor=0.11

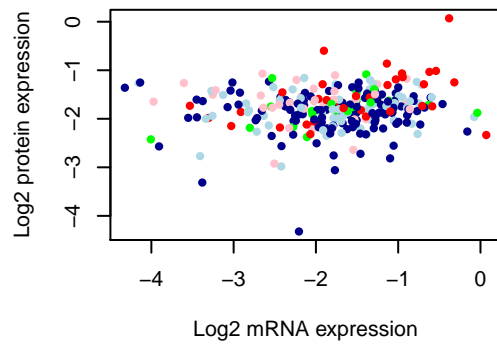

*TP53BP1*, cor=0.49

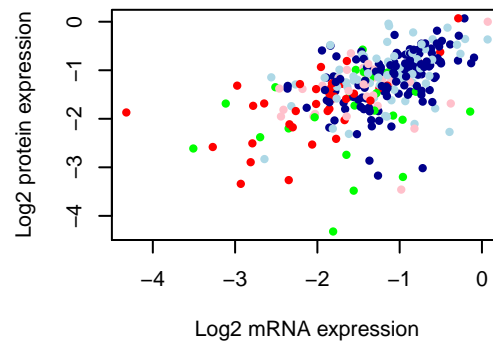

*TSC2*, cor=0.25

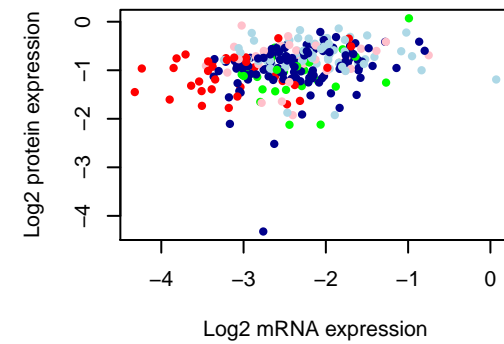

*VASP*, cor=0.4

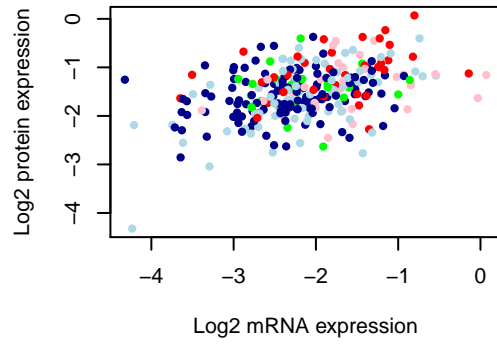

*XIAP*, cor=0.27

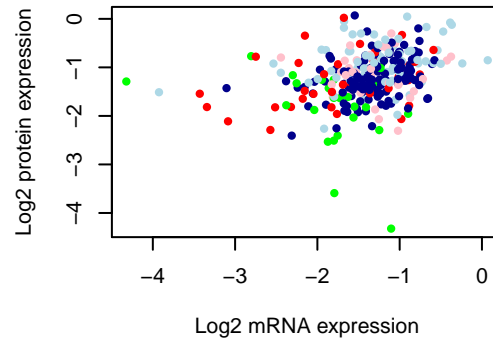

*XRCC1*, cor=0.35

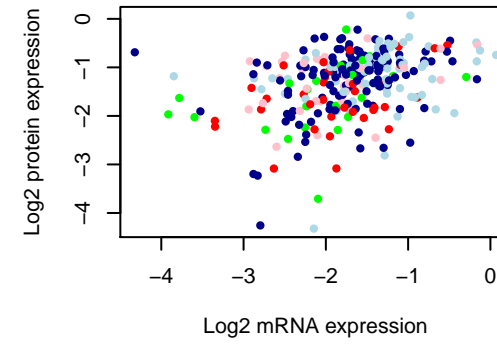

*YAP1*, cor=0.47

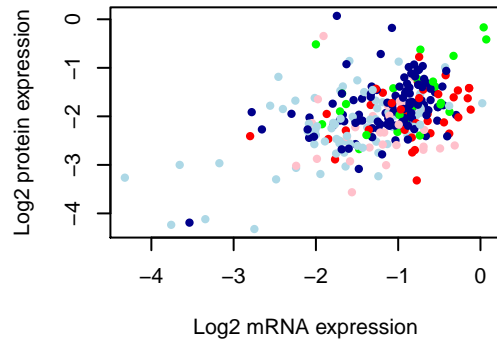

*YBX1*, cor=0.14

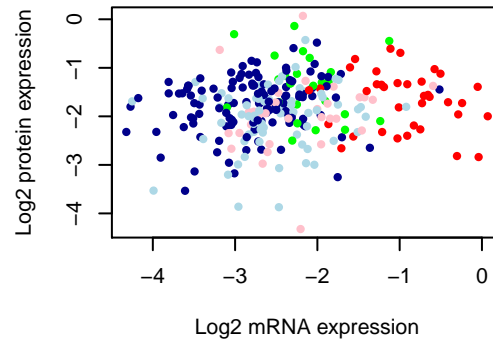

*YWHAE*, cor=-0.03

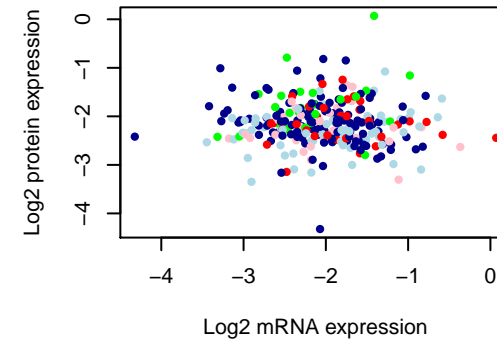

Supplement: 13073_2015_135_MOESM6_ESM.pdf [file 13073_2015_135_MOESM6_ESM.pdf]
