# Supplementary material for: Integrated analysis reveals microRNA networks coordinately expressed with key proteins in breast cancer
Source: PubMed Central journal article supplement (PMC4396592; doi:10.1186/s13073-015-0135-5), 2015-02-02

**AKT1**

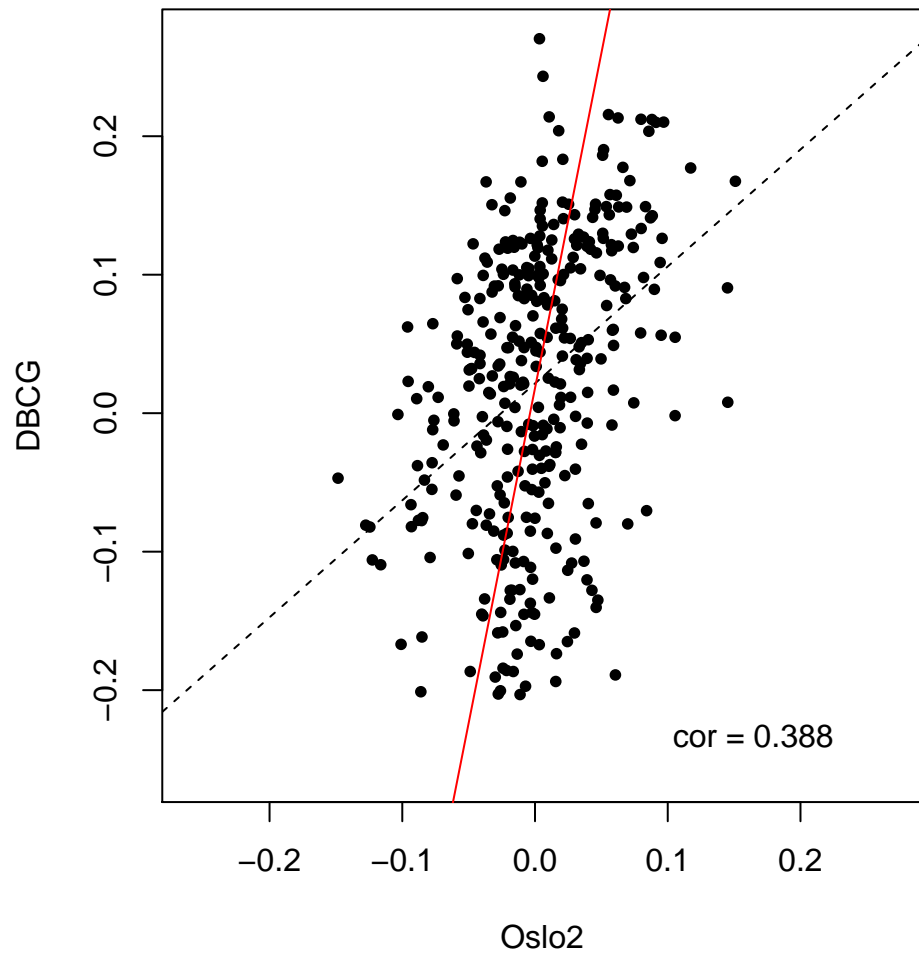

**AKT1**

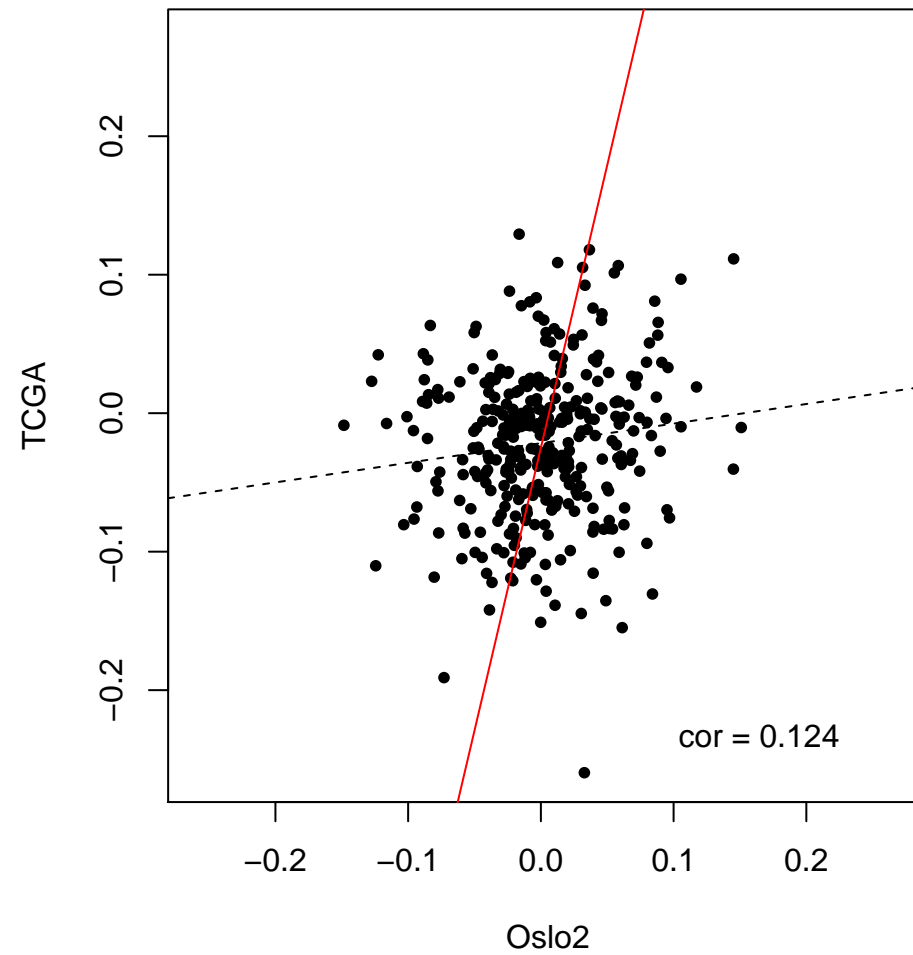

AKT2

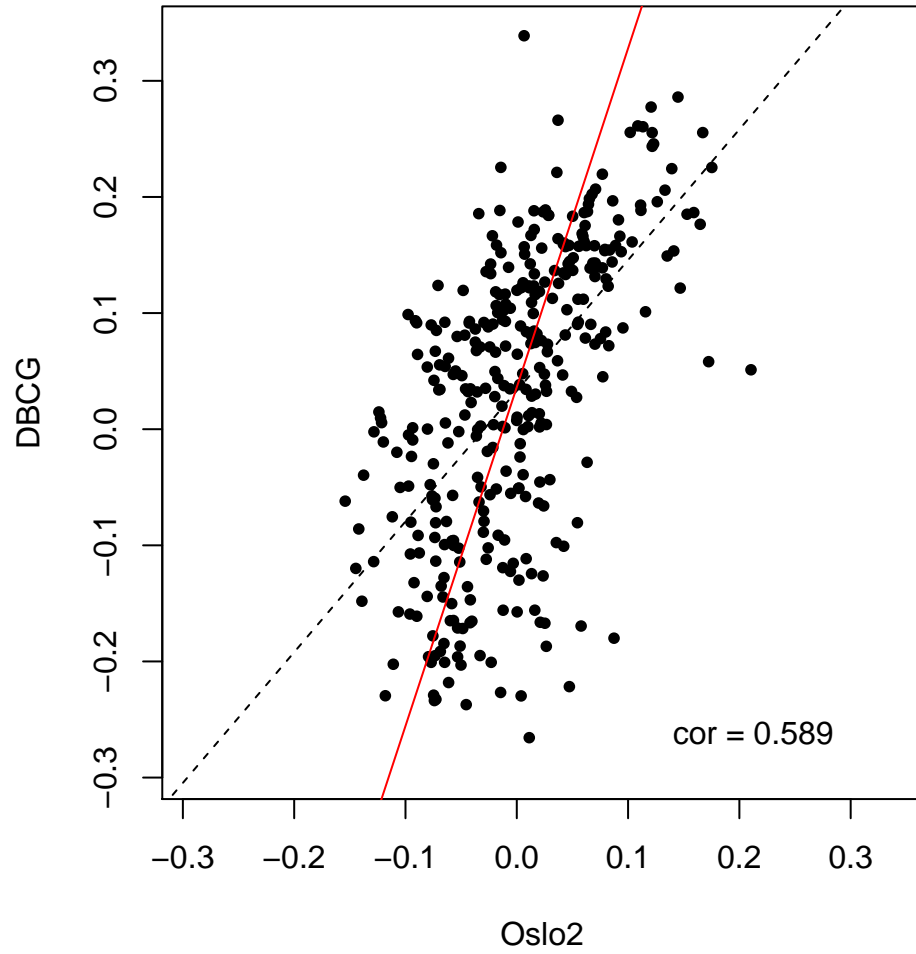

AKT2

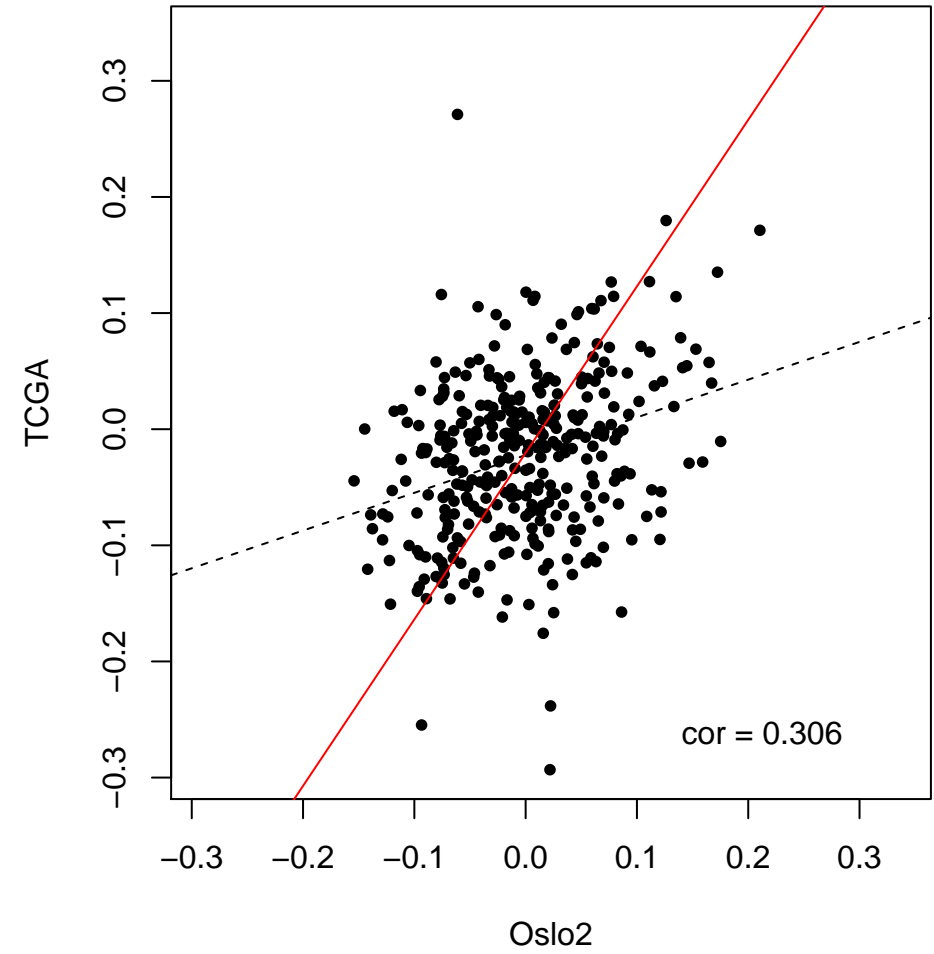

AKT3

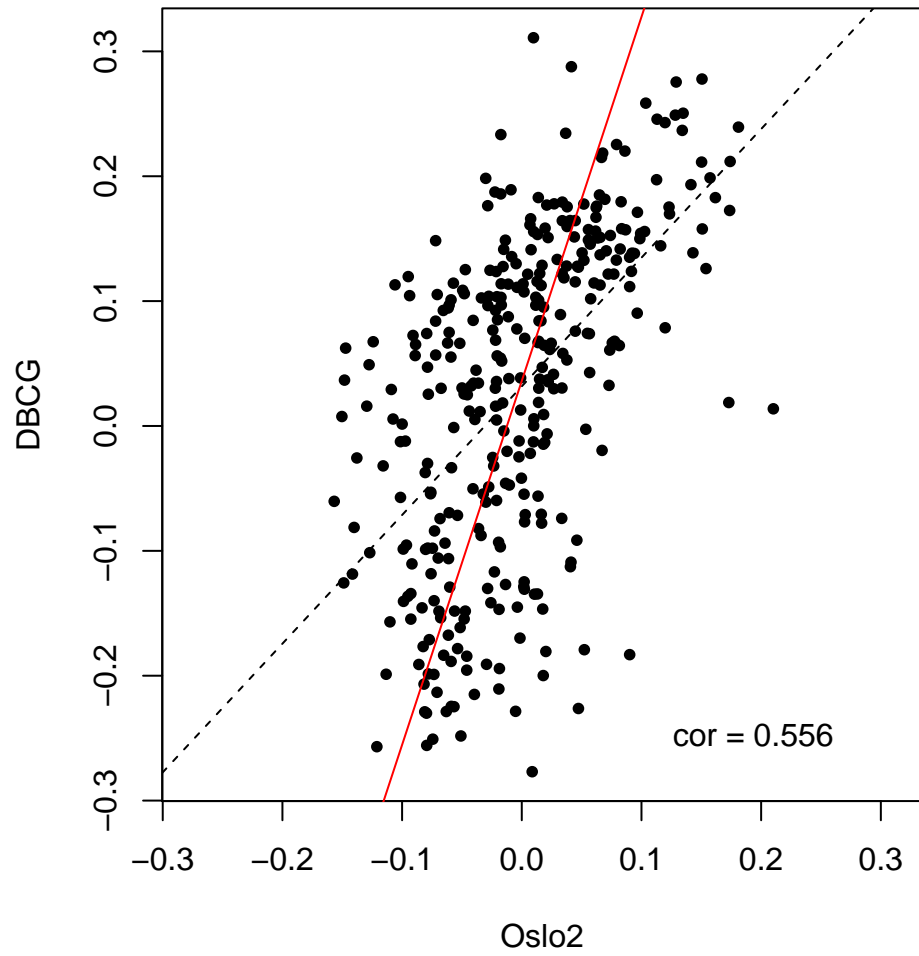

AKT3

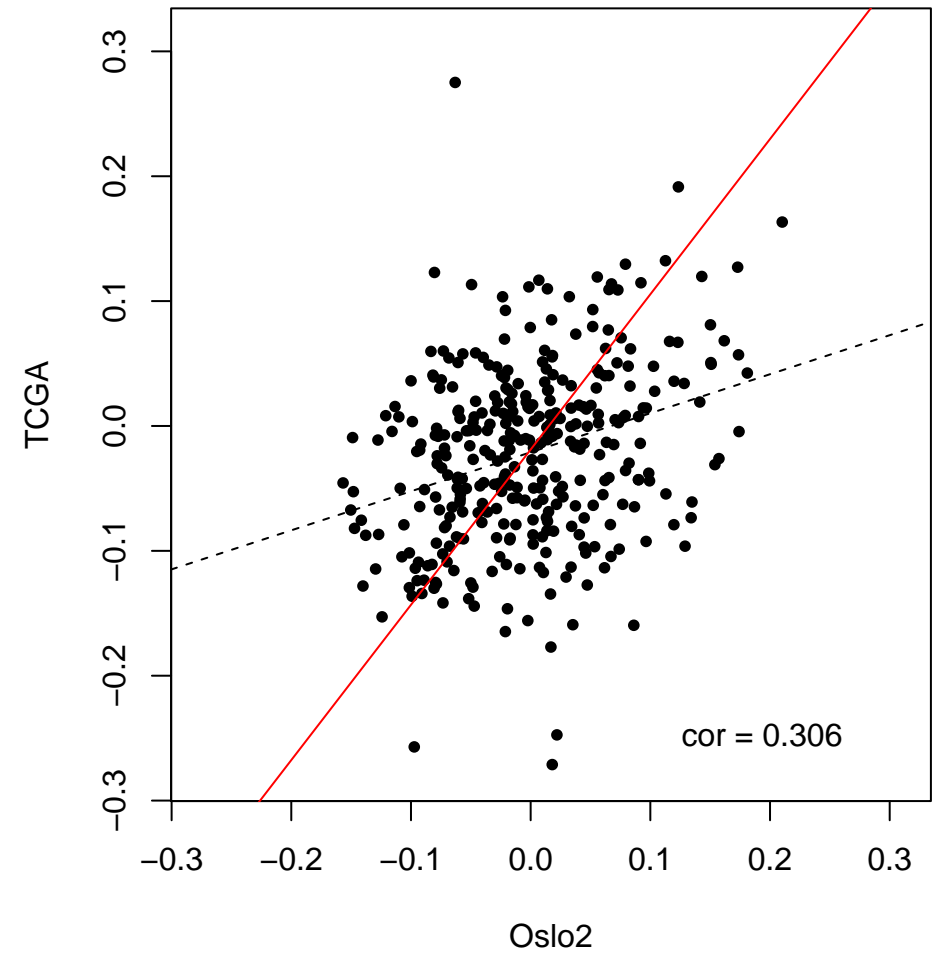

**BCL2**

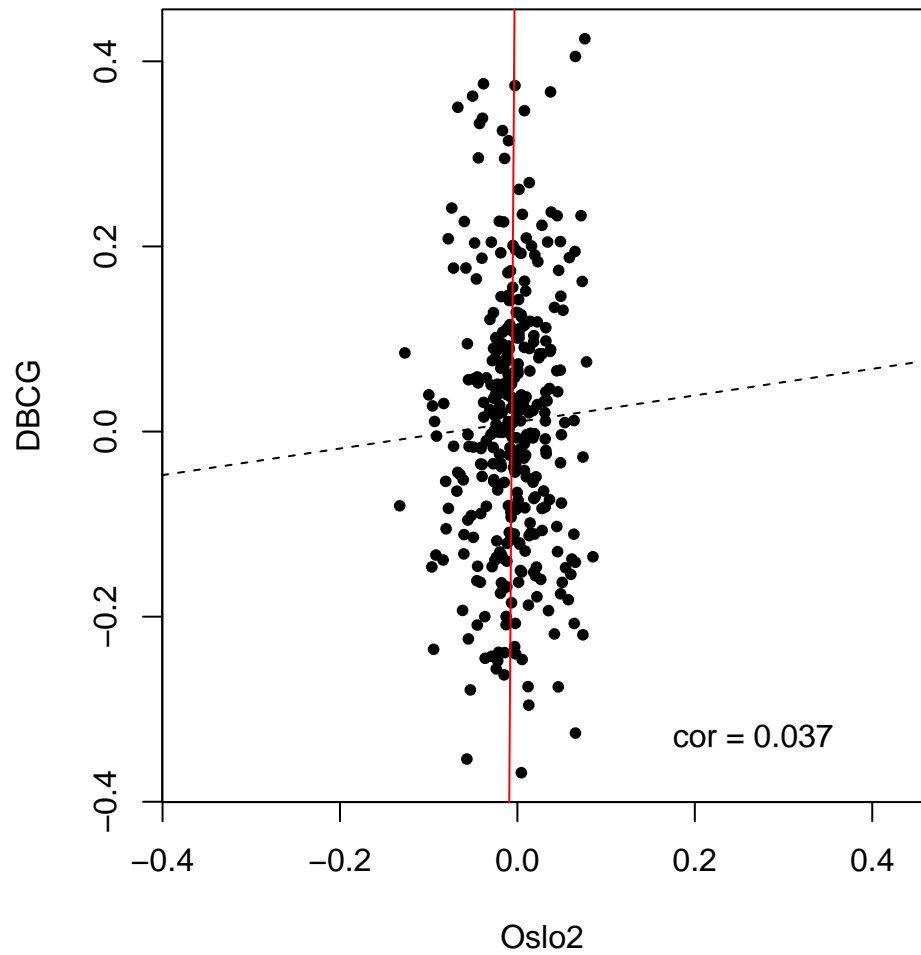

**BCL2**

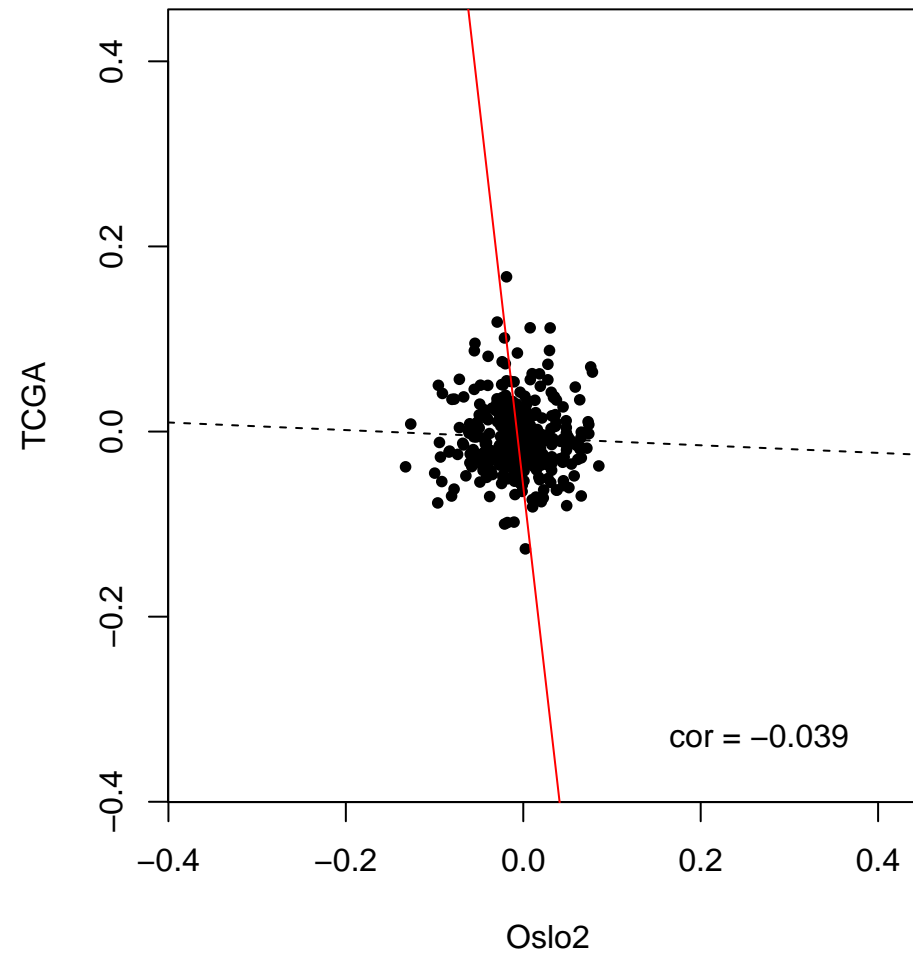

CAV1

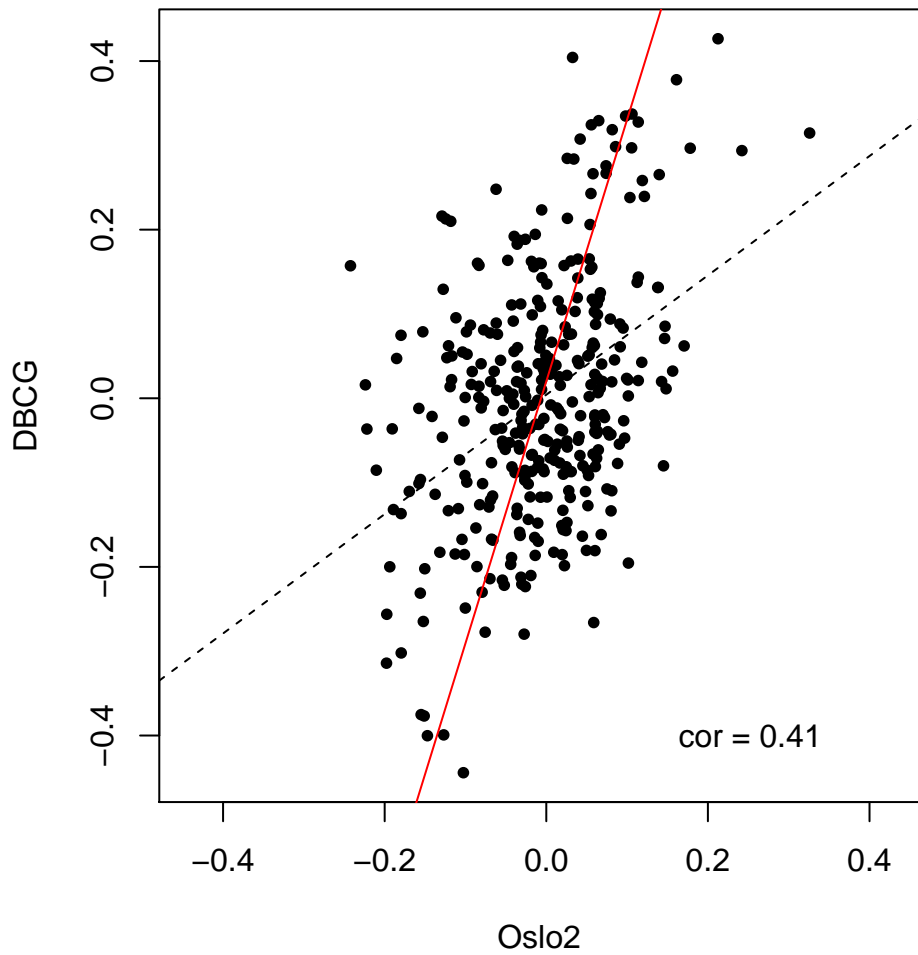

CAV1

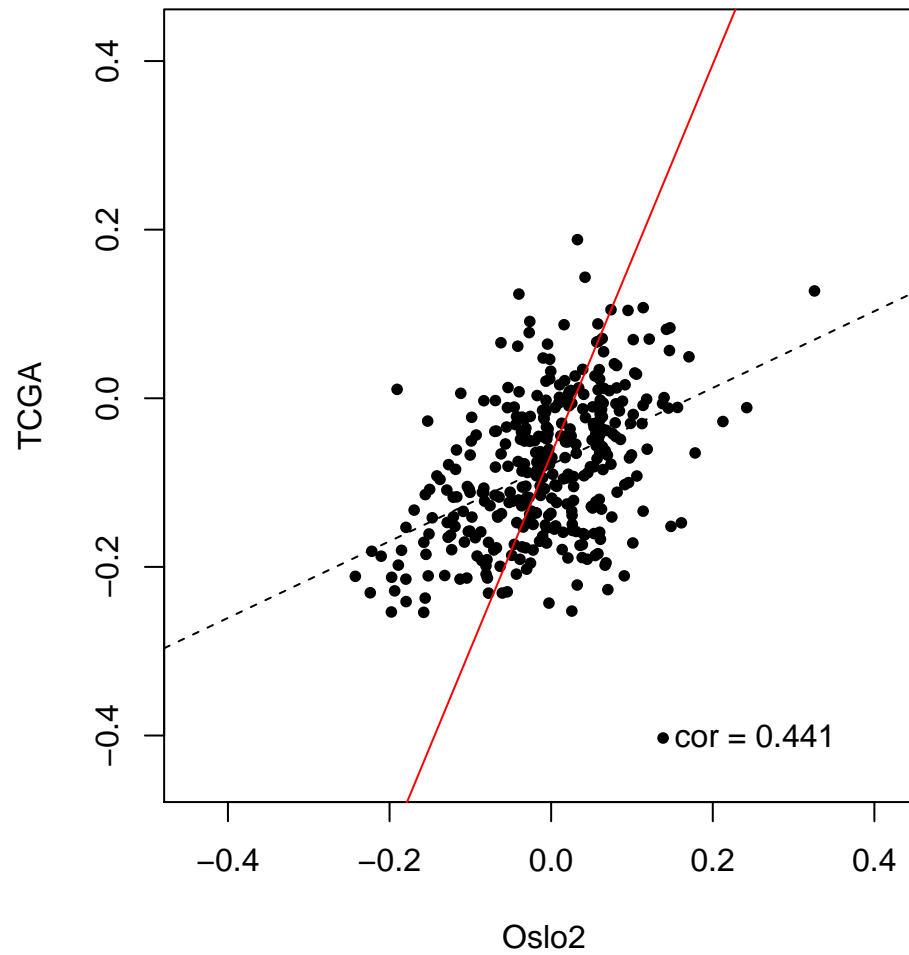

**CCNB1**

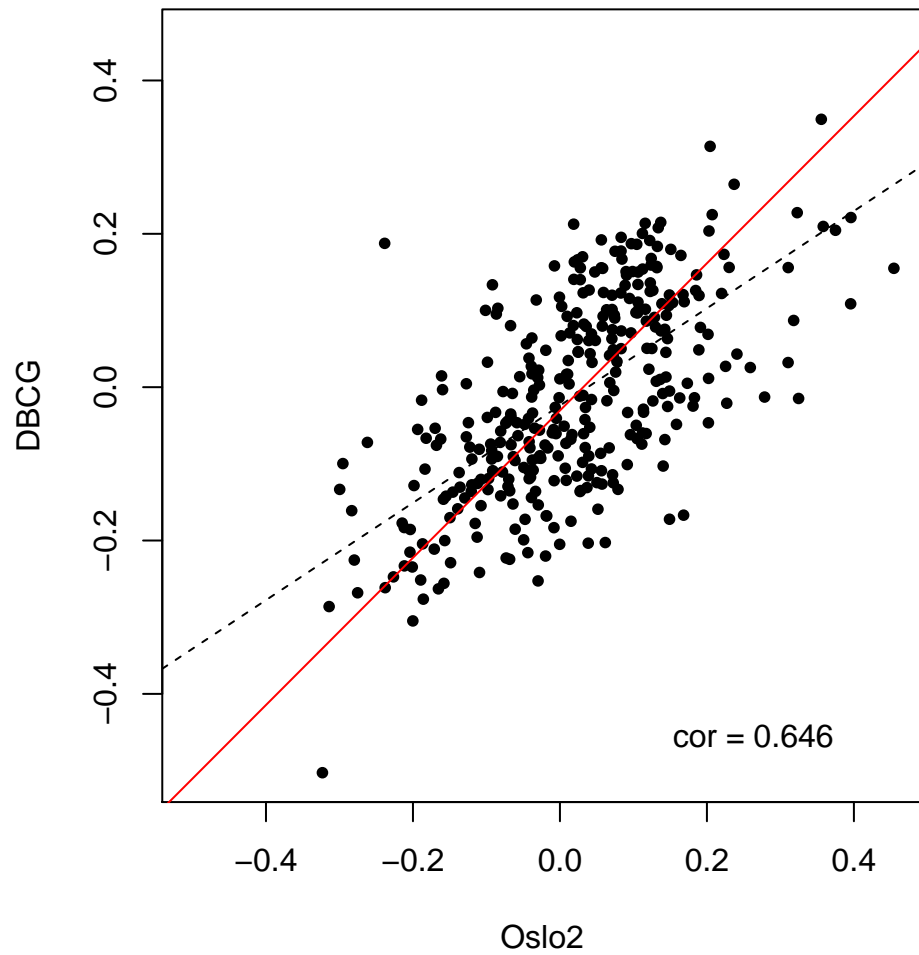

**CCNB1**

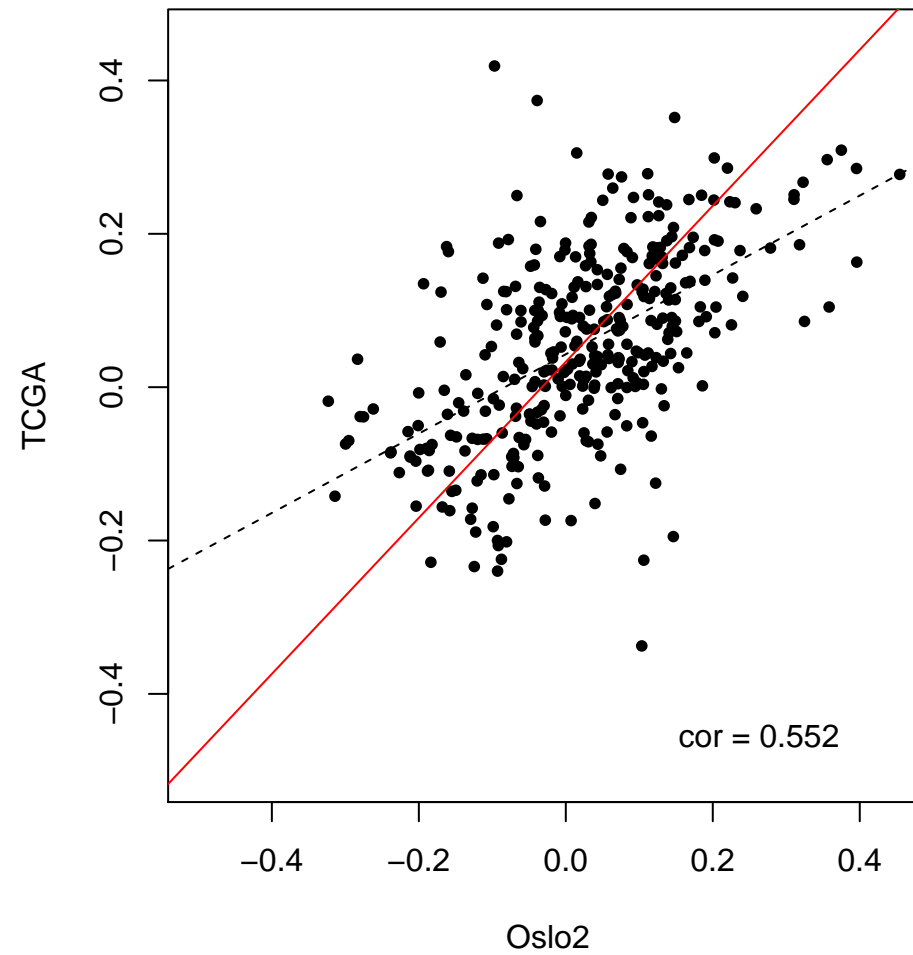

**CCND1**

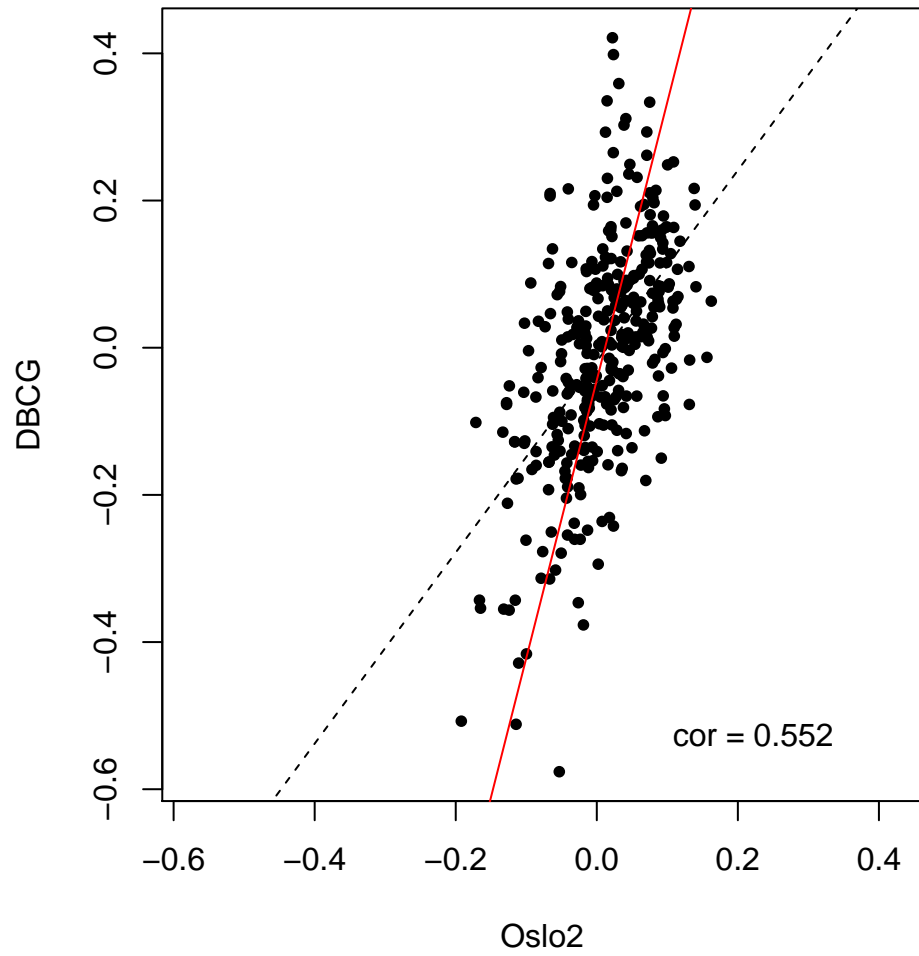

**CCND1**

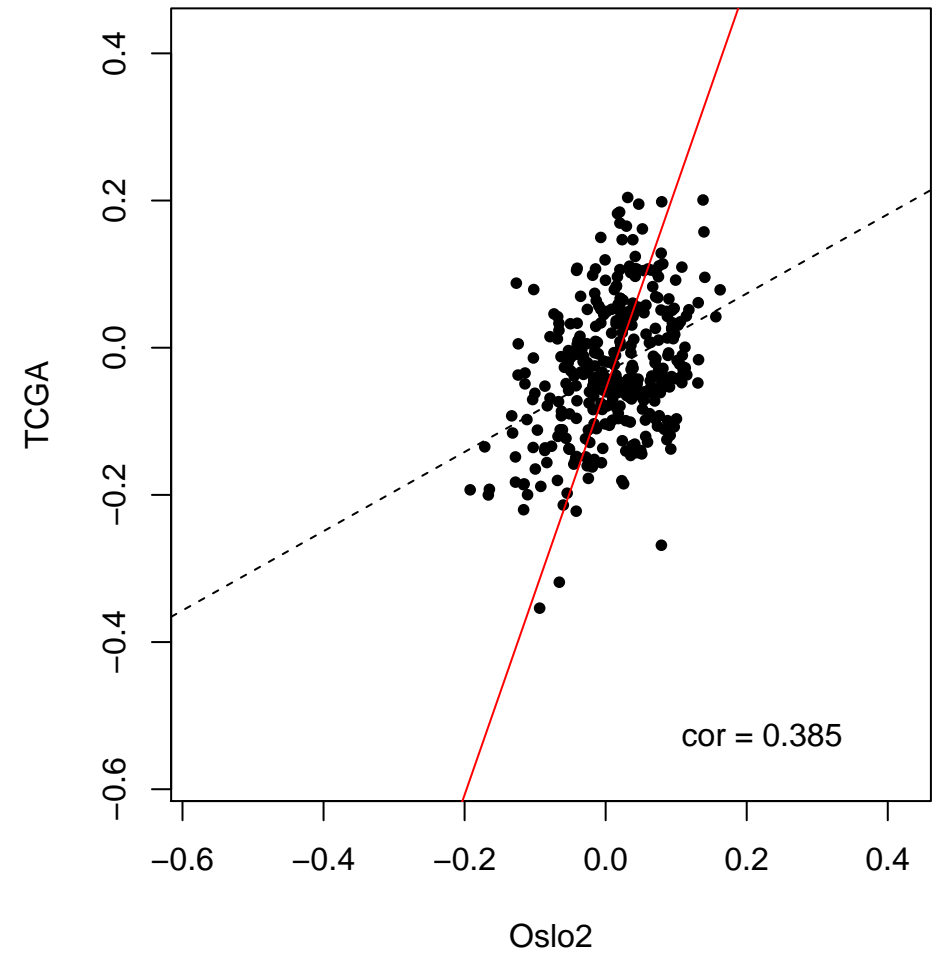

CCNE1

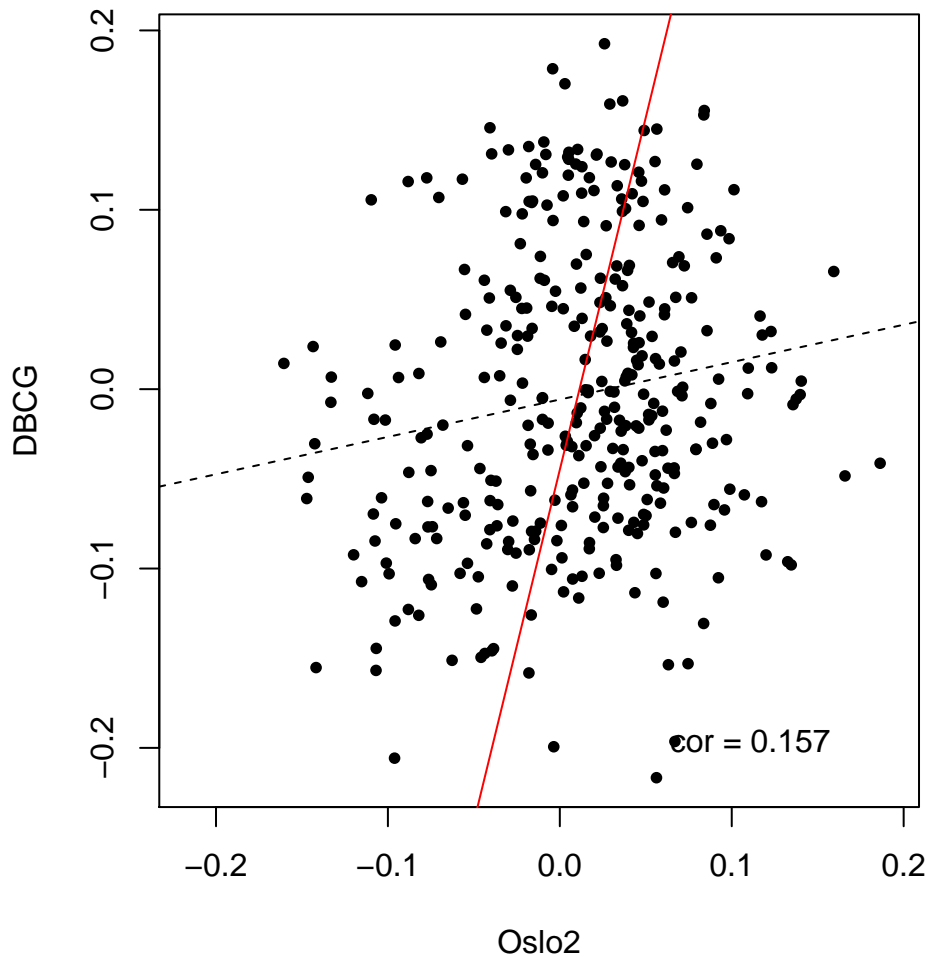

CCNE1

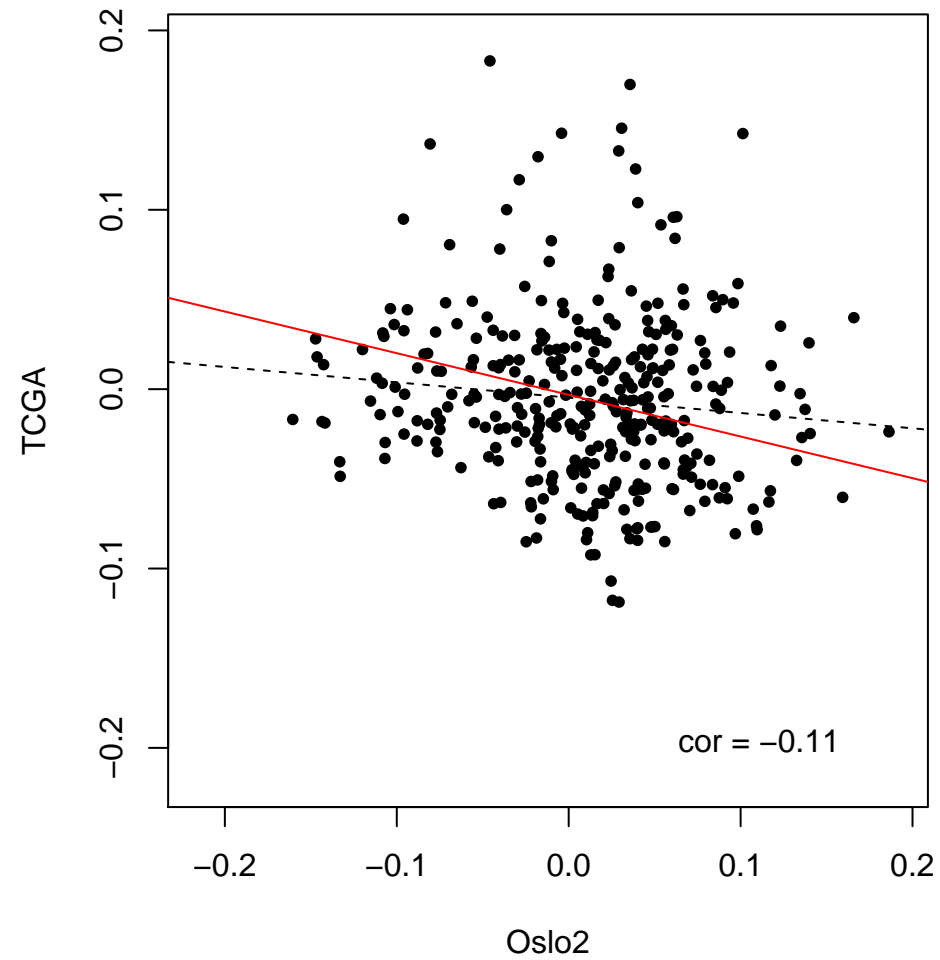



CDH1

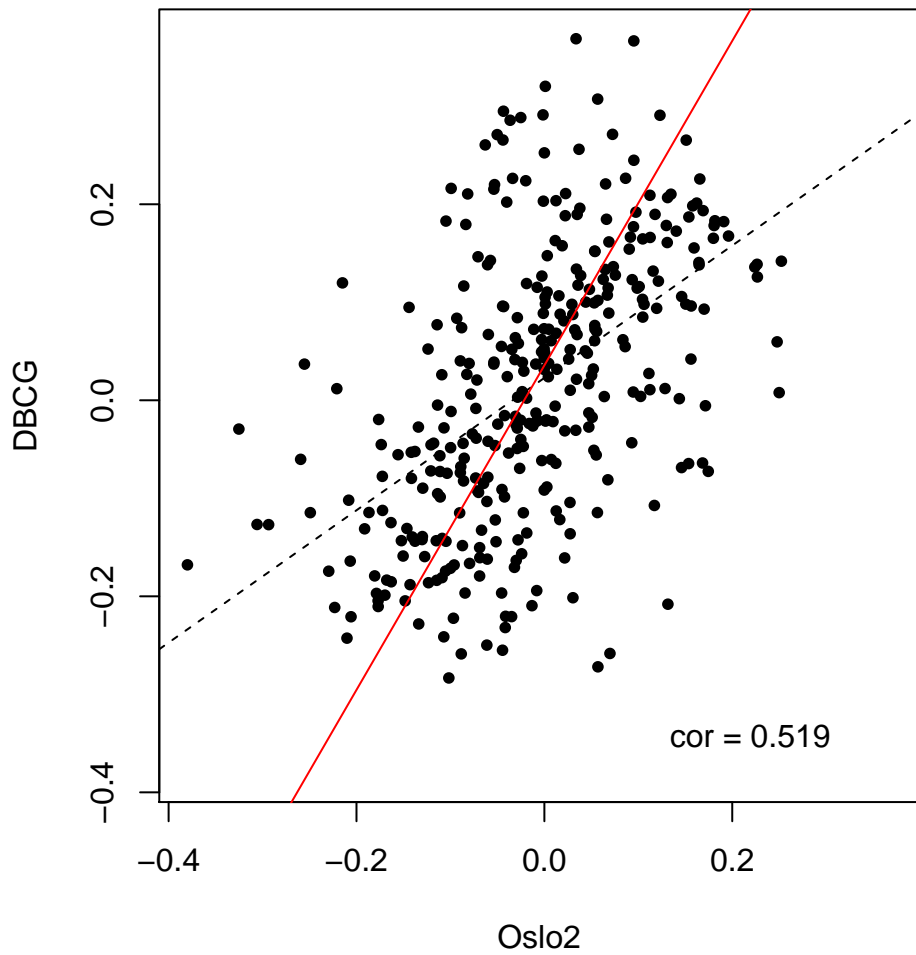

CDH1

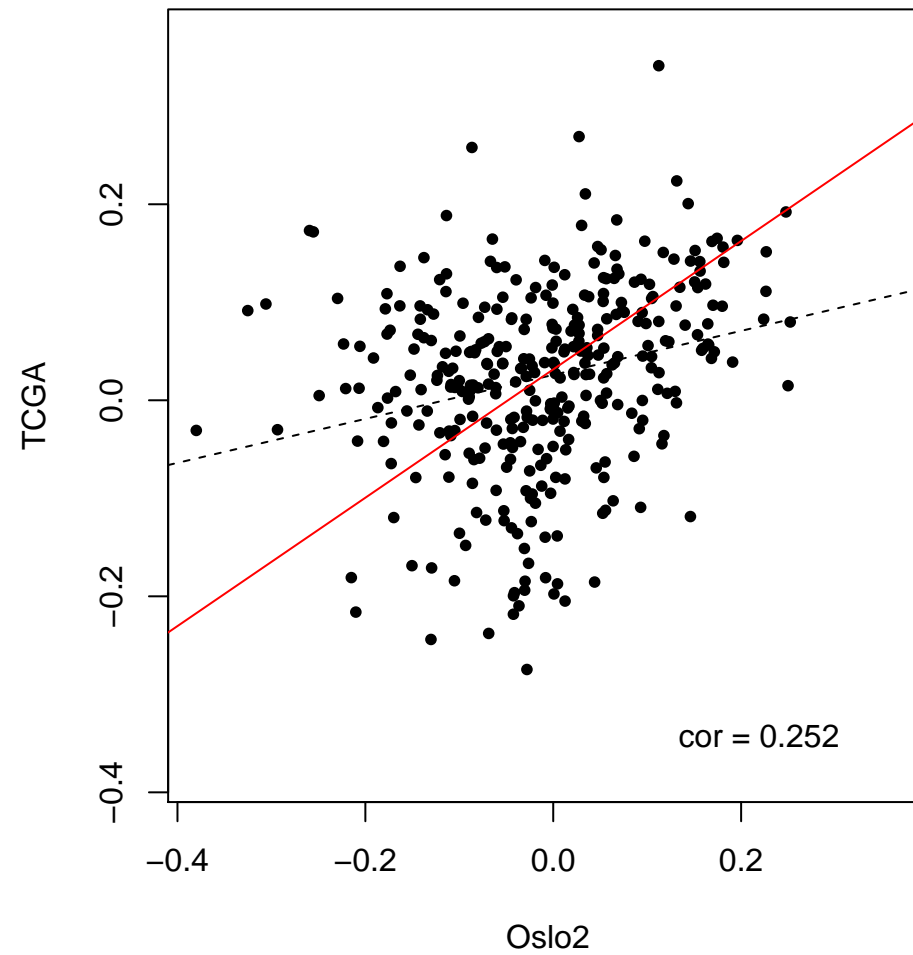

CDKN1B

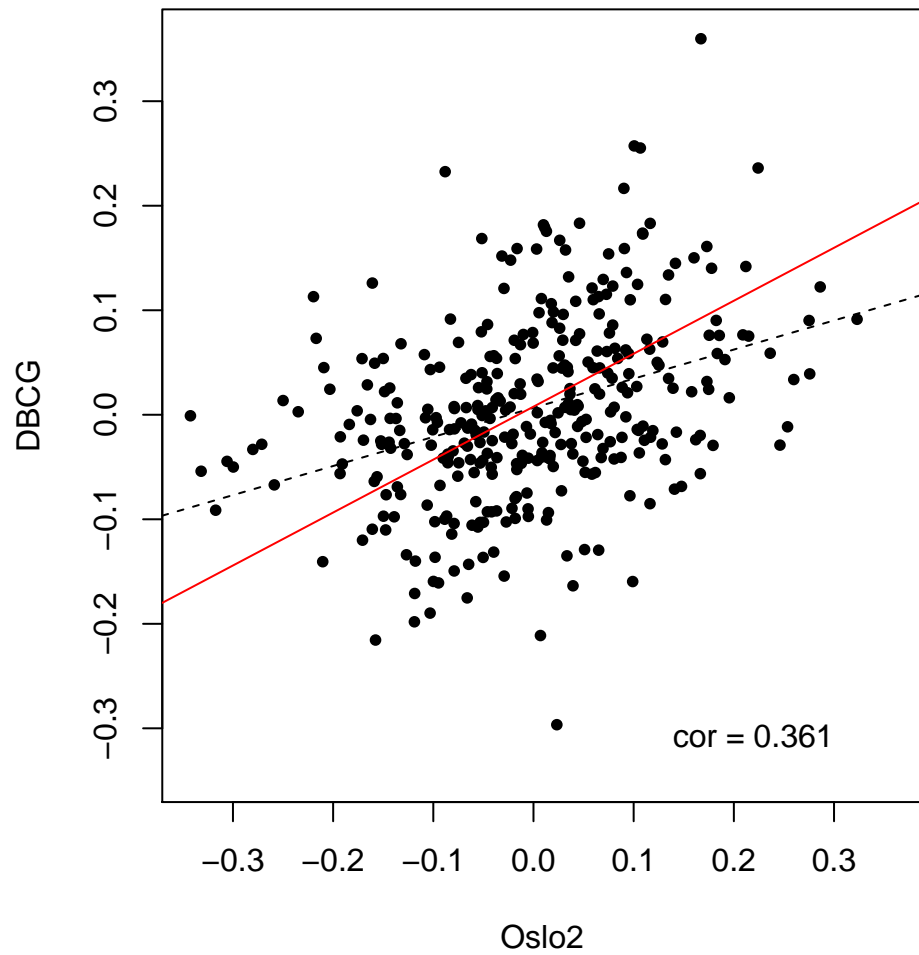

CDKN1B

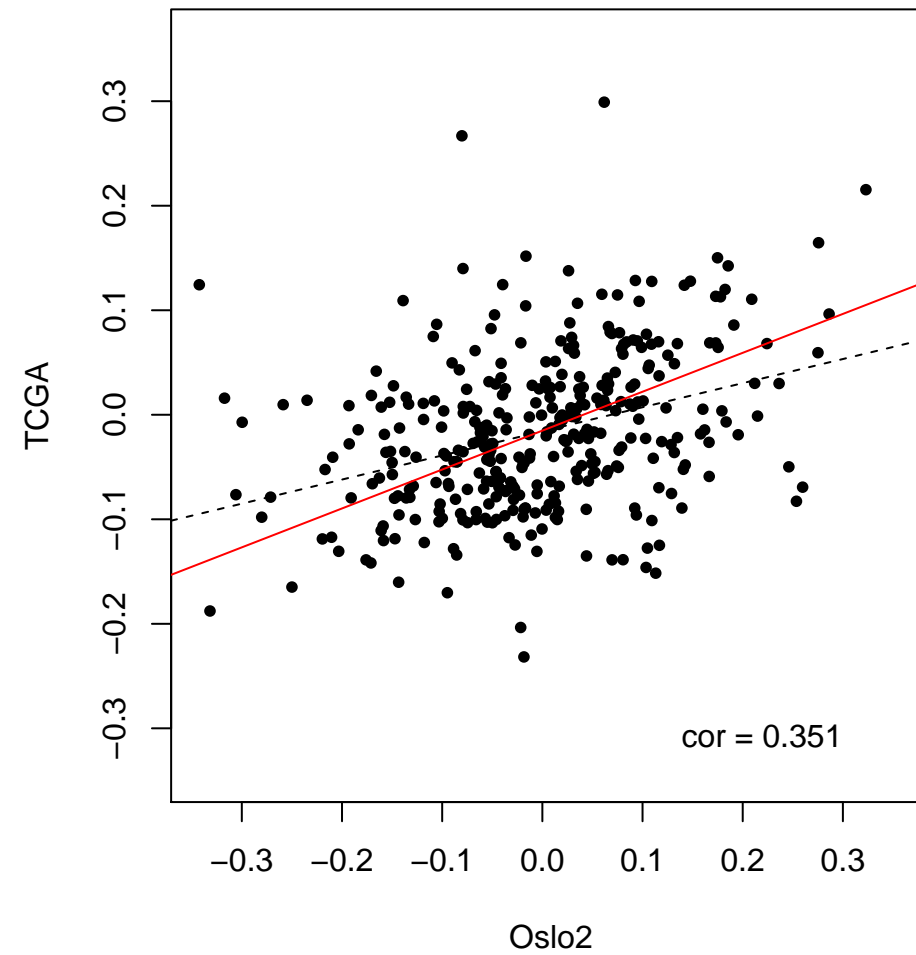

COL6A1

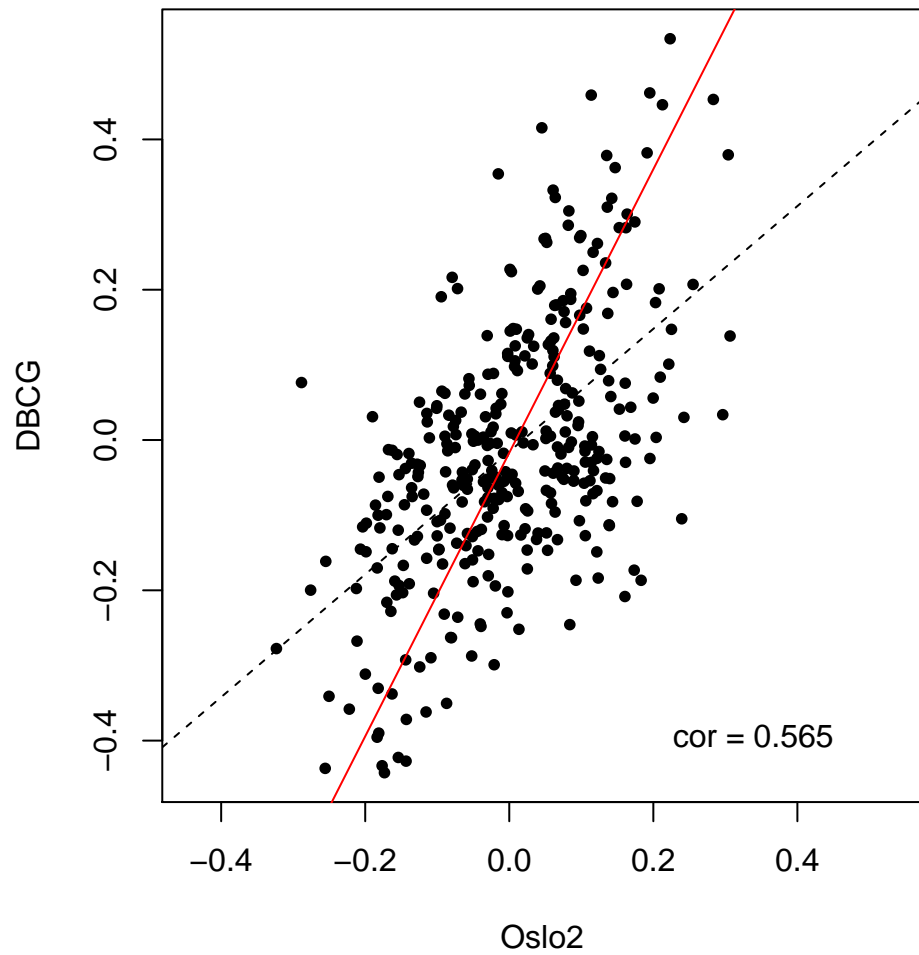

COL6A1

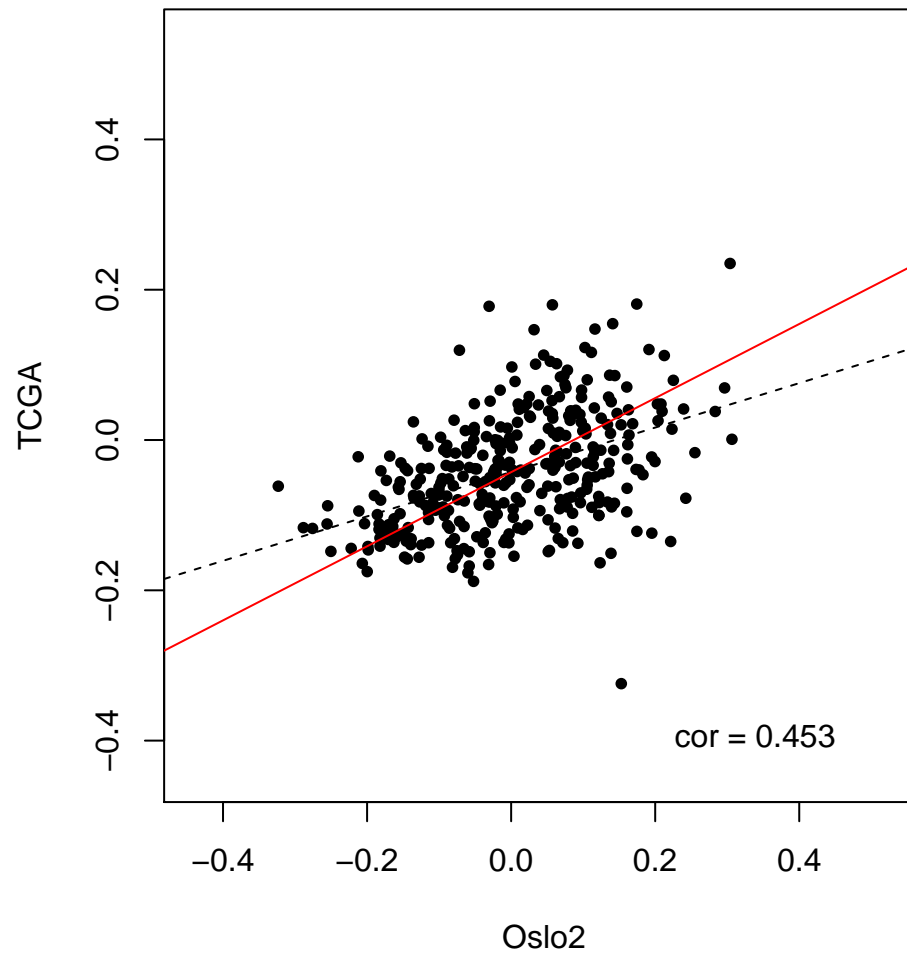

CTNNB1

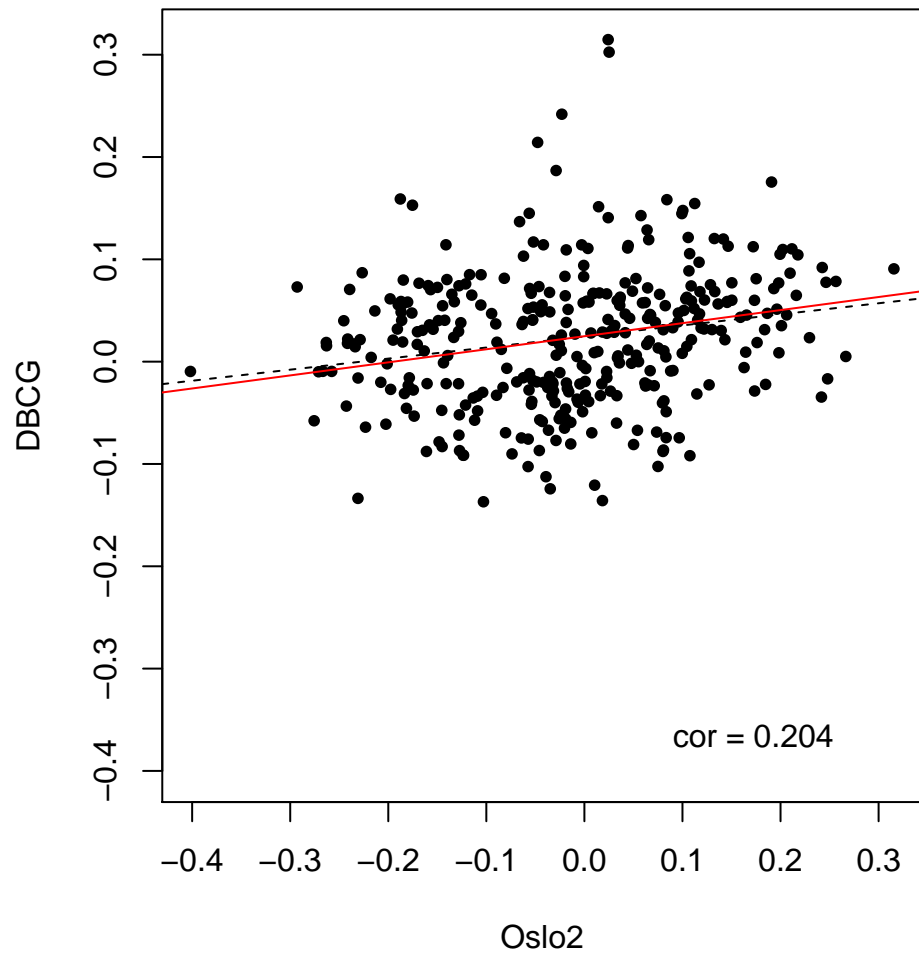

CTNNB1

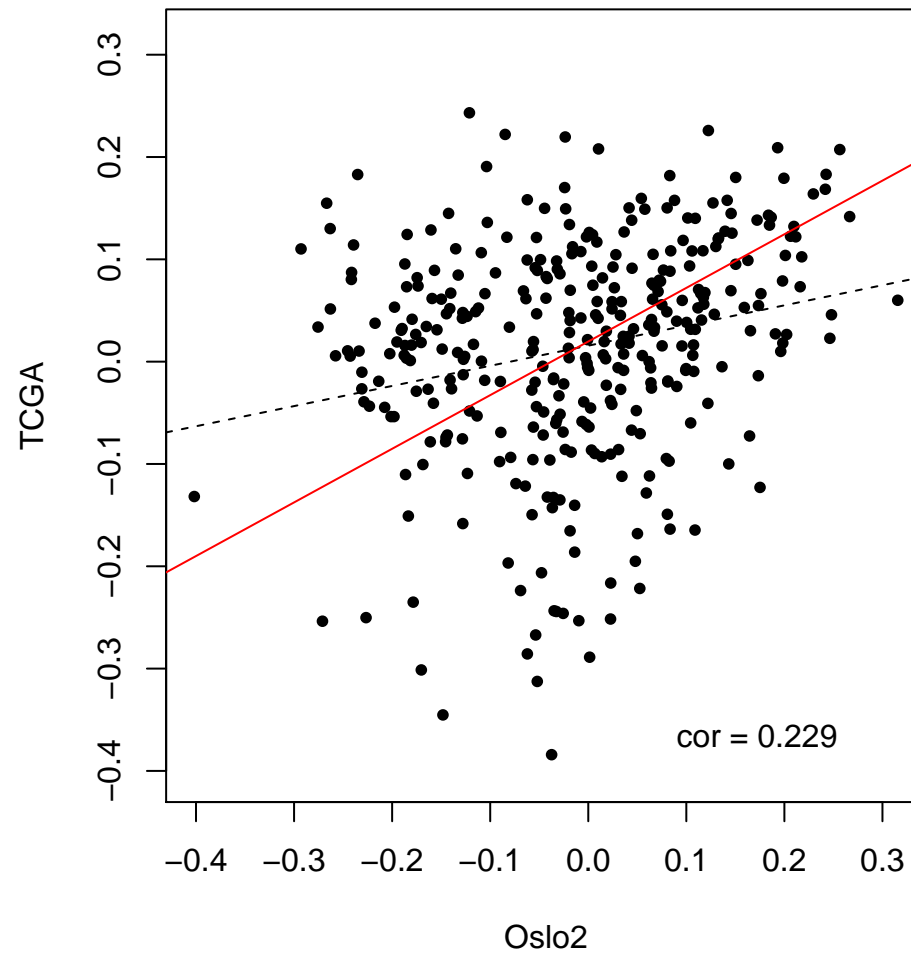

**EGFR**

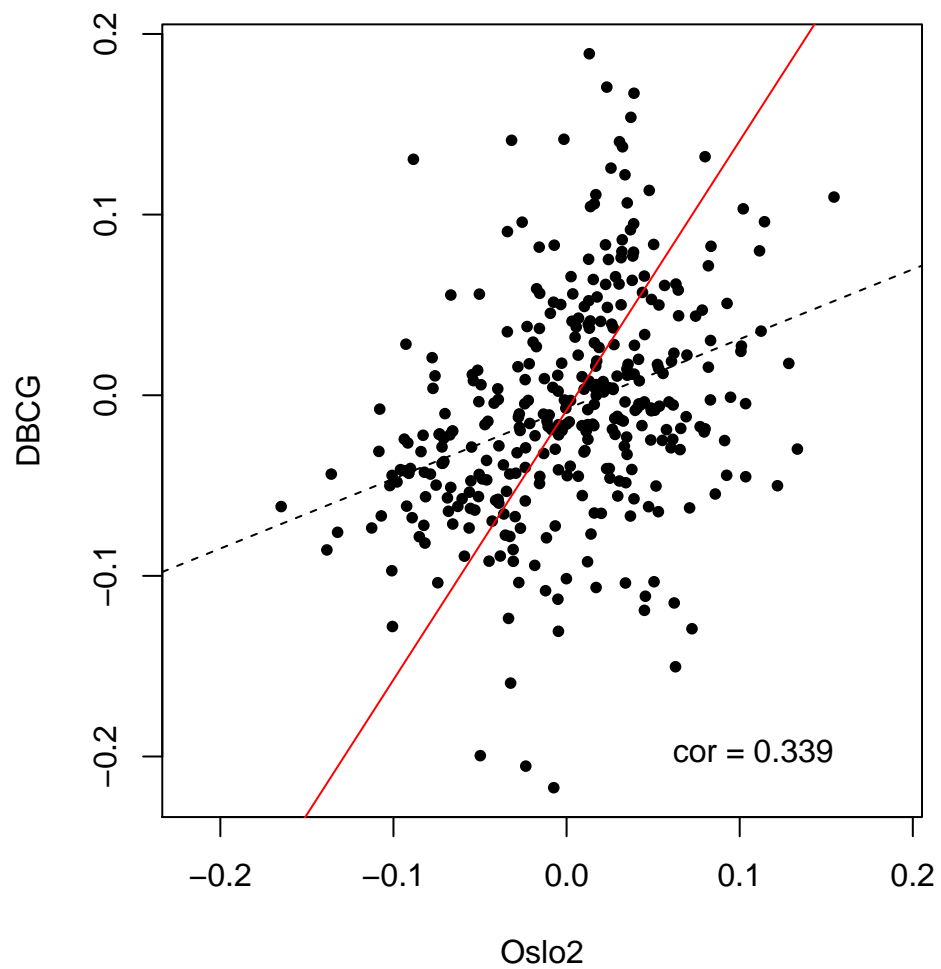

**EGFR**

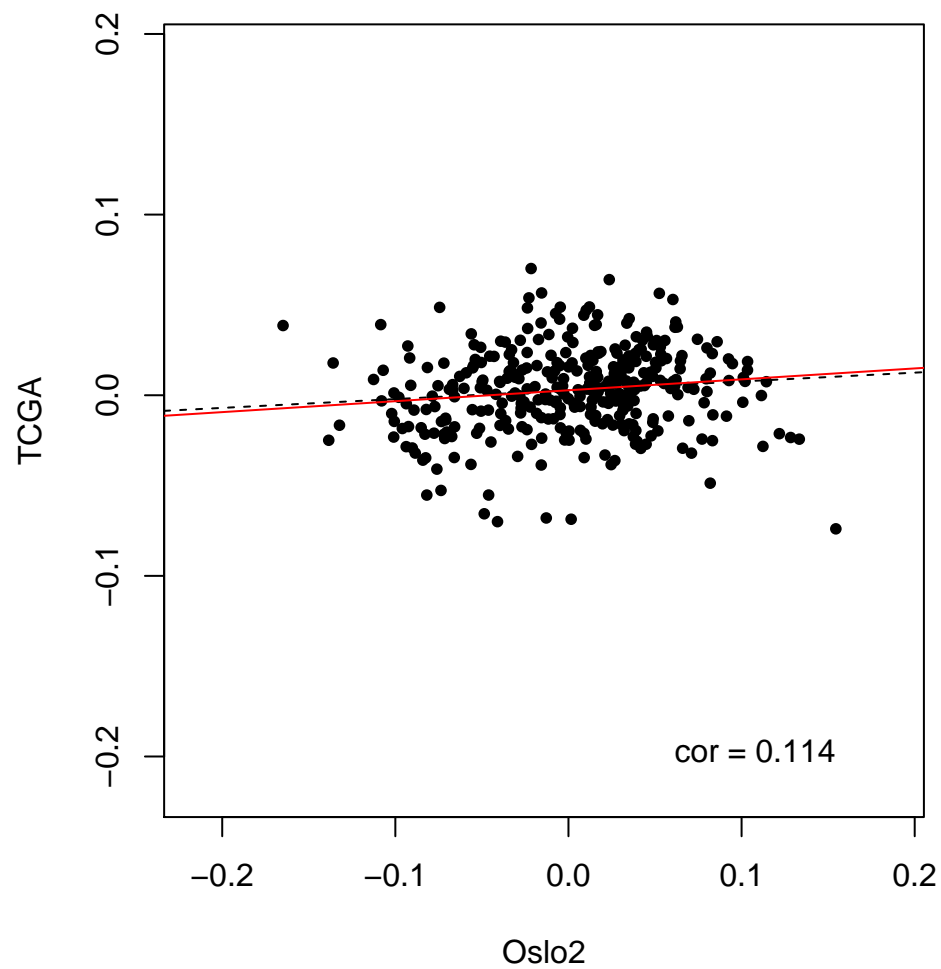

**EIF4EBP1**

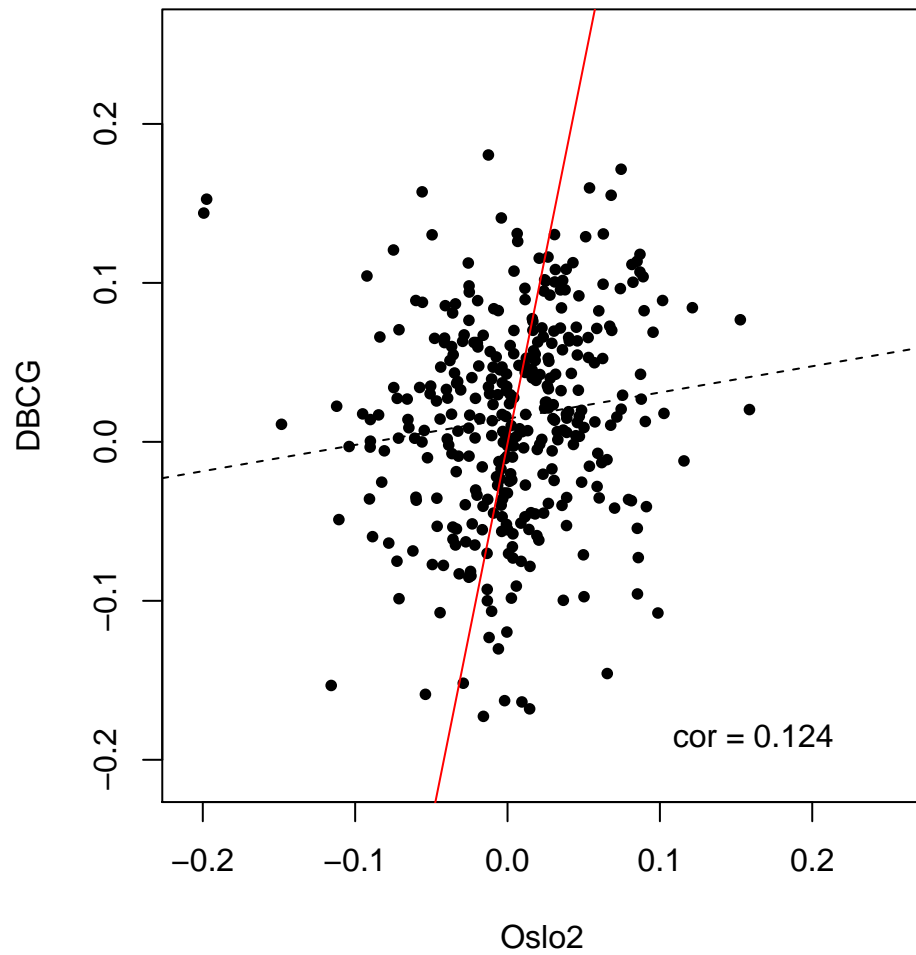

**EIF4EBP1**

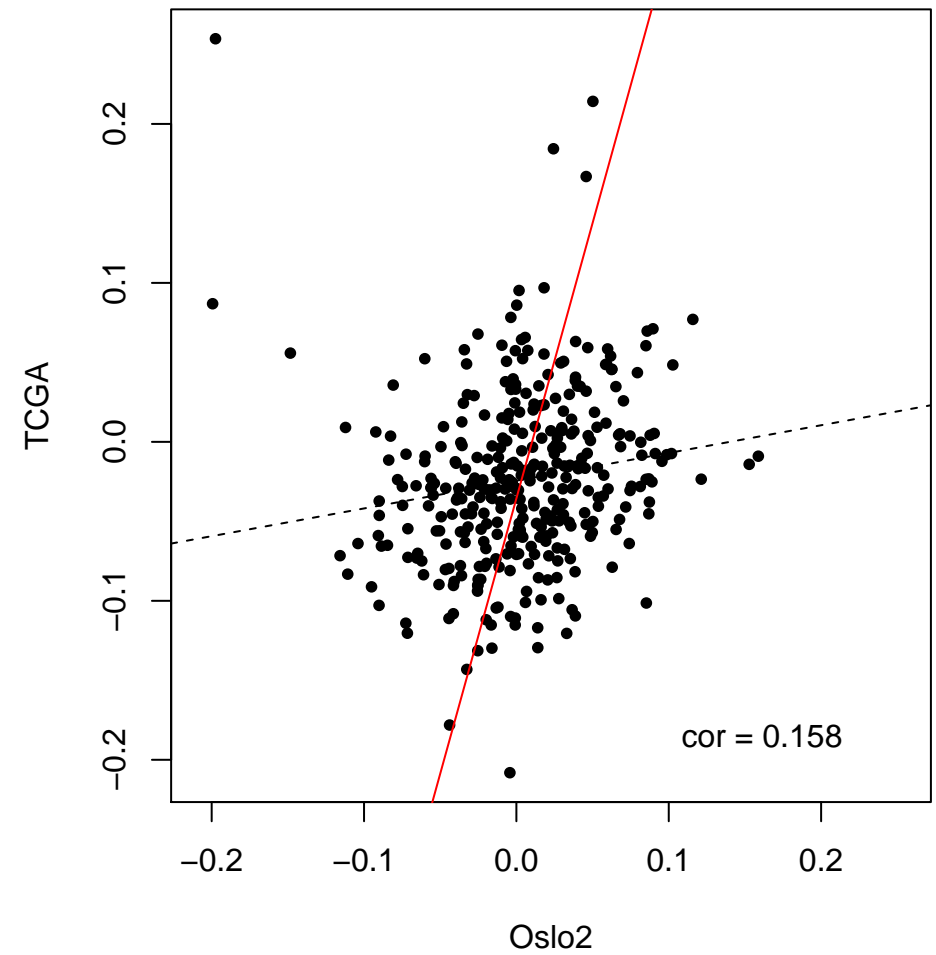

ERBB2

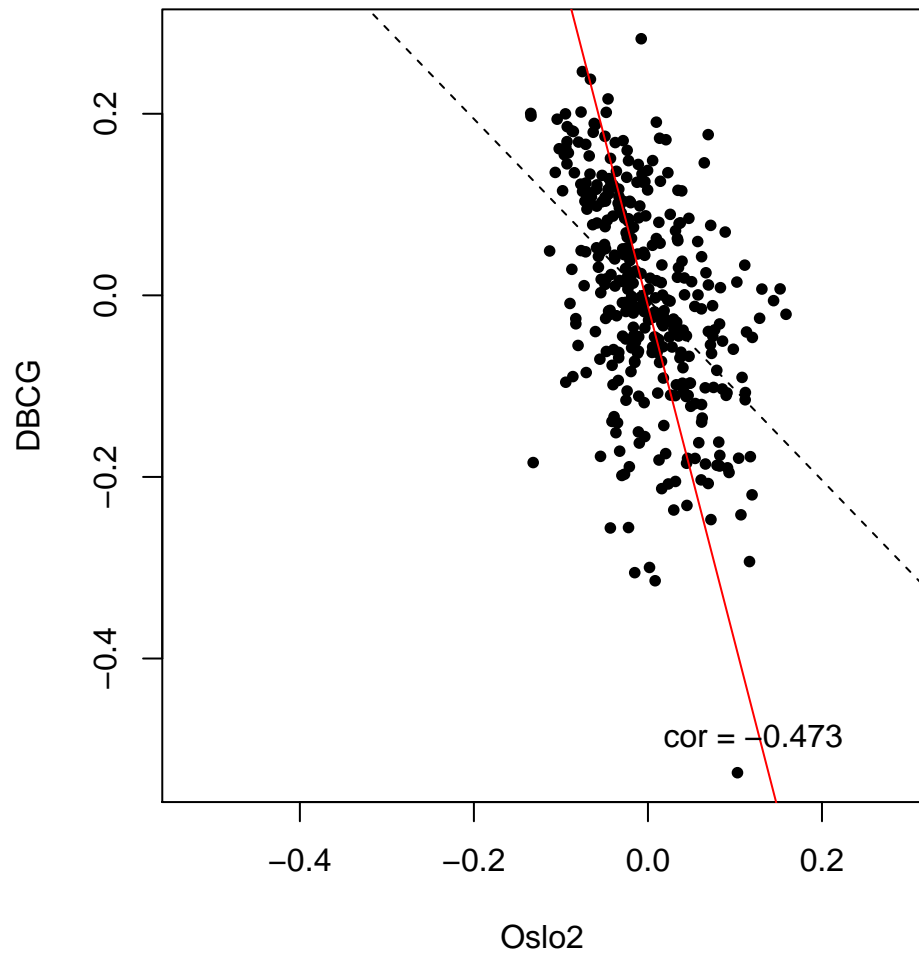

ERBB2

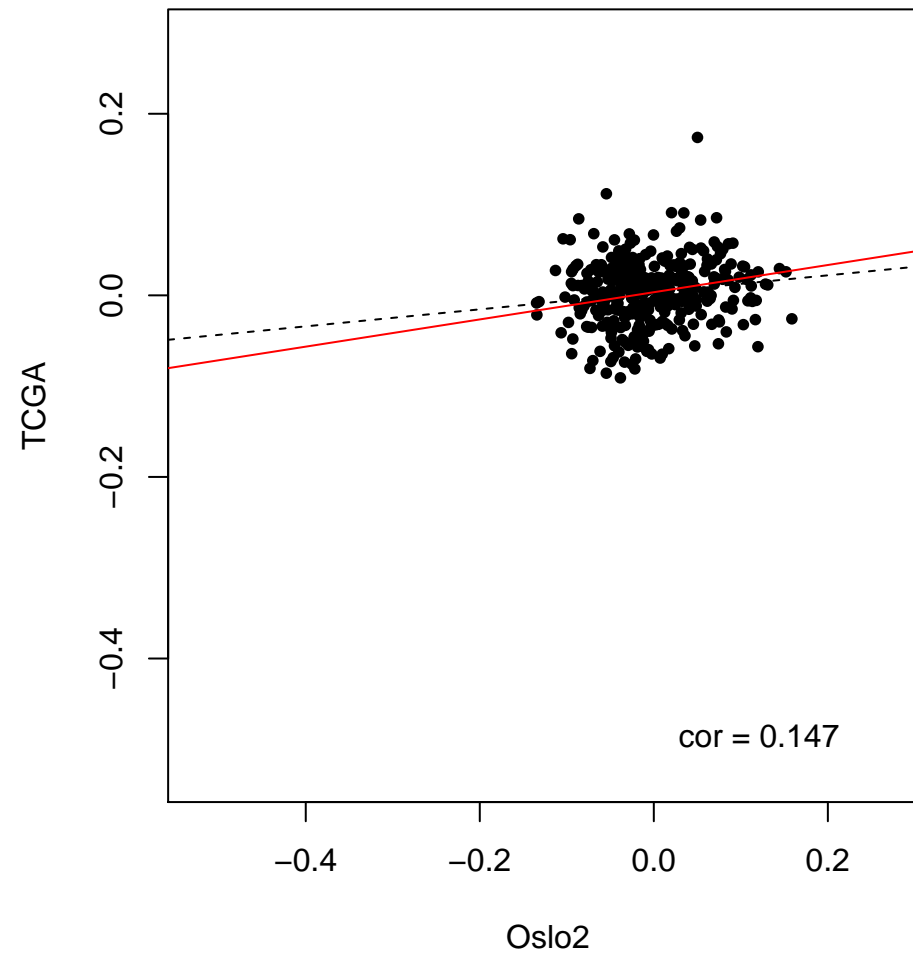

ESR1

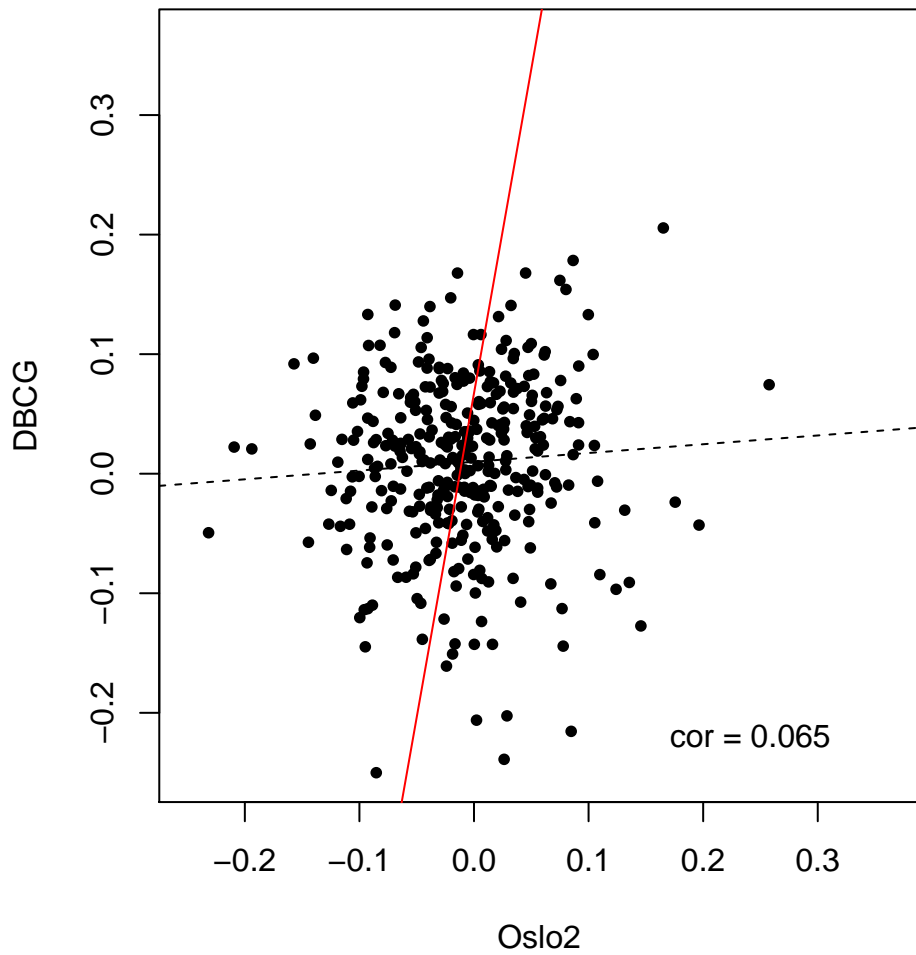

ESR1

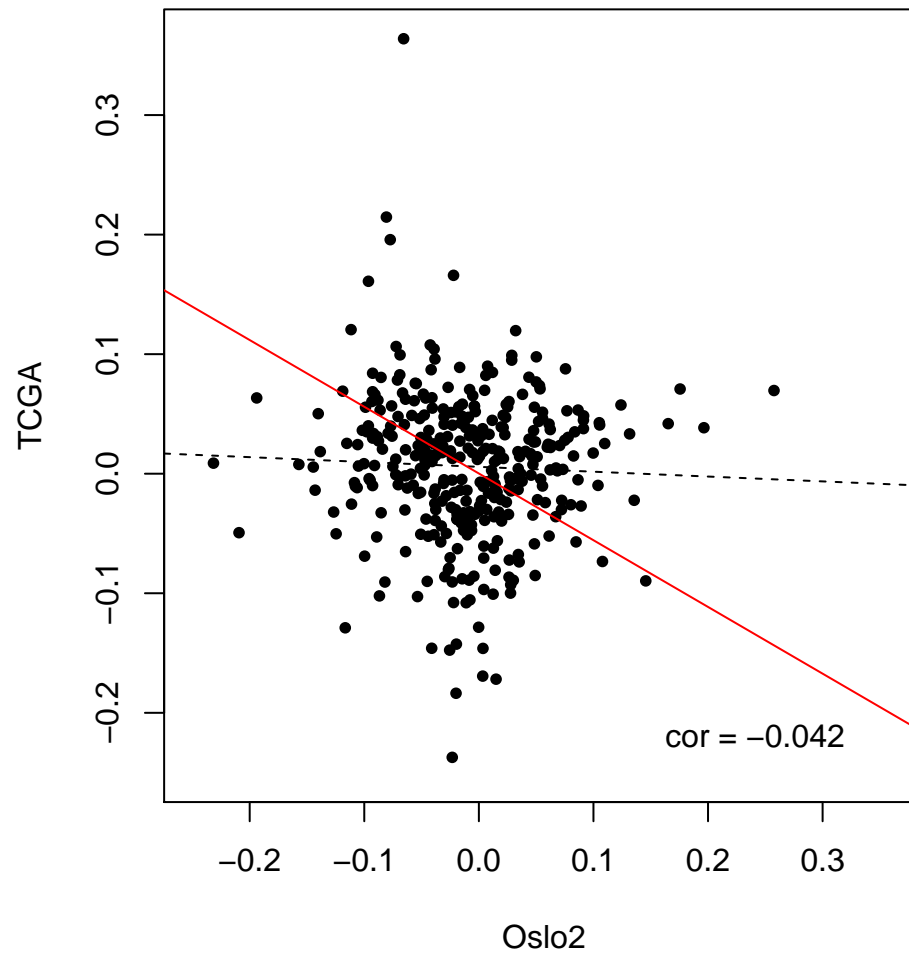



GSK3A

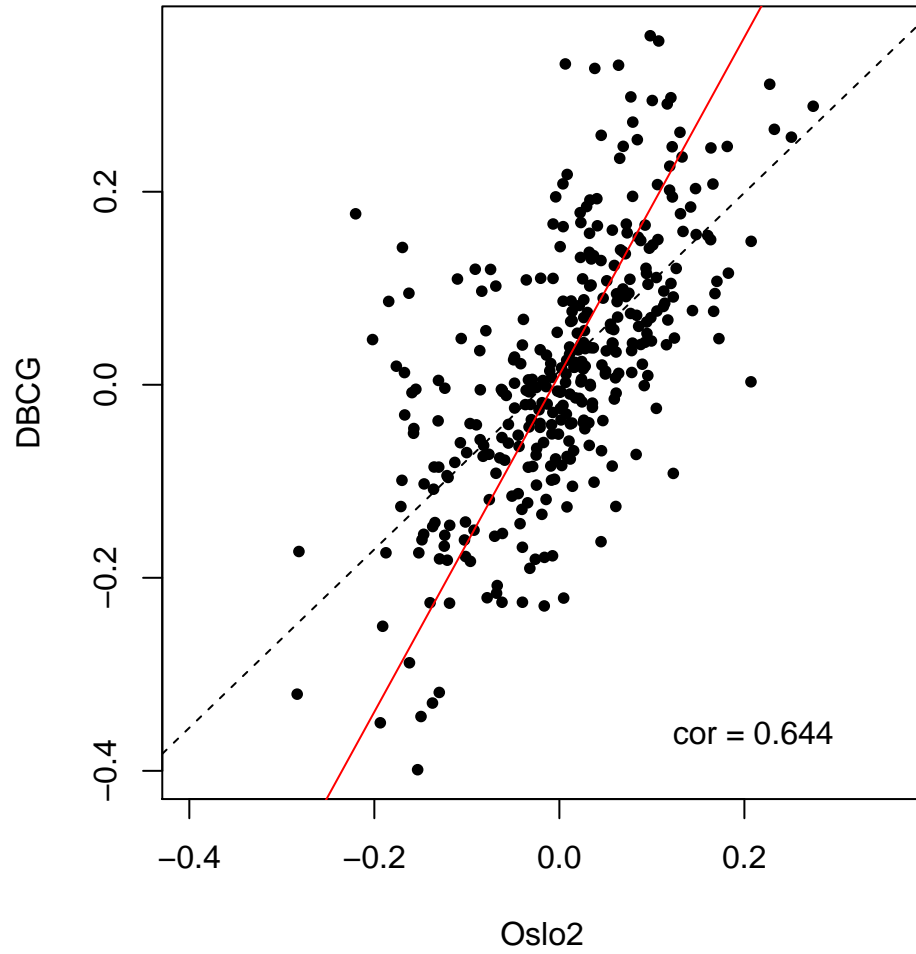

GSK3A

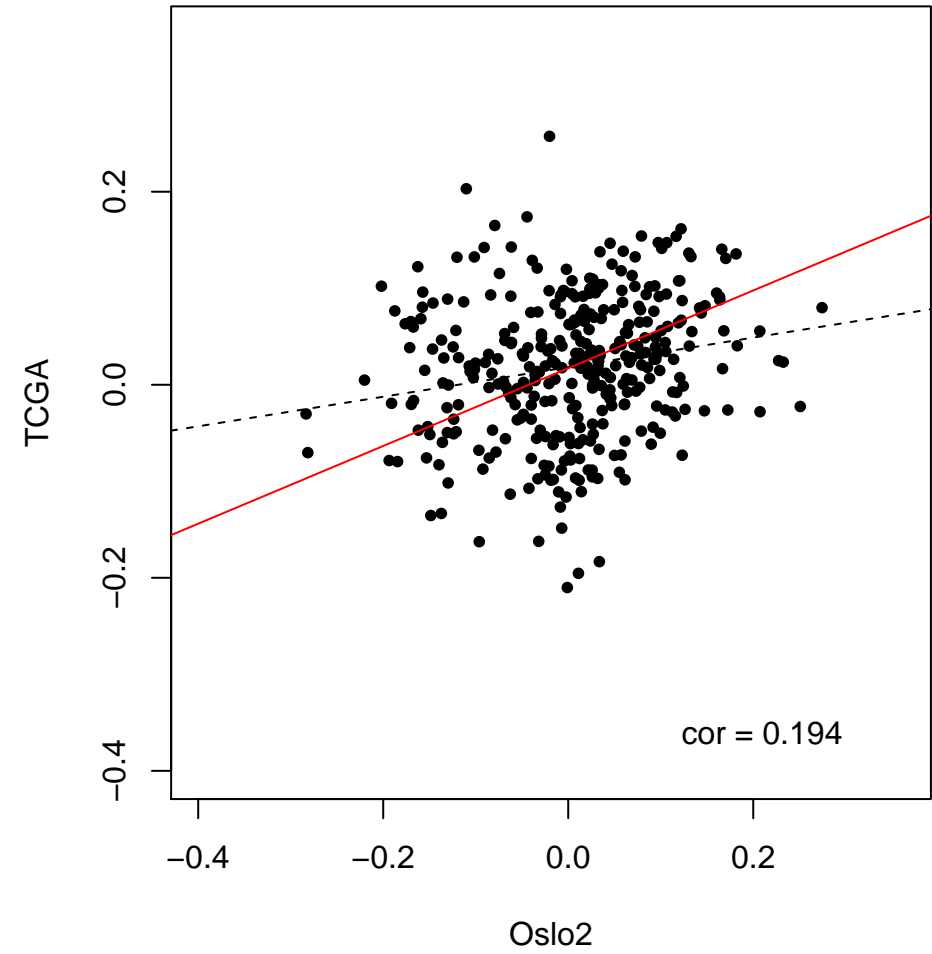

GSK3B

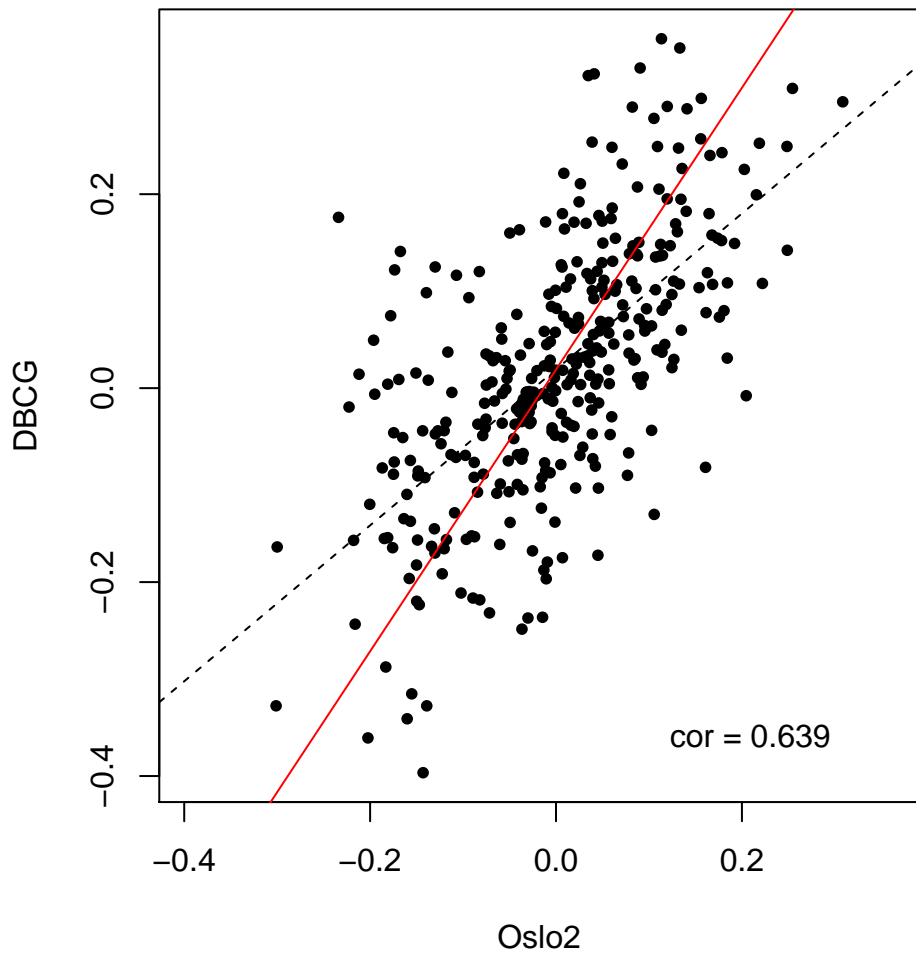

GSK3B

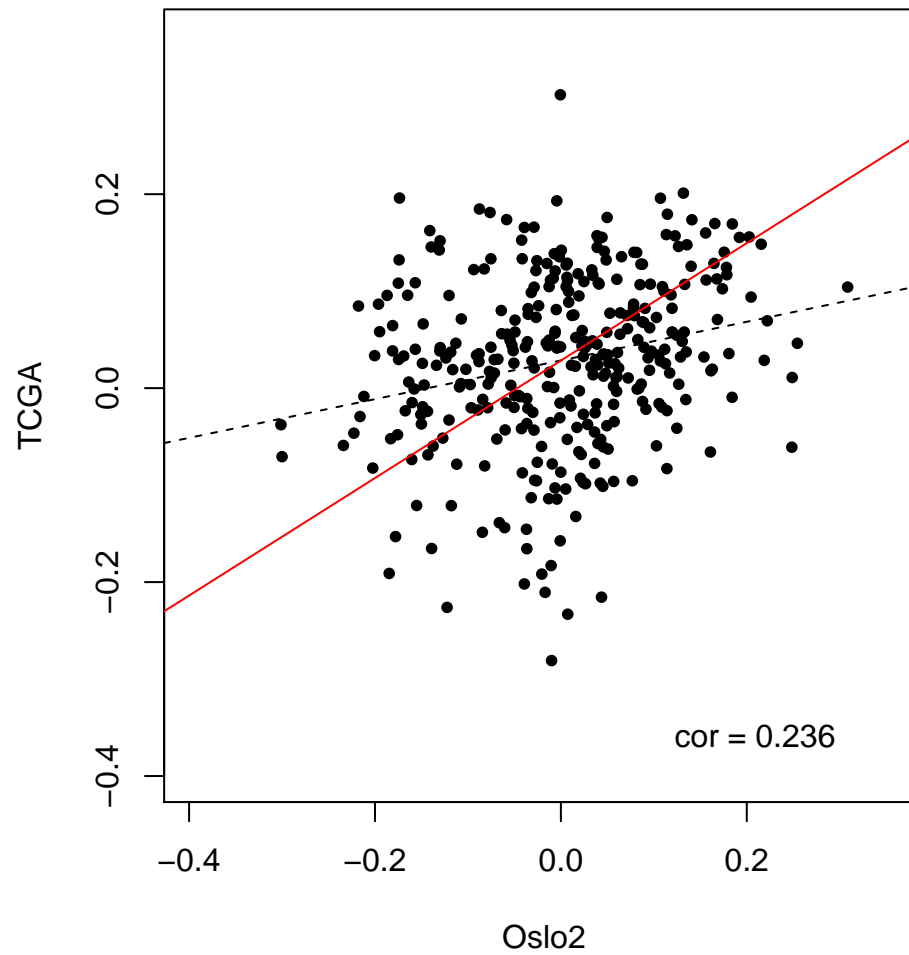

KDR

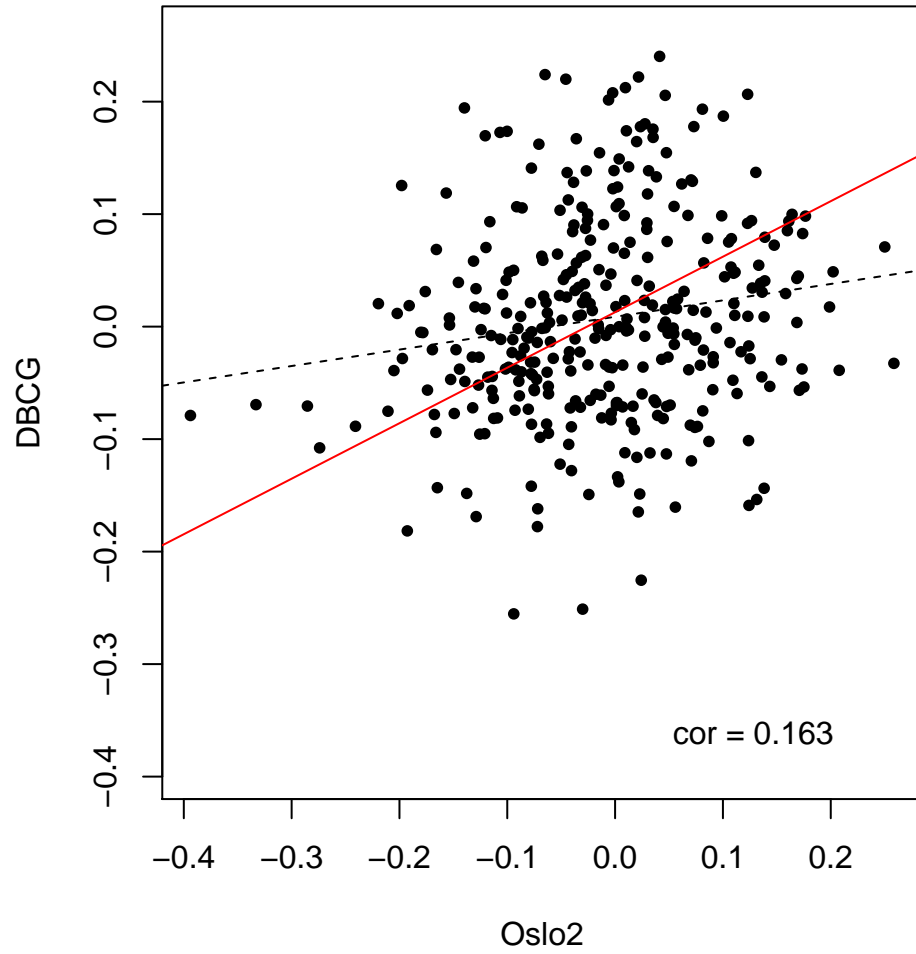

KDR

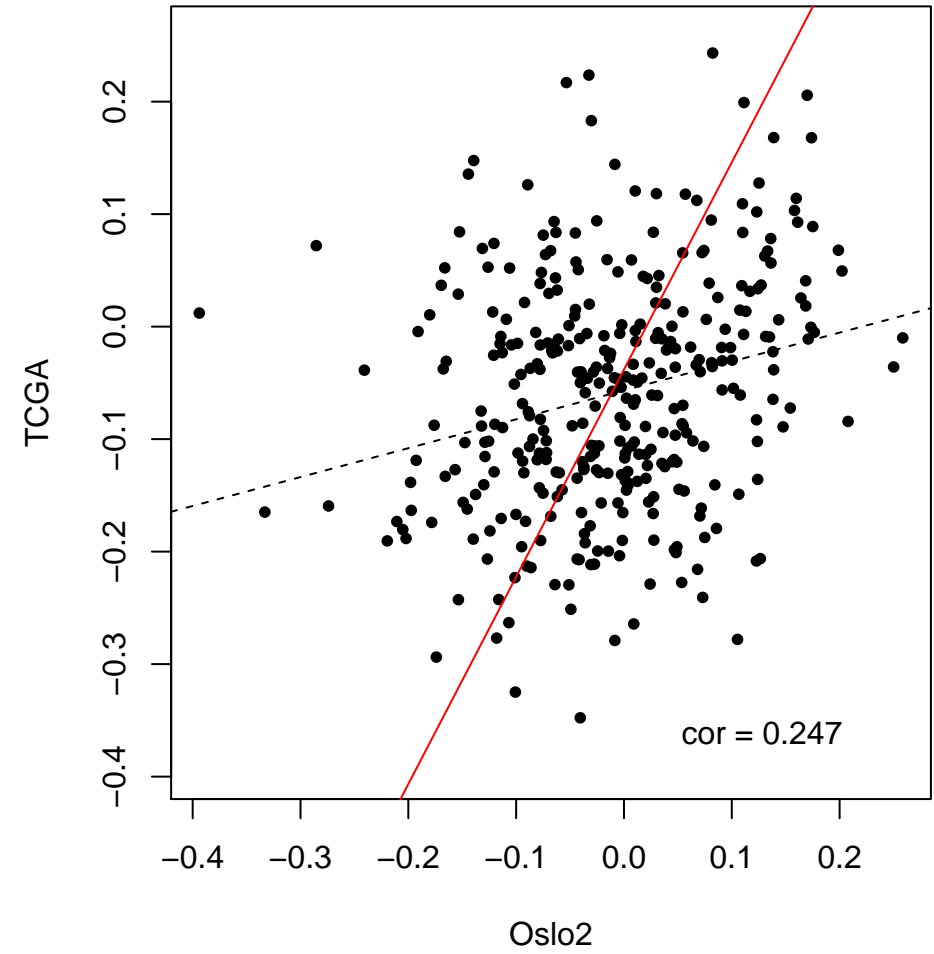

KIT

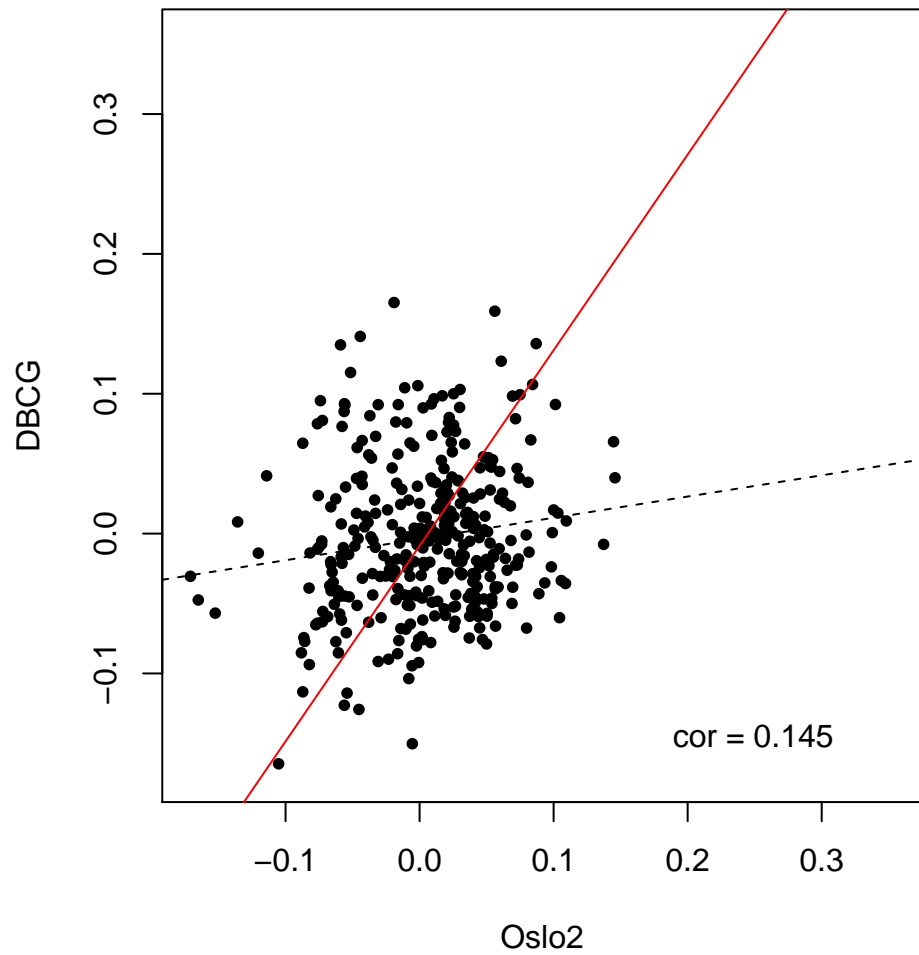

KIT

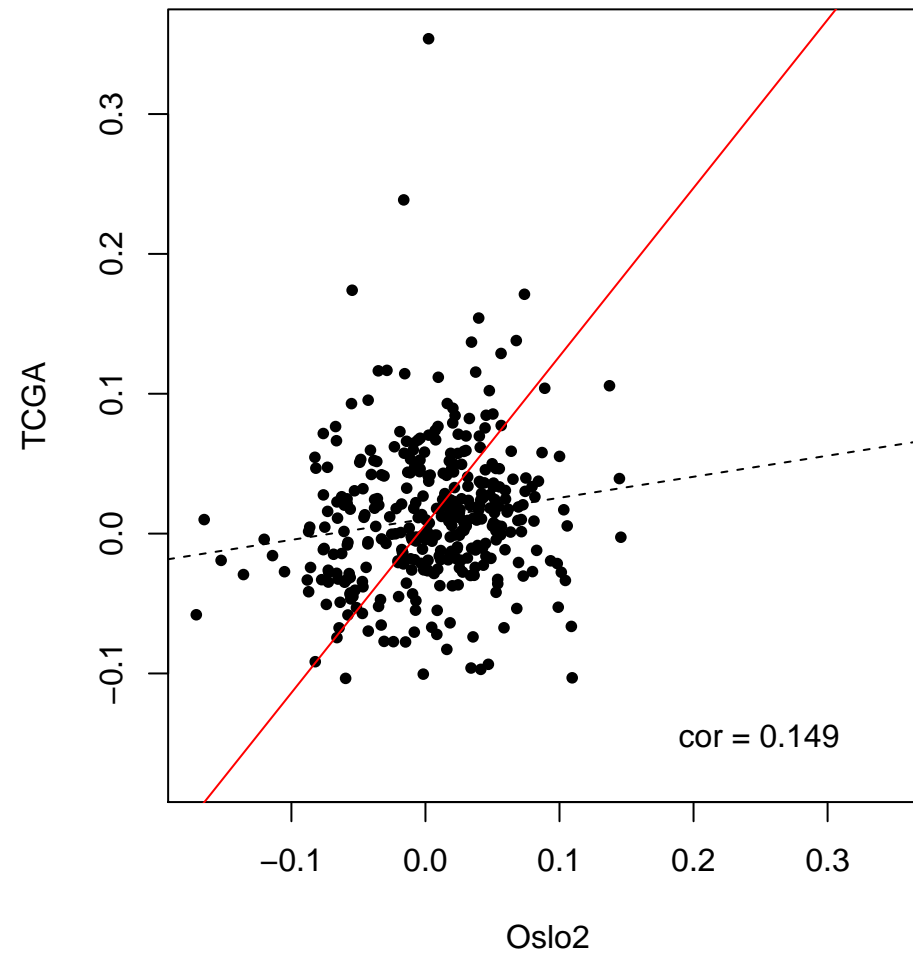

MAP2K1

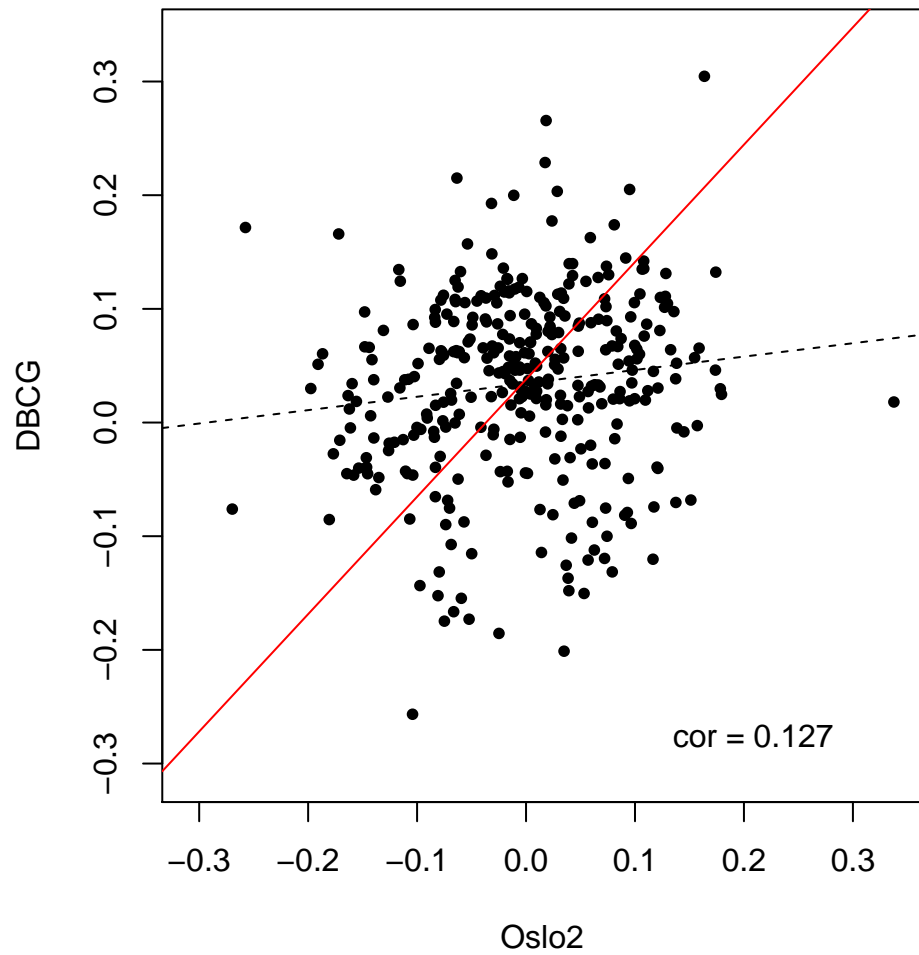

MAP2K1

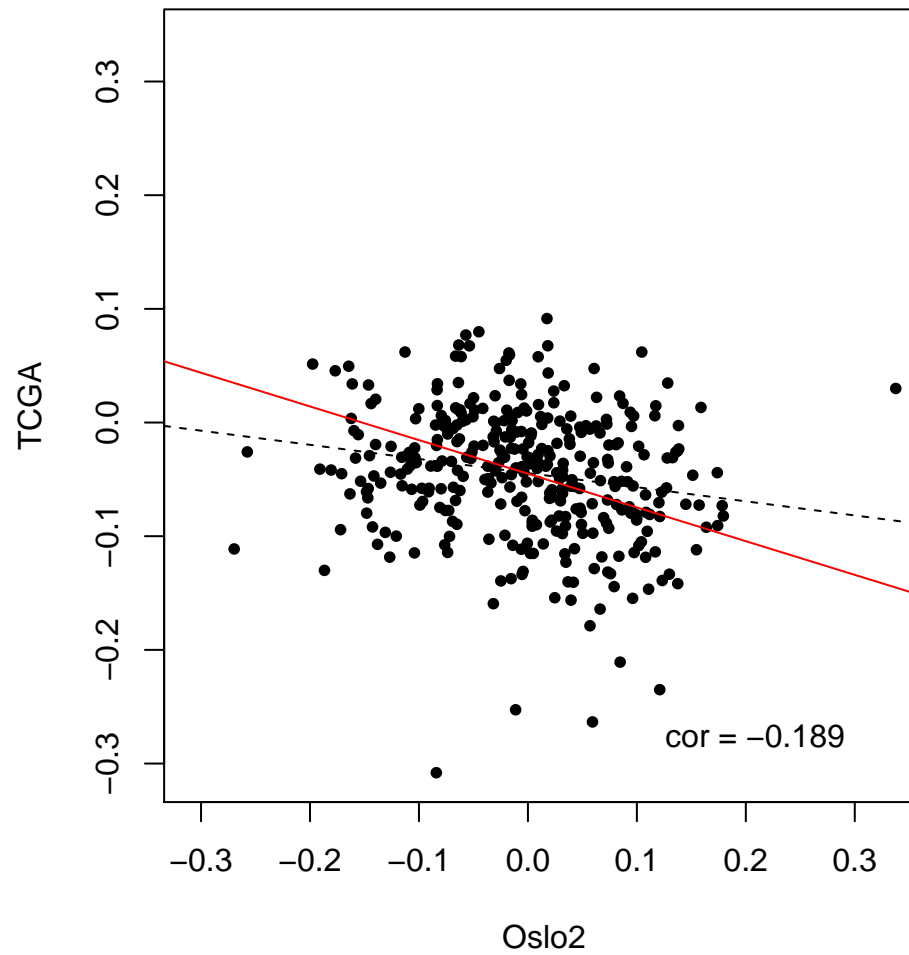

**MAPK14**

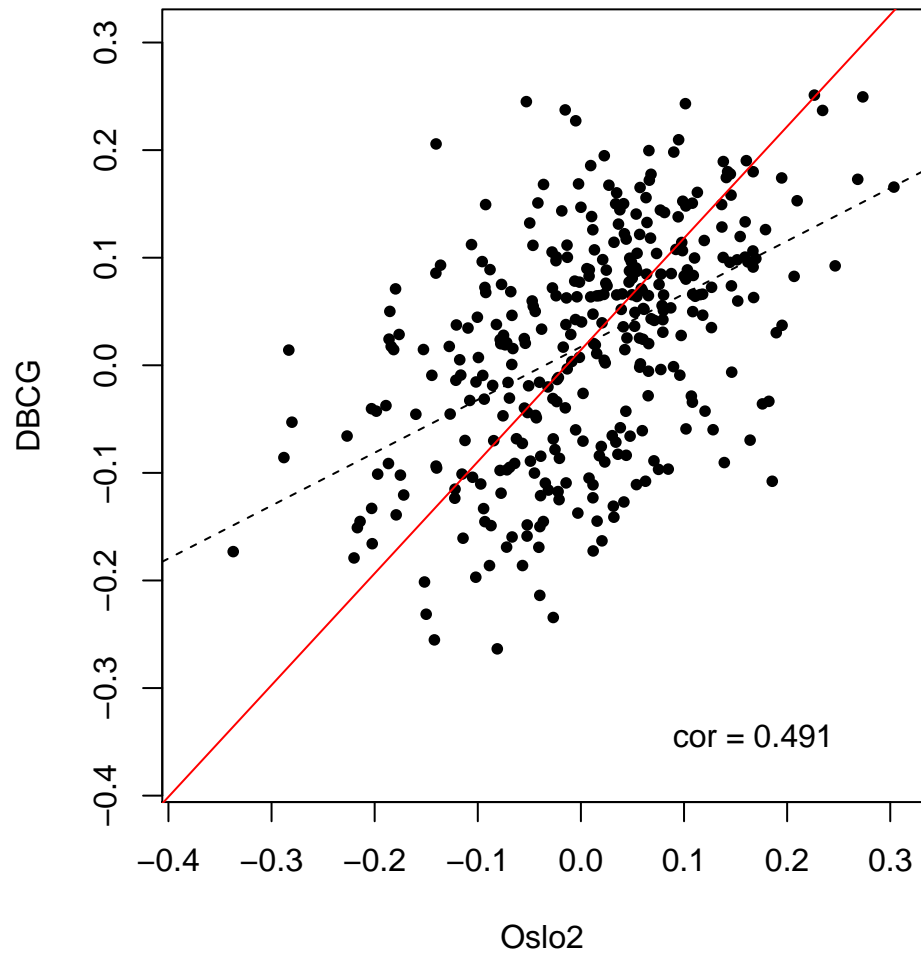

**MAPK14**

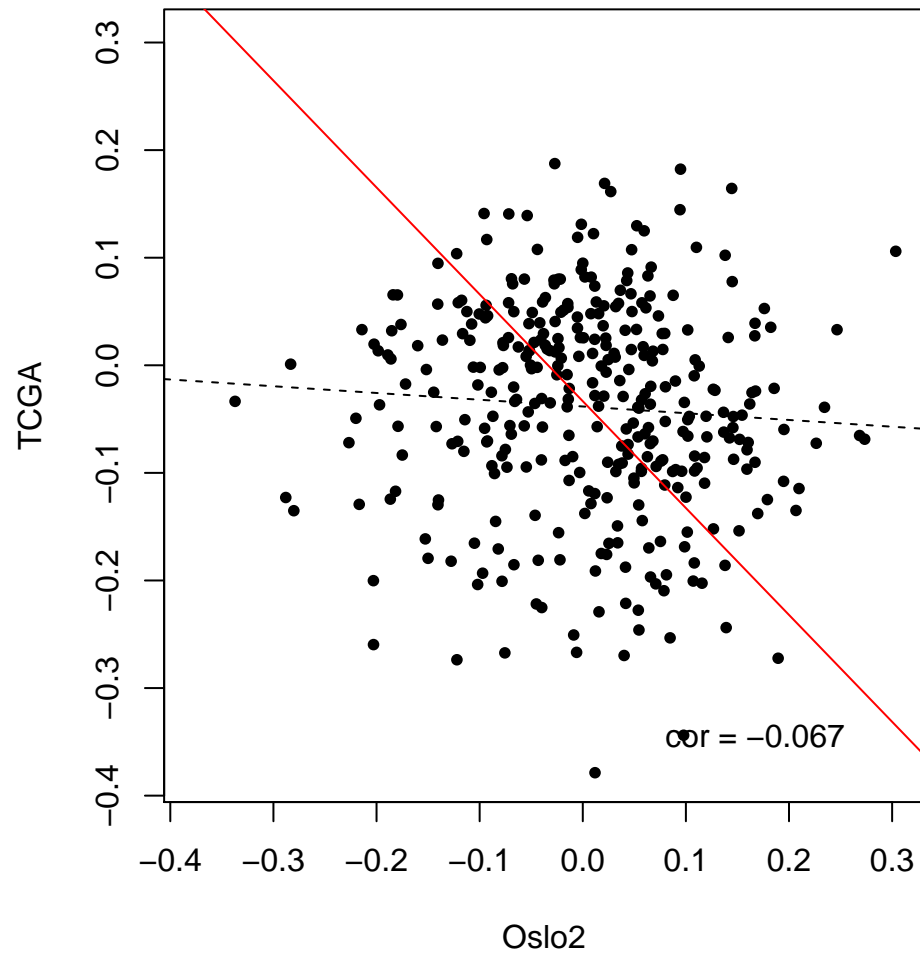

MYC

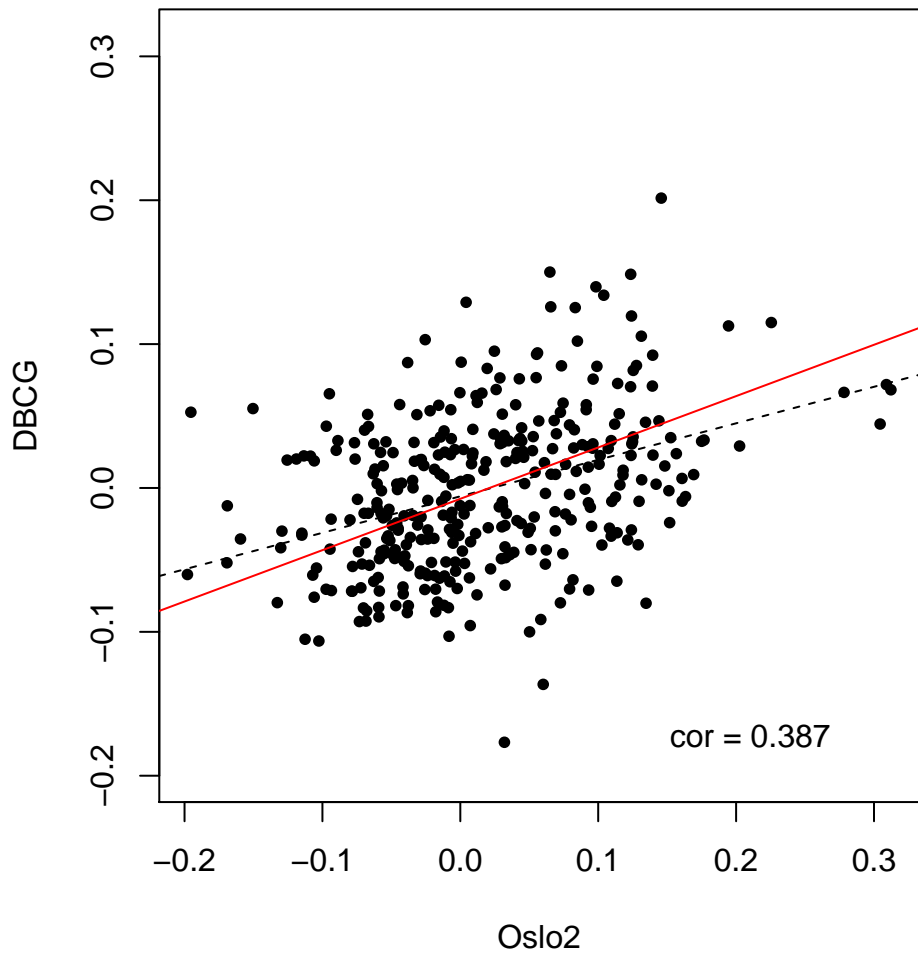

MYC

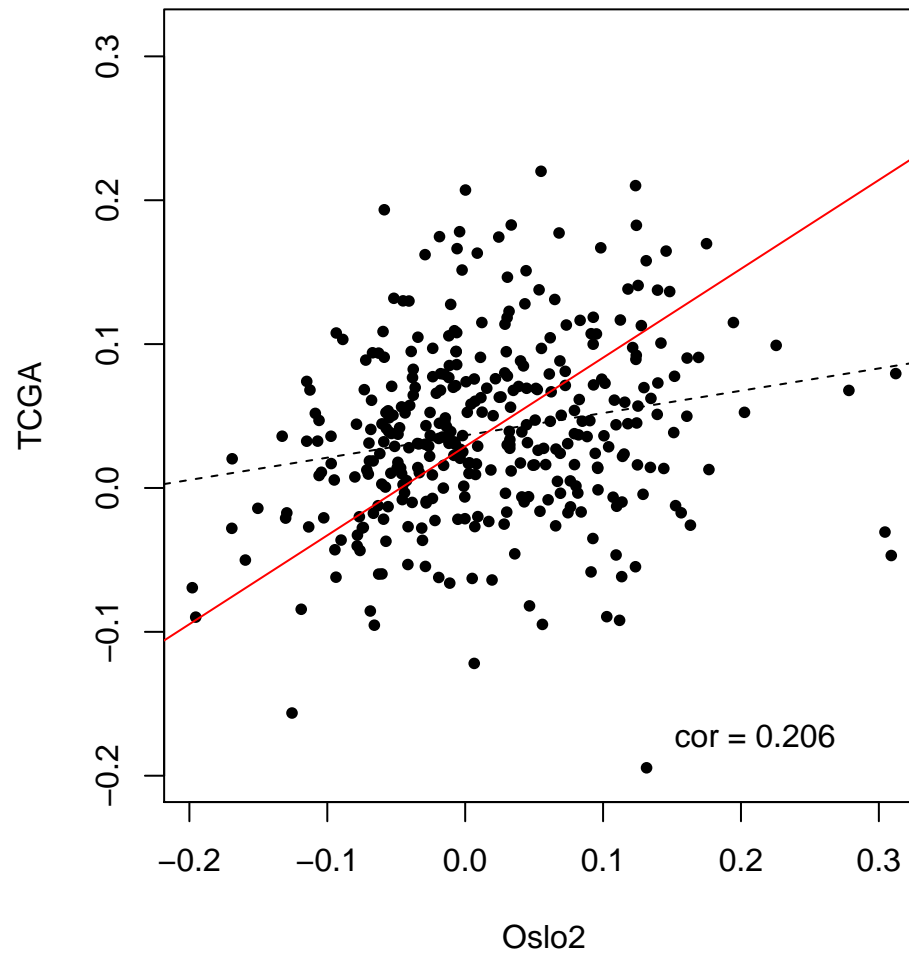

PECAM1

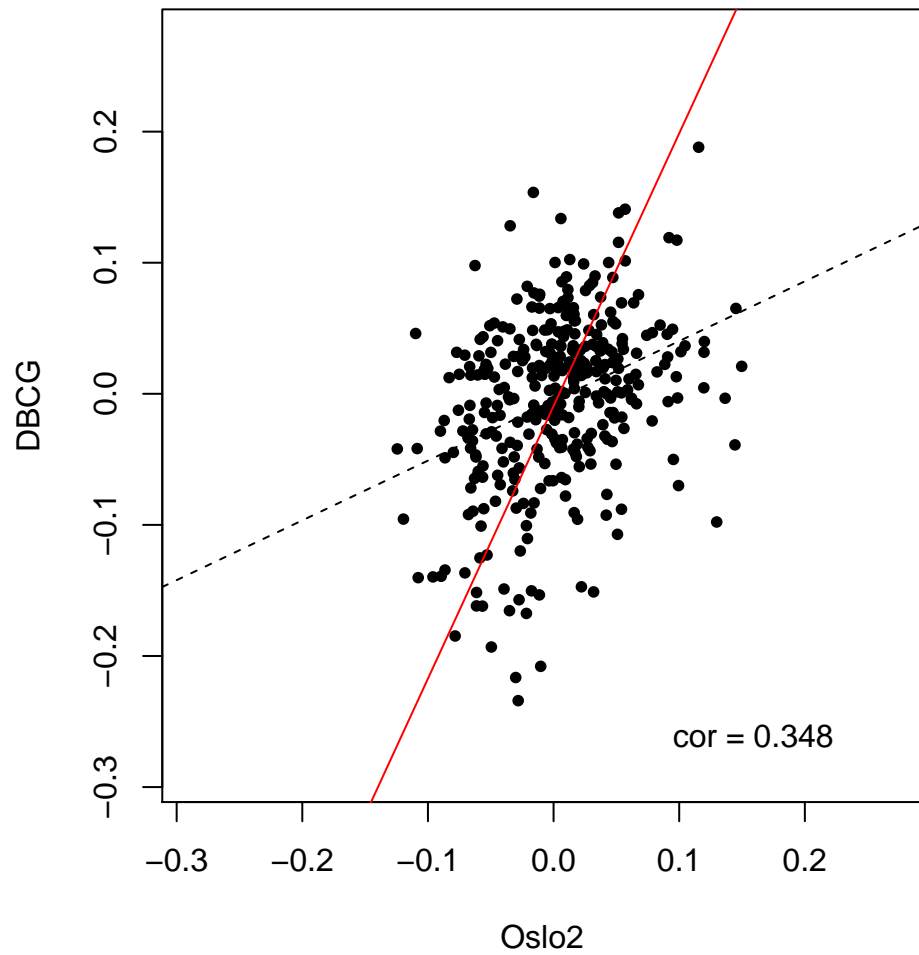

PECAM1

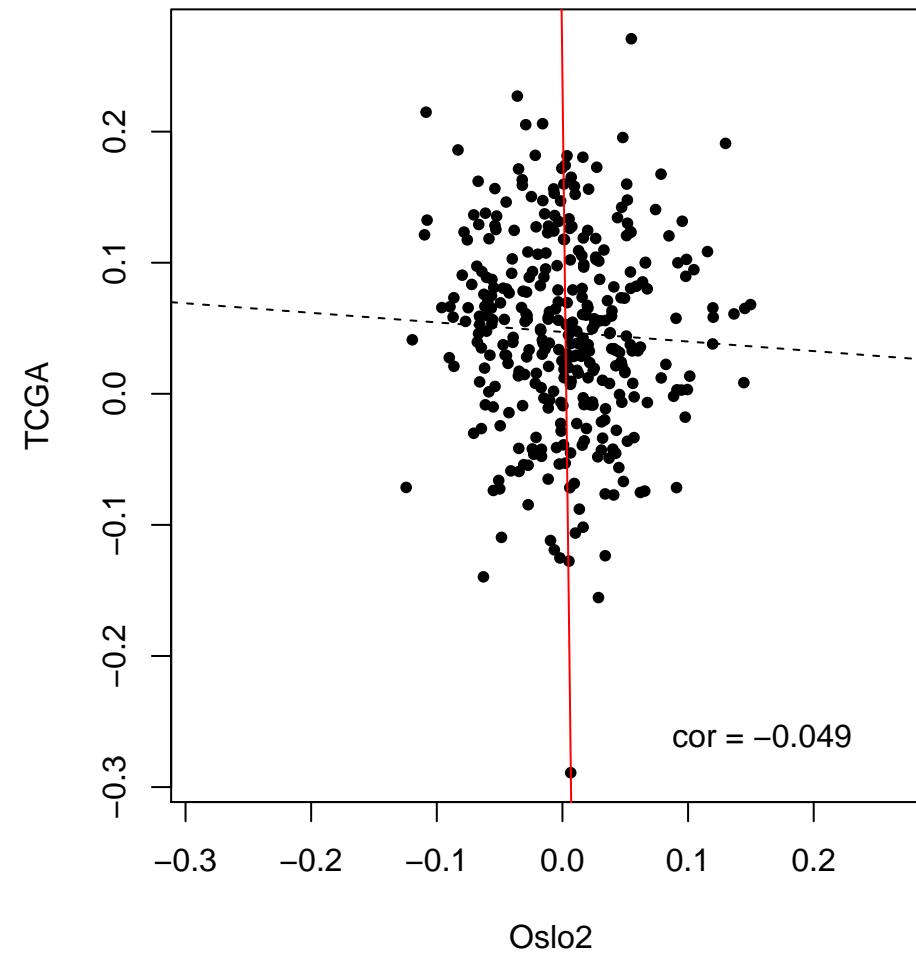



PGR

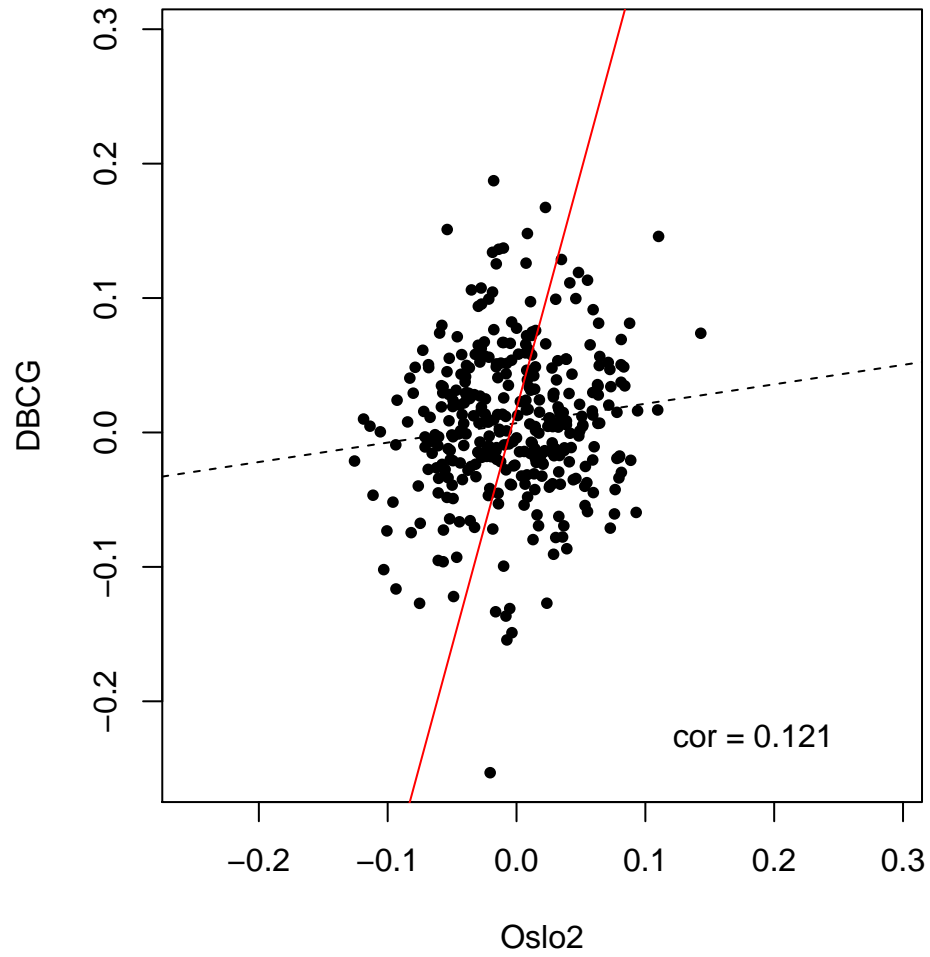

PGR

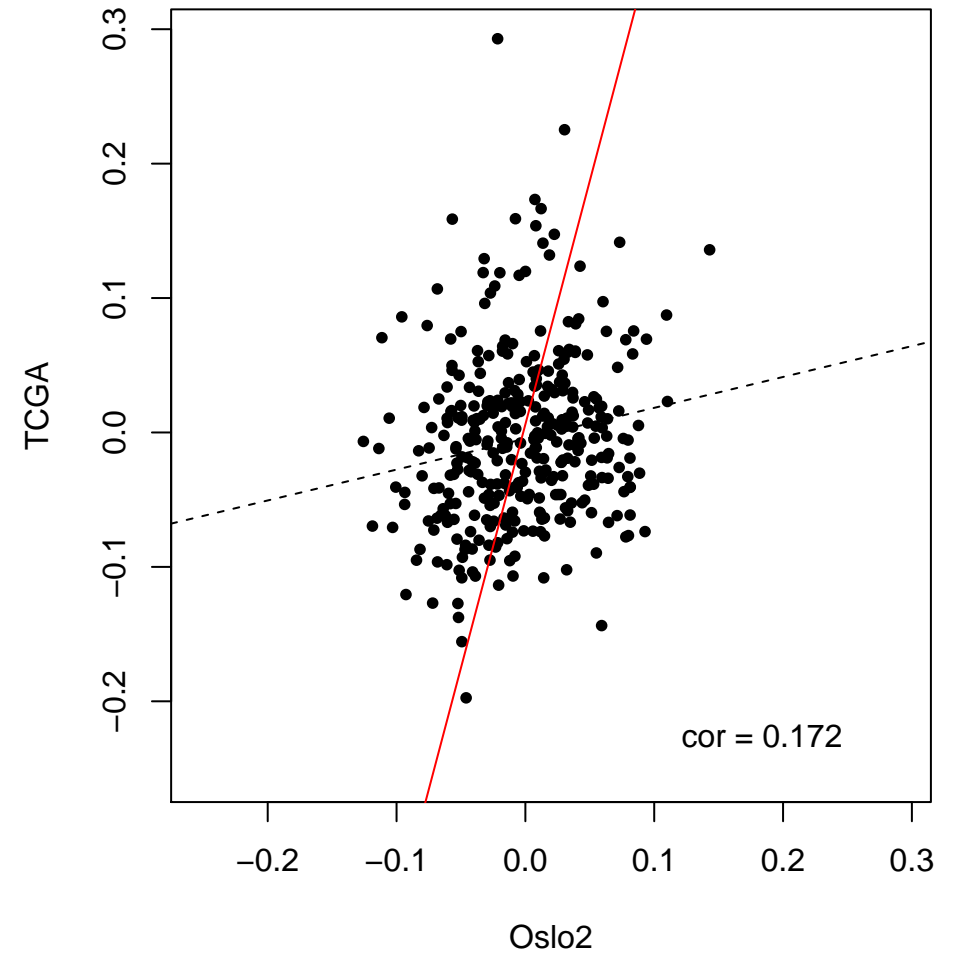

PIK3CA

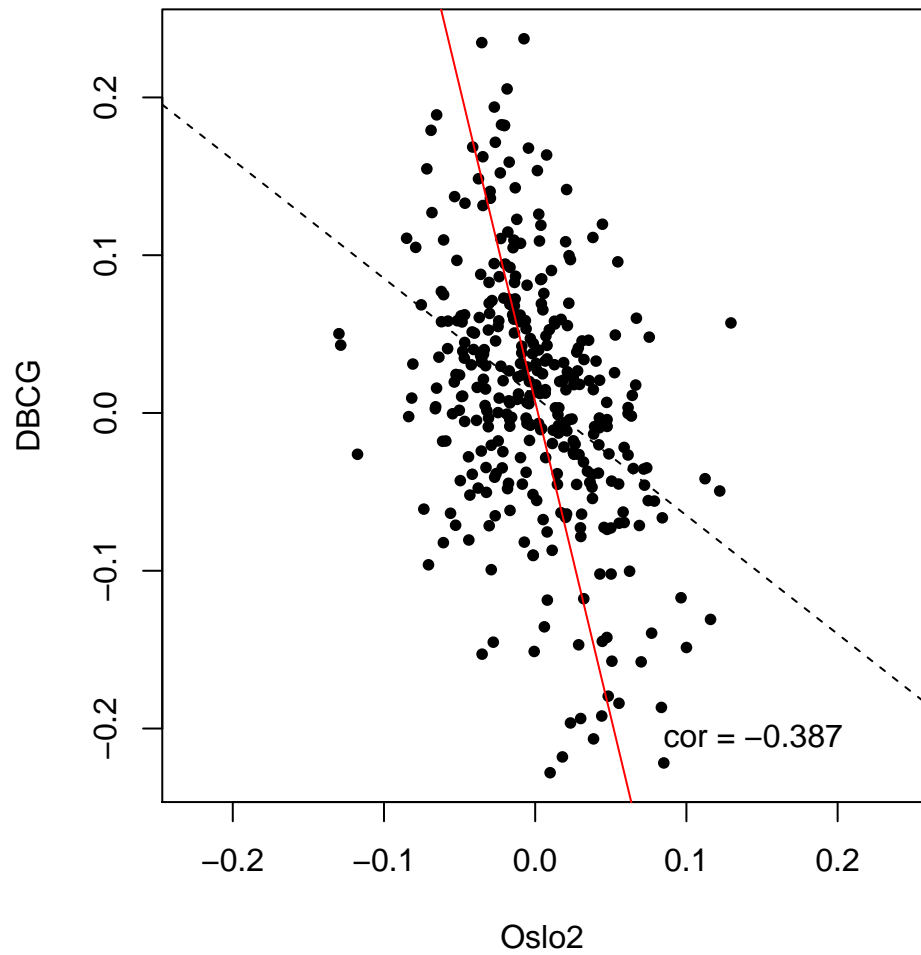

PIK3CA

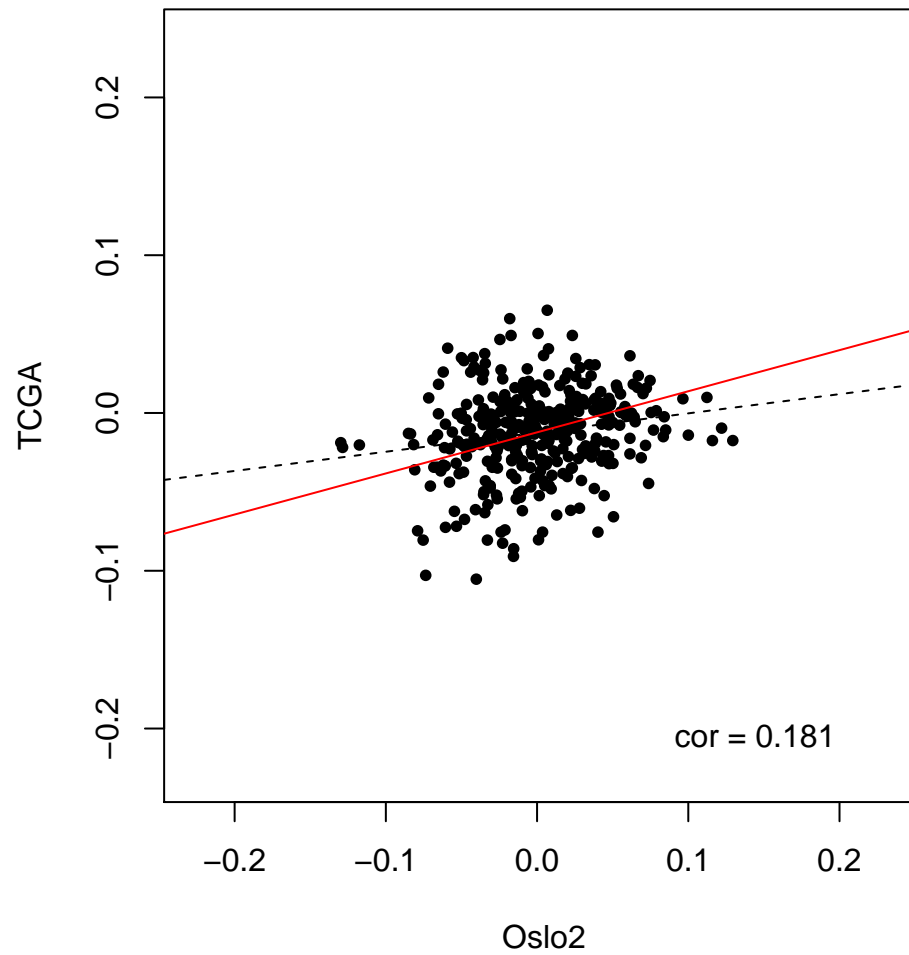

PRKCA

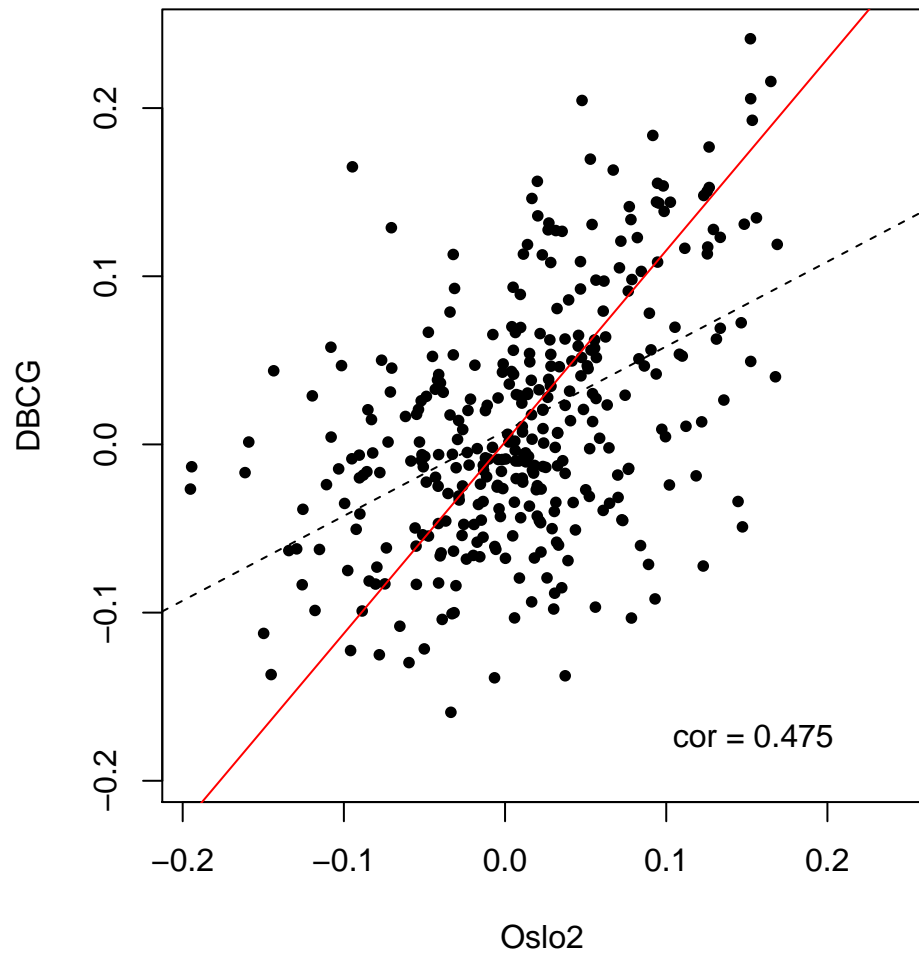

PRKCA

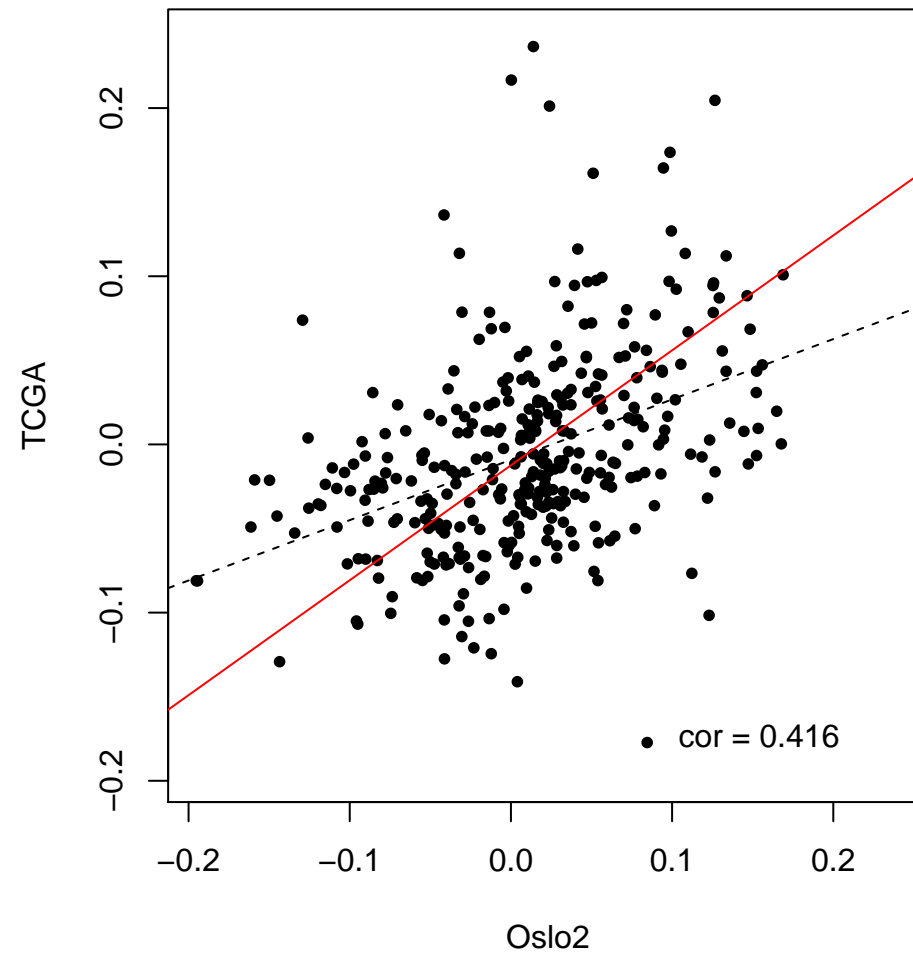

PRKAA1

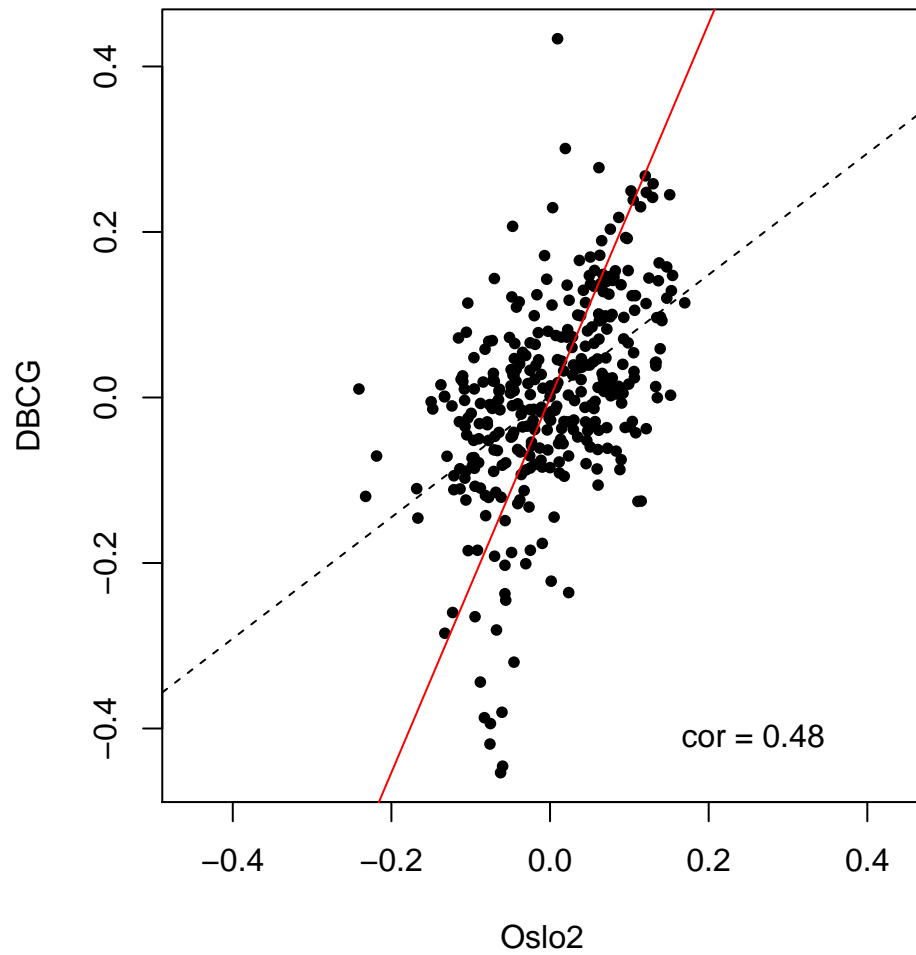

PRKAA1

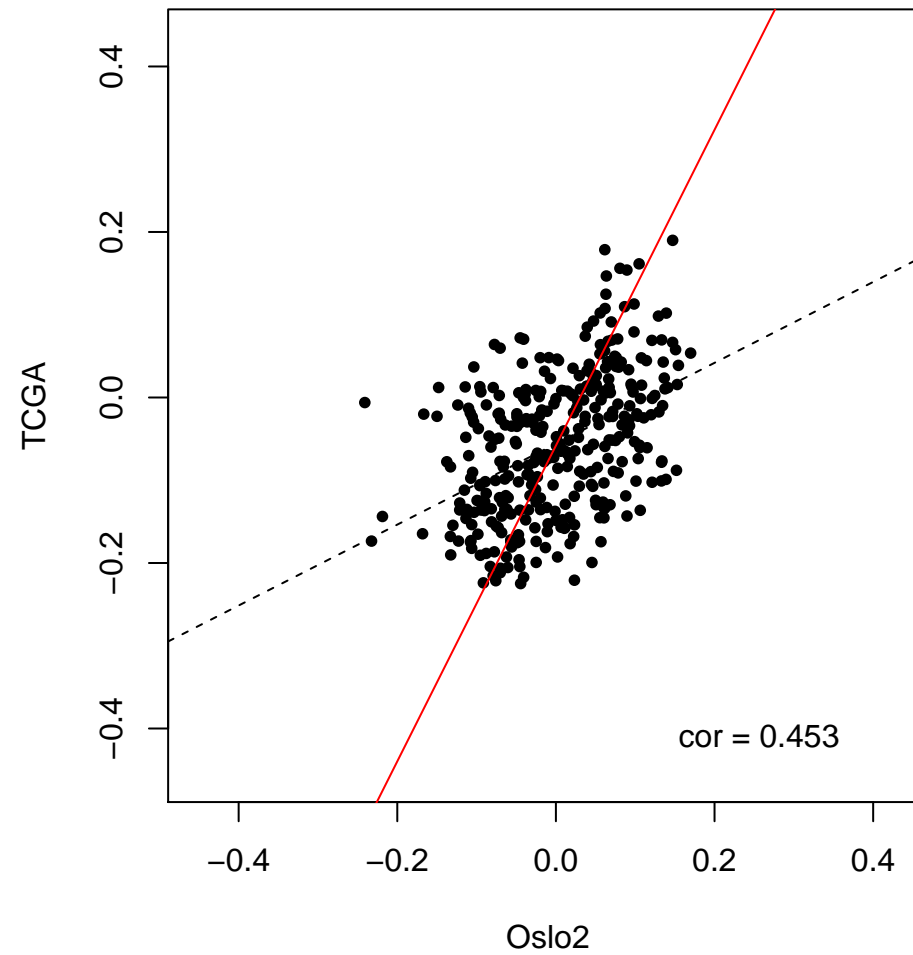

**PTEN**

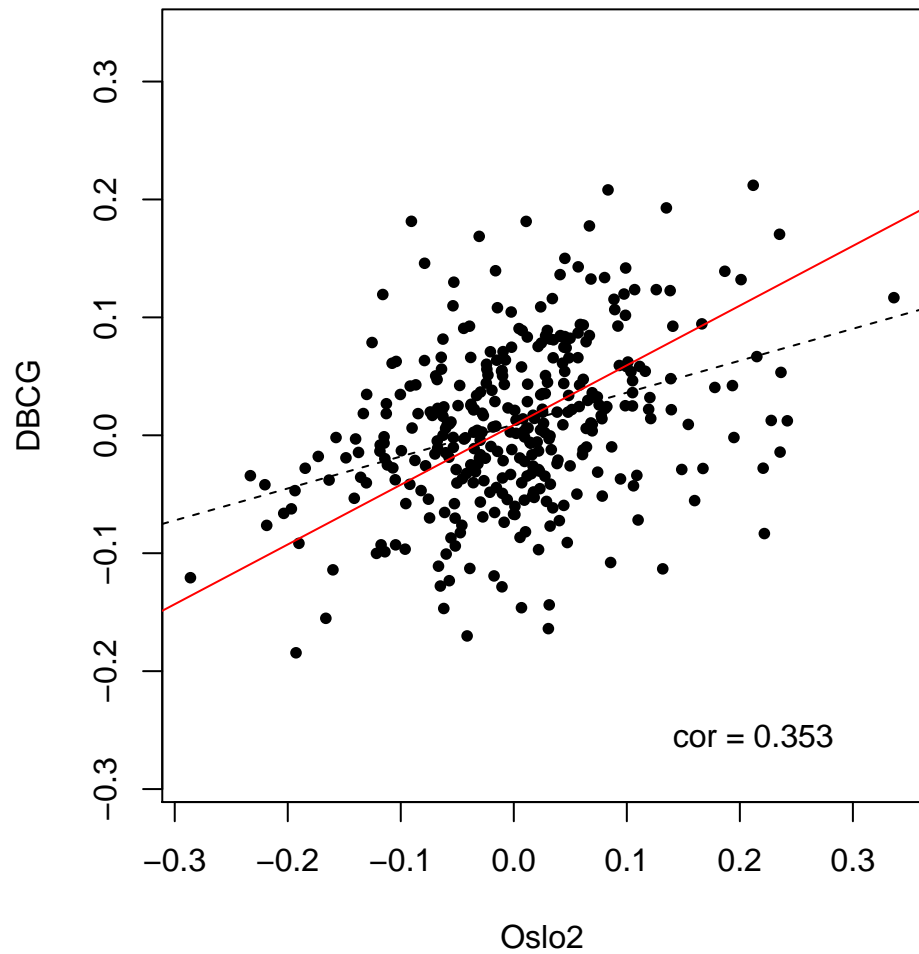

**PTEN**

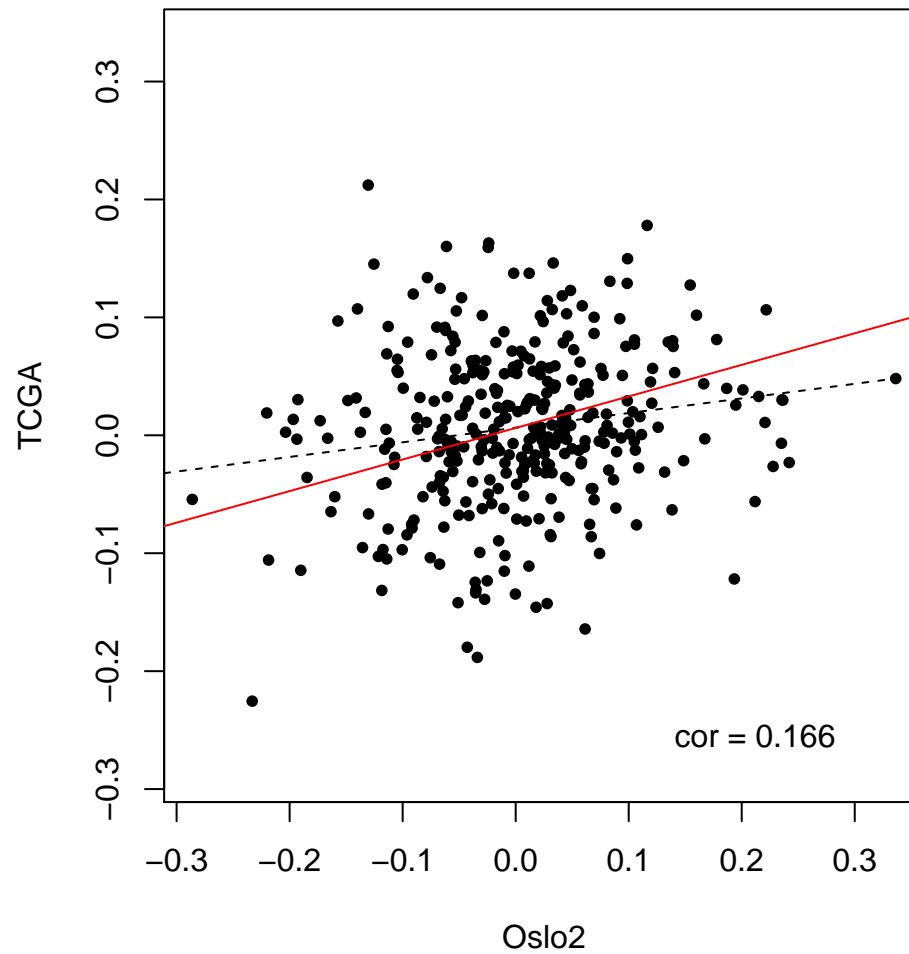

RPS6KB1

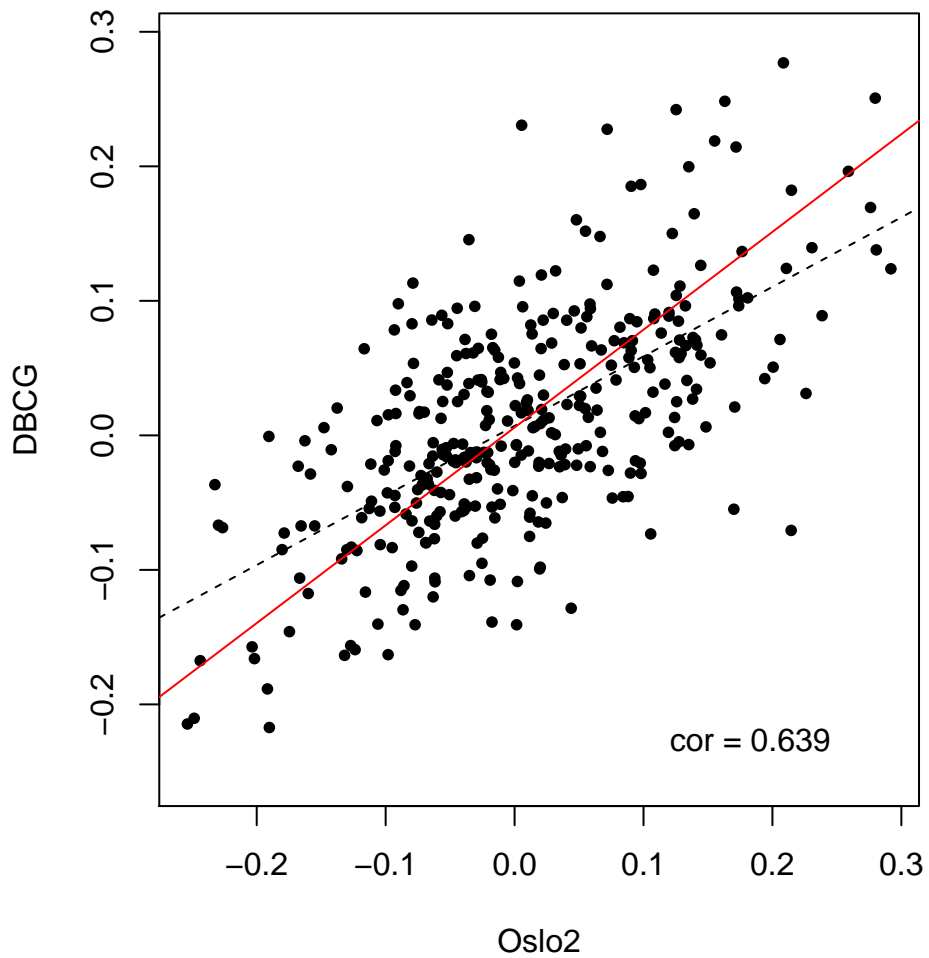

RPS6KB1

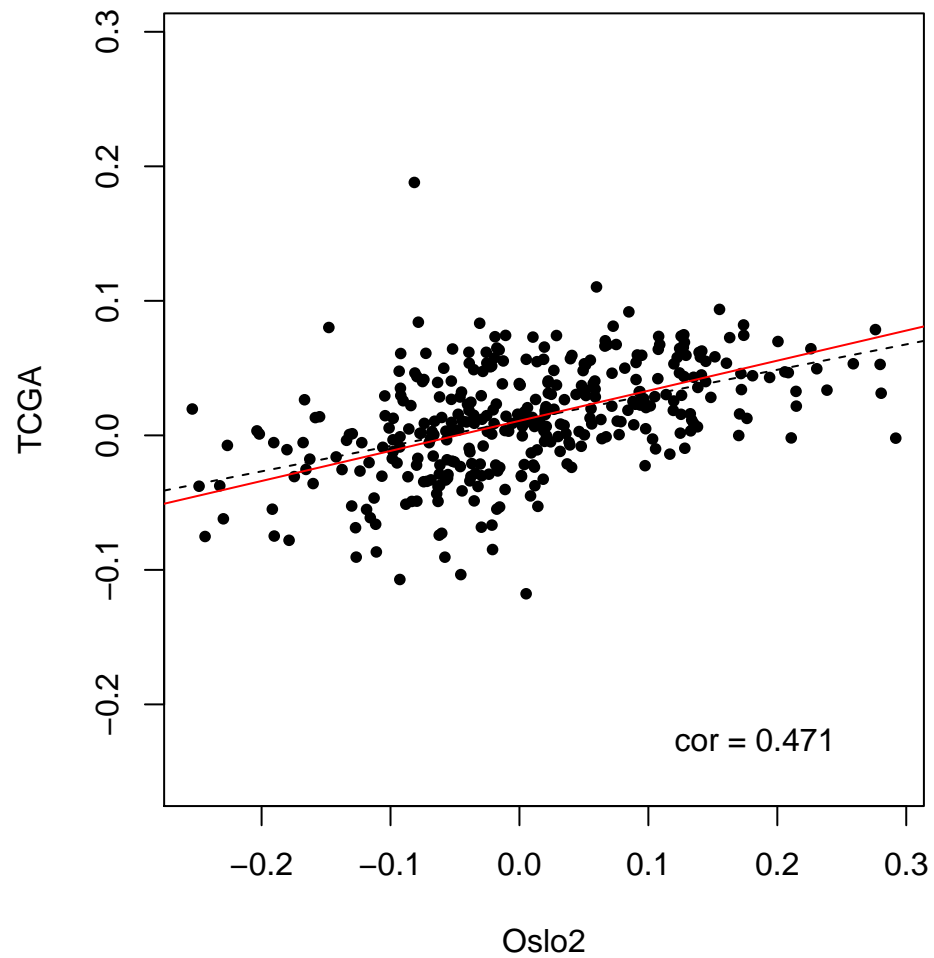

SRC

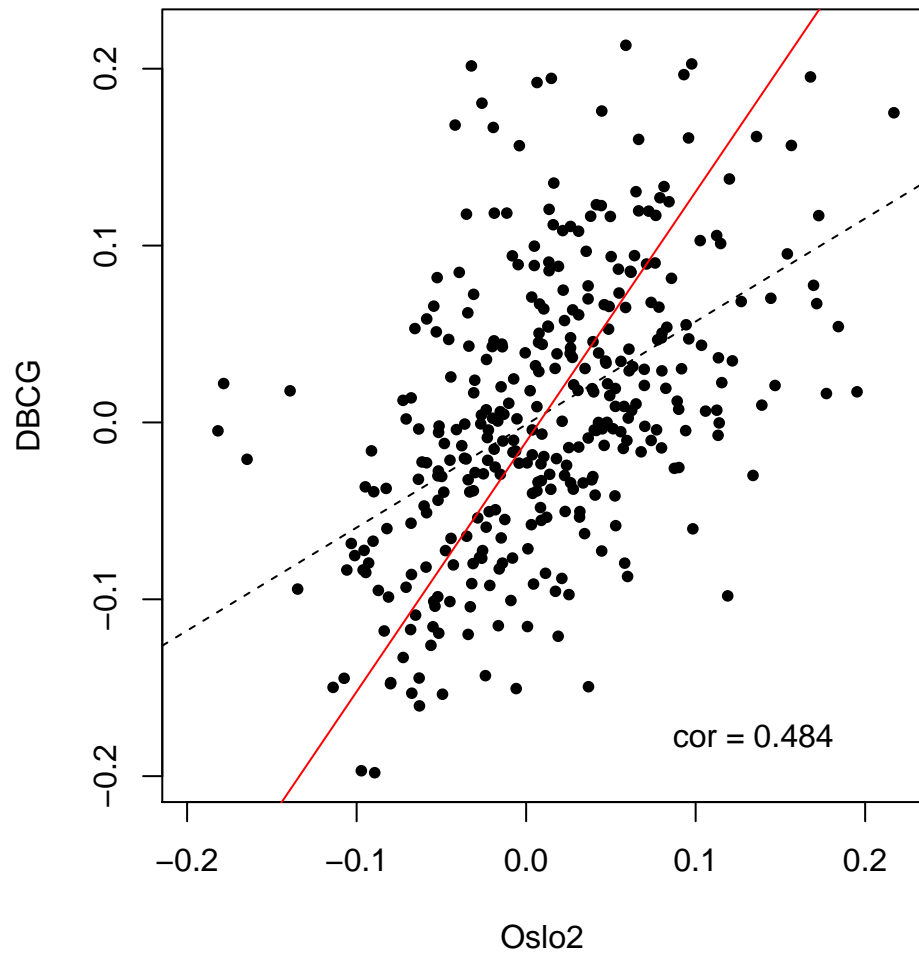

SRC

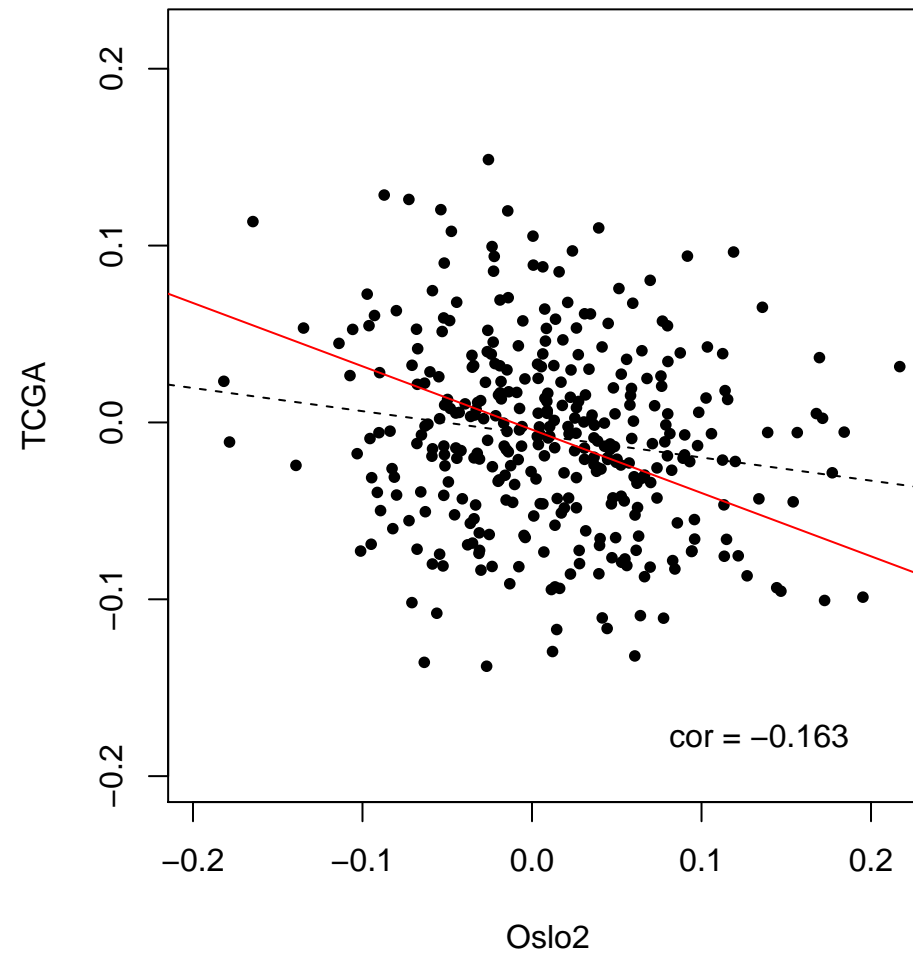

STMN1

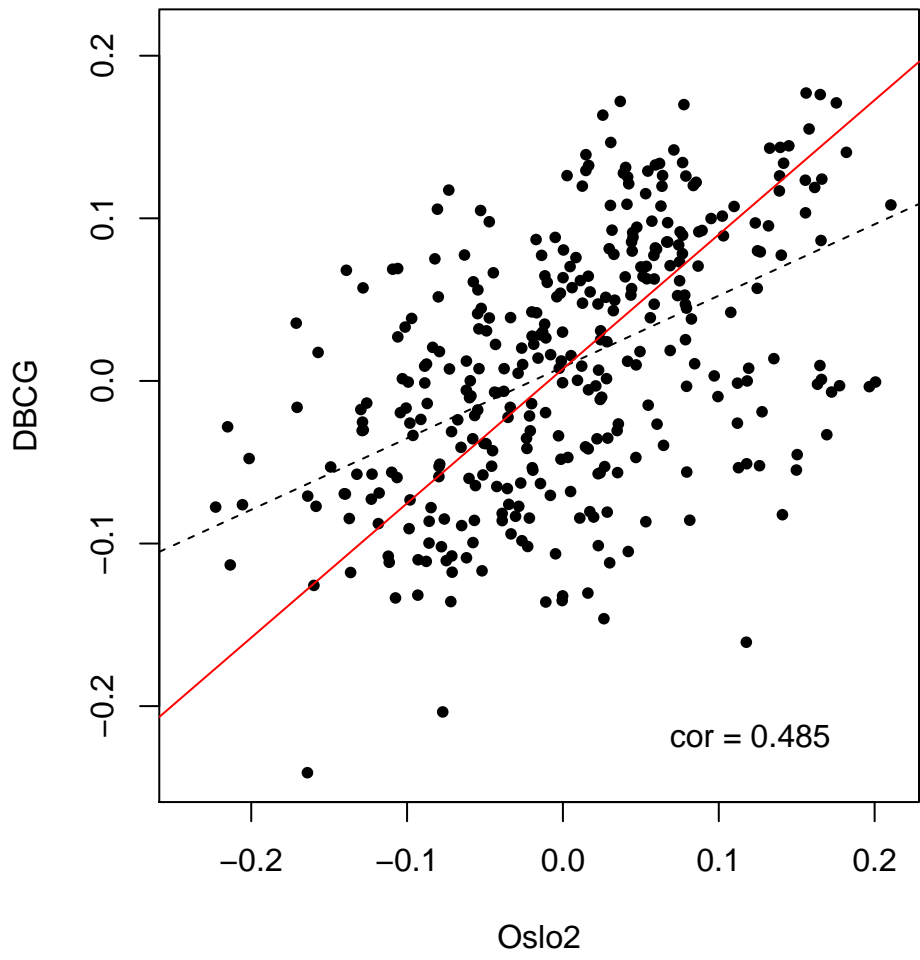

STMN1

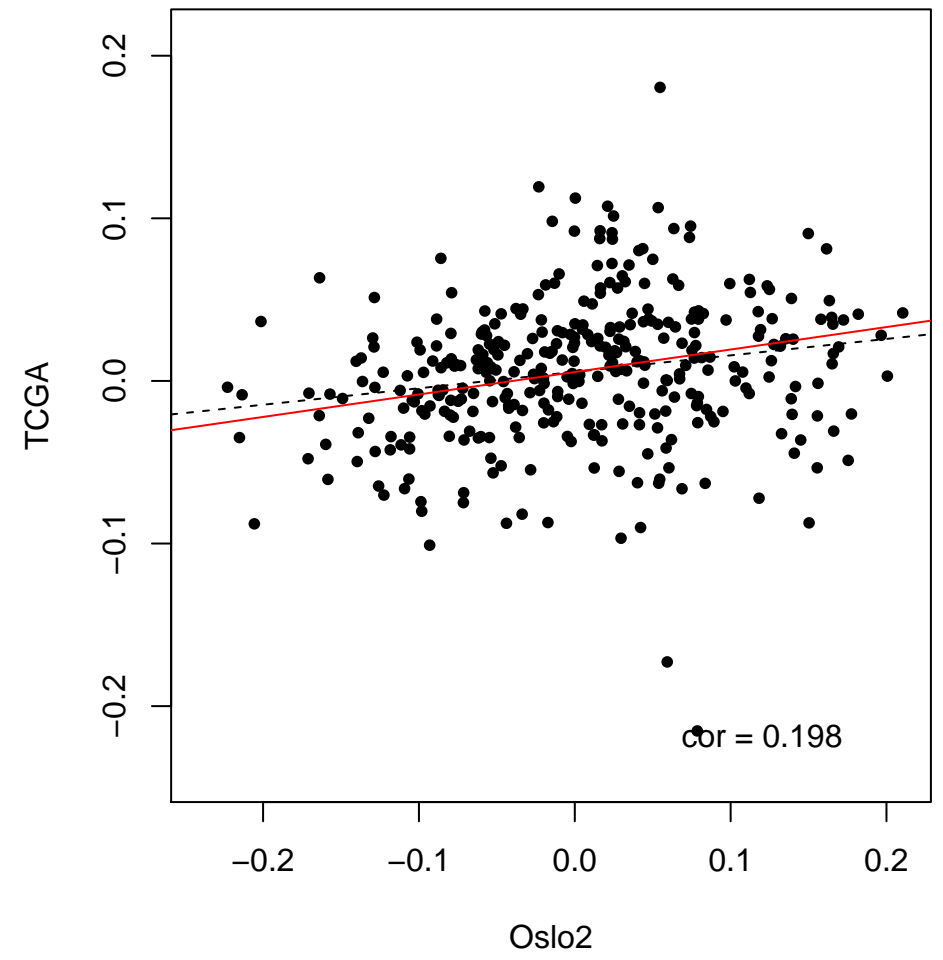



**TP53**

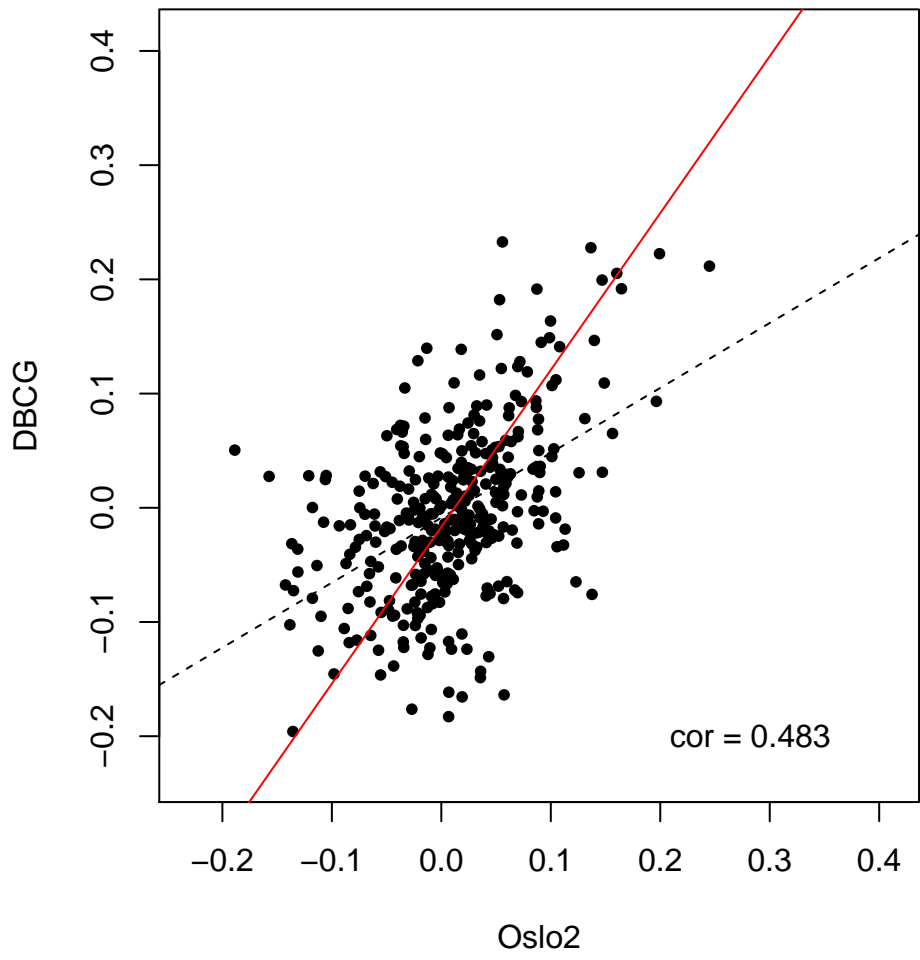

**TP53**

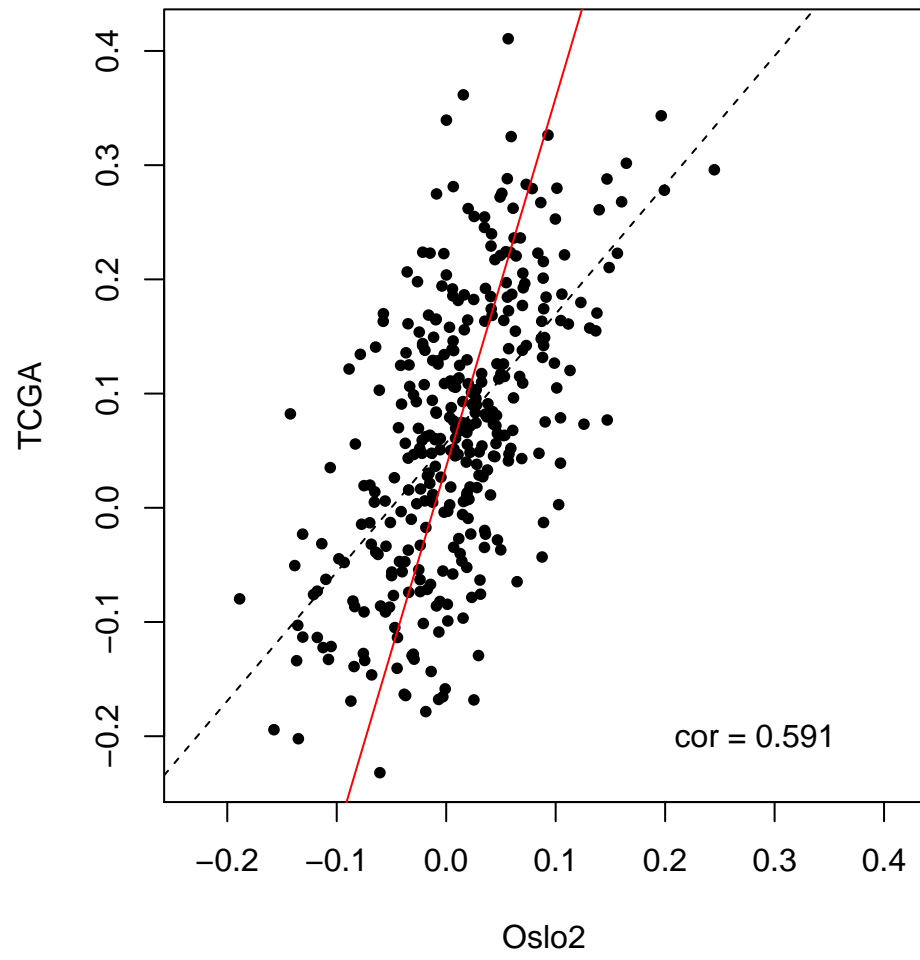

TSC2

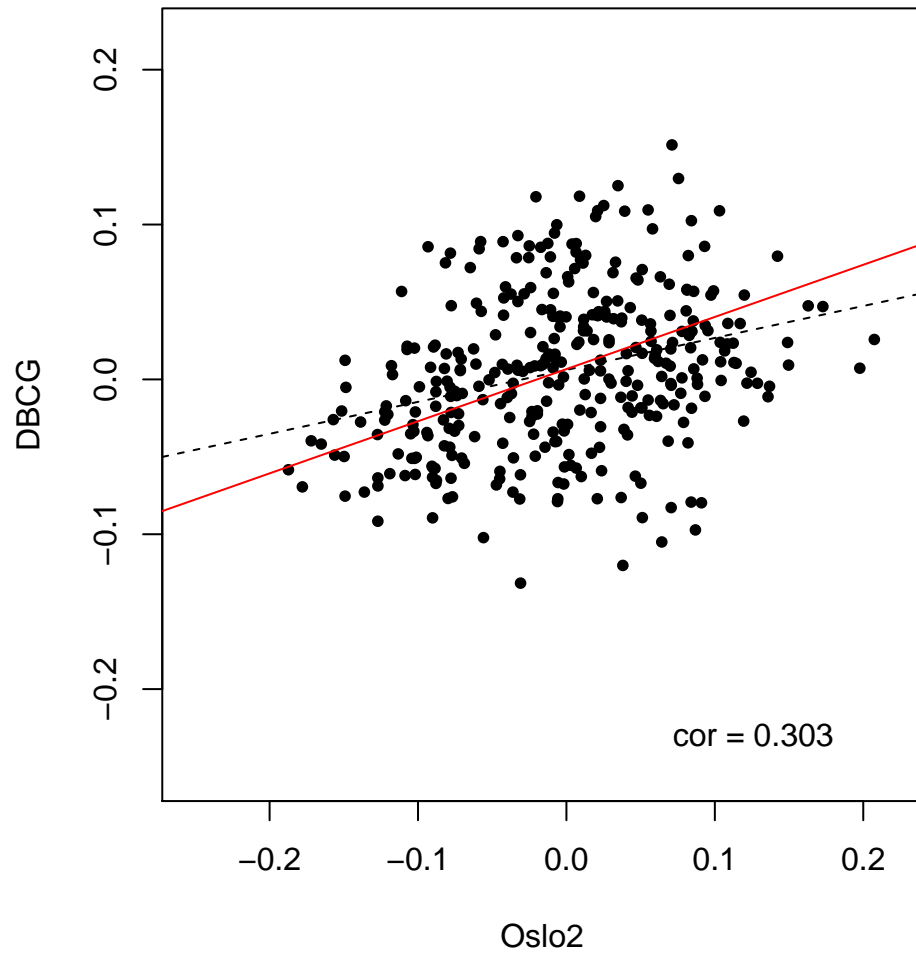

TSC2

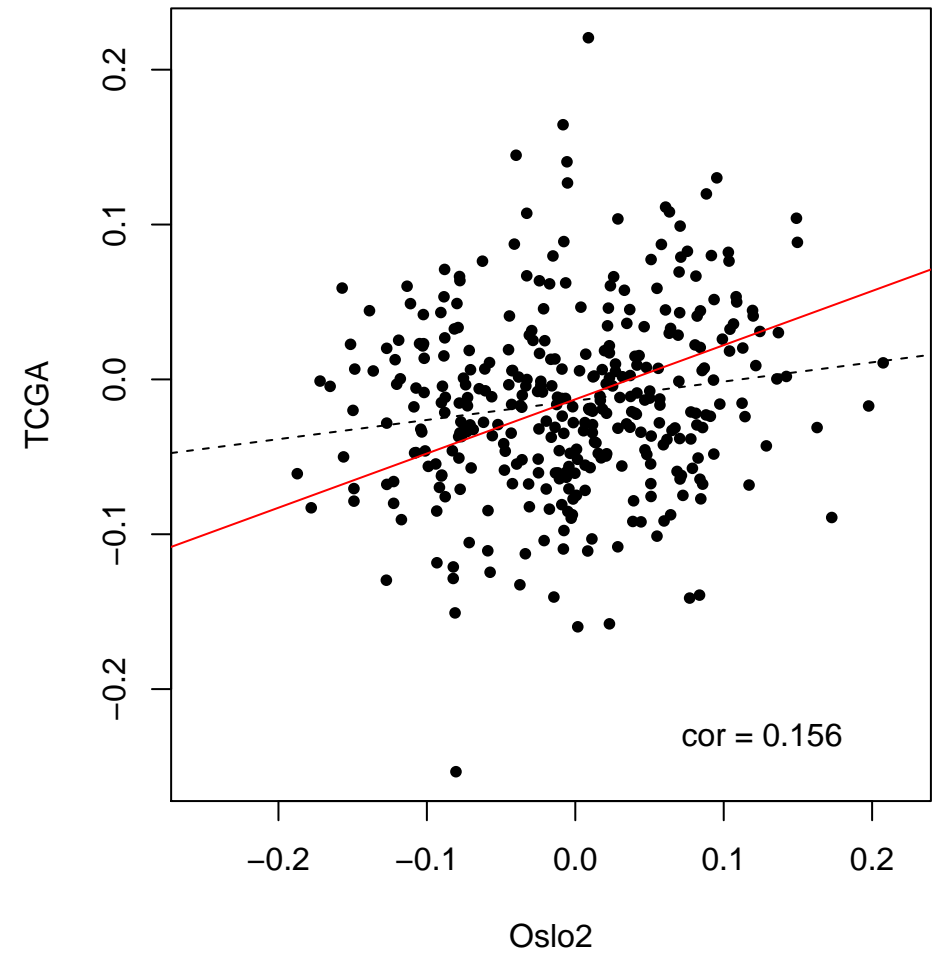

Supplement: 13073_2015_135_MOESM13_ESM.pdf [file 13073_2015_135_MOESM13_ESM.pdf]
