# Supplementary material for: Integrated analysis reveals microRNA networks coordinately expressed with key proteins in breast cancer
Source: PubMed Central journal article supplement (PMC4396592; doi:10.1186/s13073-015-0135-5), 2015-02-02

| <b>Gene symbol</b> | <b>Protein</b>  | <b>Pearson correlation predicted vs. measured protein in DBCG</b> | <b>Correlation p-value in DBCG</b> | <b>Pearson correlation predicted vs. measured protein in TCGA</b> | <b>Correlation p-value in TCGA</b> |
|--------------------|-----------------|-------------------------------------------------------------------|------------------------------------|-------------------------------------------------------------------|------------------------------------|
| <i>AKT1</i>        | Akt1            | 0.386                                                             | 0                                  | 0.443                                                             | 0                                  |
| <i>AKT2</i>        | Akt2            | 0.248                                                             | 0.005                              | 0.217                                                             | 0                                  |
| <i>AKT3</i>        | Akt3            | 0.191                                                             | 0.031                              | 0.229                                                             | 0                                  |
| <i>BCL2</i>        | Bcl-2           | 0.024                                                             | 0.787                              | 0.811                                                             | 0                                  |
| <i>CAV1</i>        | Caveolin-1      | 0.586                                                             | 0                                  | 0.509                                                             | 0                                  |
| <i>CCNB1</i>       | Cyclin B1       | 0.792                                                             | 0                                  | 0.752                                                             | 0                                  |
| <i>CCND1</i>       | Cyclin D1       | 0.536                                                             | 0                                  | 0.626                                                             | 0                                  |
| <i>CCNE1</i>       | Cyclin E1       | 0.605                                                             | 0                                  | 0.822                                                             | 0                                  |
| <i>CDH1</i>        | E-Cadherin      | 0.041                                                             | 0.645                              | 0.572                                                             | 0                                  |
| <i>CDKN1B</i>      | p27             | 0.14                                                              | 0.114                              | 0.685                                                             | 0                                  |
| <i>COL6A1</i>      | Collagen VI     | 0.344                                                             | 0                                  | 0.202                                                             | 0                                  |
| <i>CTNNB1</i>      | beta-Catenin    | 0.116                                                             | 0.191                              | 0.22                                                              | 0                                  |
| <i>EGFR</i>        | EGFR            | 0.527                                                             | 0                                  | 0.52                                                              | 0                                  |
| <i>EIF4EBP1</i>    | 4EBP1           | 0.529                                                             | 0                                  | 0.702                                                             | 0                                  |
| <i>ERBB2</i>       | HER2            | 0.25                                                              | 0.004                              | 0.899                                                             | 0                                  |
| <i>ESR1</i>        | ER-alpha        | 0.863                                                             | 0                                  | 0.877                                                             | 0                                  |
| <i>GSK3A</i>       | GSK3-alpha      | 0.37                                                              | 0                                  | 0.006                                                             | 0.905                              |
| <i>GSK3B</i>       | GSK3-beta       | 0.371                                                             | 0                                  | -0.038                                                            | 0.453                              |
| <i>KDR</i>         | VEGFR2          | 0.006                                                             | 0.943                              | 0.342                                                             | 0                                  |
| <i>KIT</i>         | c-Kit           | 0.656                                                             | 0                                  | 0.735                                                             | 0                                  |
| <i>MAP2K1</i>      | MEK1            | 0.021                                                             | 0.812                              | 0.078                                                             | 0.121                              |
| <i>MAPK14</i>      | p38 MAPK        | 0.106                                                             | 0.232                              | 0.347                                                             | 0                                  |
| <i>MYC</i>         | c-Myc           | 0.394                                                             | 0                                  | 0.298                                                             | 0                                  |
| <i>PECAM1</i>      | CD31            | 0.227                                                             | 0.01                               | -0.07                                                             | 0.162                              |
| <i>PGR</i>         | PR              | 0.767                                                             | 0                                  | 0.827                                                             | 0                                  |
| <i>PIK3CA</i>      | PI3K-p110-alpha | -0.006                                                            | 0.942                              | 0.314                                                             | 0                                  |
| <i>PRKCA</i>       | PKC-alpha       | 0.411                                                             | 0                                  | 0.37                                                              | 0                                  |
| <i>PRKAA1</i>      | AMPK alpha      | 0.125                                                             | 0.161                              | 0.415                                                             | 0                                  |
| <i>PTEN</i>        | PTEN            | 0.22                                                              | 0.012                              | 0.248                                                             | 0                                  |
| <i>RPS6KB1</i>     | p70S6K          | 0.641                                                             | 0                                  | 0.723                                                             | 0                                  |
| <i>SRC</i>         | Src             | 0.039                                                             | 0.66                               | 0.468                                                             | 0                                  |
| <i>STMN1</i>       | Stathmin        | -0.064                                                            | 0.475                              | 0.05                                                              | 0.325                              |
| <i>TP53</i>        | p53             | 0.255                                                             | 0.004                              | 0.43                                                              | 0                                  |
| <i>TSC2</i>        | Tuberin         | 0.117                                                             | 0.188                              | 0.243                                                             | 0                                  |

DBCG predictions

*AKT1* (cor=0.386)

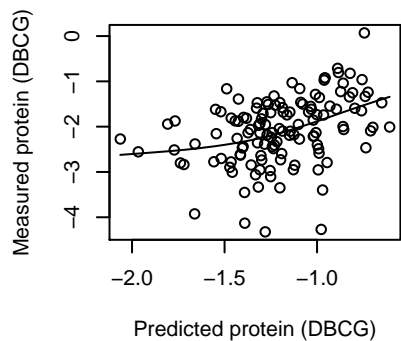

*AKT2* (cor=0.248)

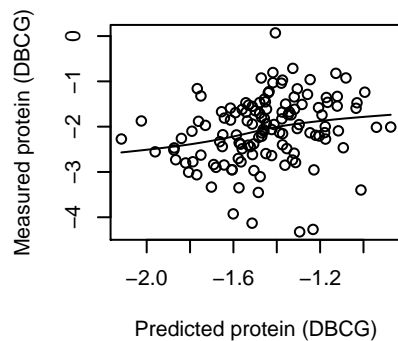

*AKT3* (cor=0.191)

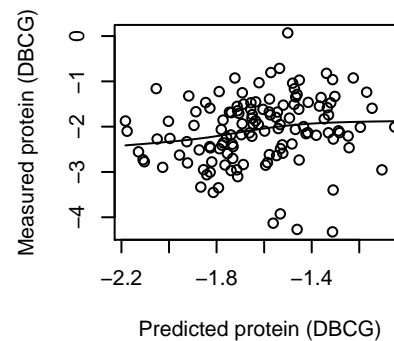

*BCL2* (cor=0.024)

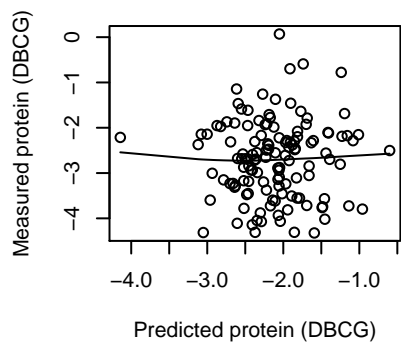

*CAV1* (cor=0.586)

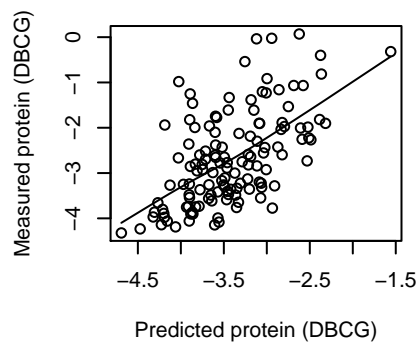

*CCNB1* (cor=0.792)

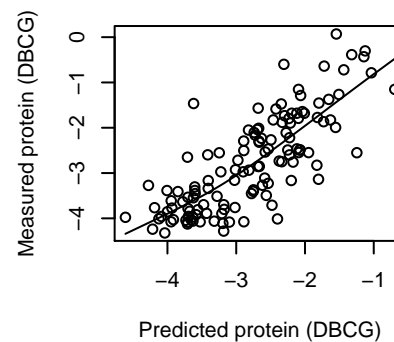

*CCND1* (cor=0.536)

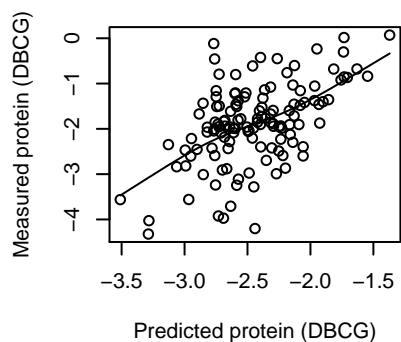

*CCNE1* (cor=0.605)

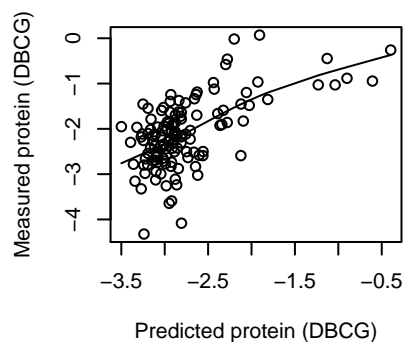

*CDH1* (cor=0.041)

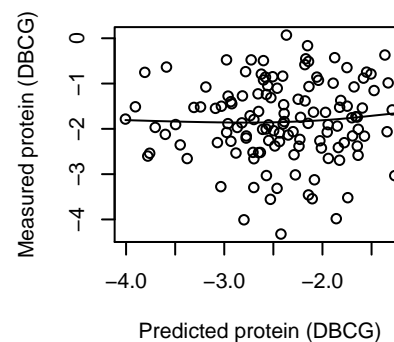

*CDKN1B* (cor=0.14)

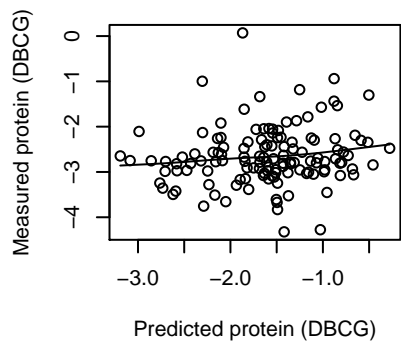

*COL6A1* (cor=0.344)

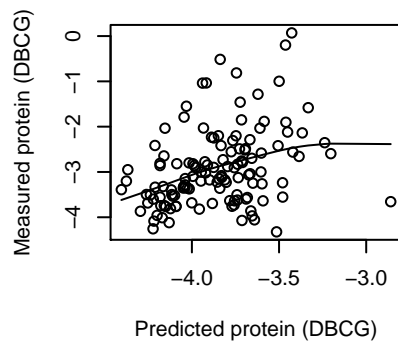

*CTNNB1* (cor=0.116)

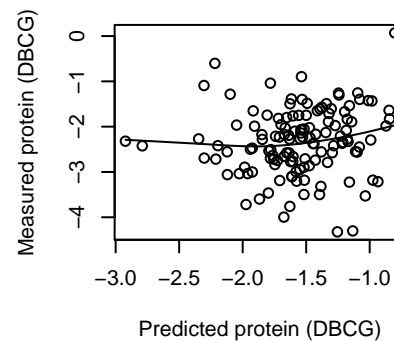

*EGFR* (cor=0.527)

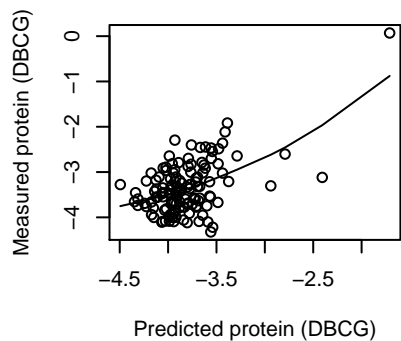

*EIF4EBP1* (cor=0.529)

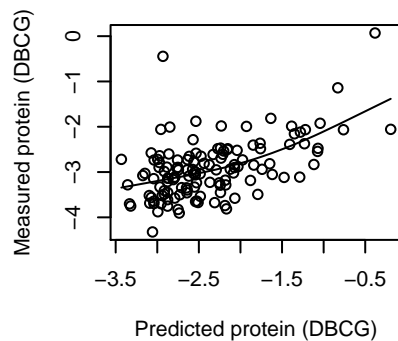

*ERBB2* (cor=0.25)

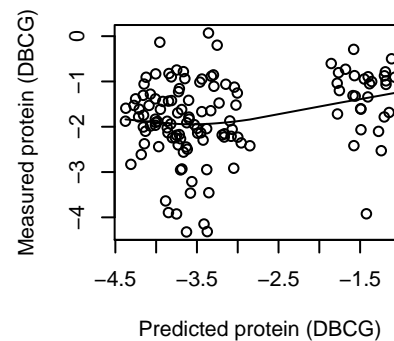

*ESR1* (cor=0.863)

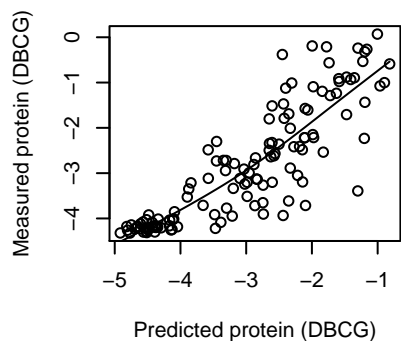

*GSK3A* (cor=0.37)

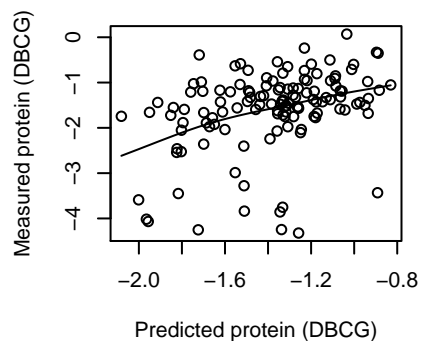

*GSK3B* (cor=0.371)

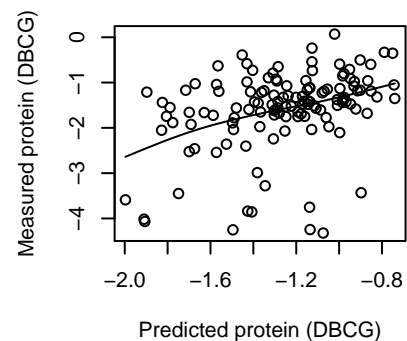

*KDR* (cor=0.006)

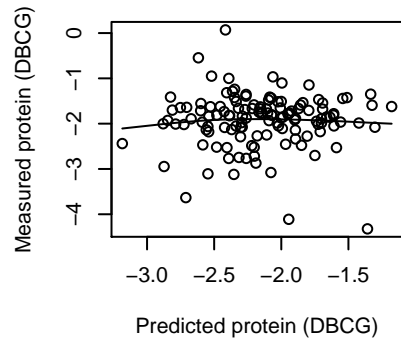

*KIT* (cor=0.656)

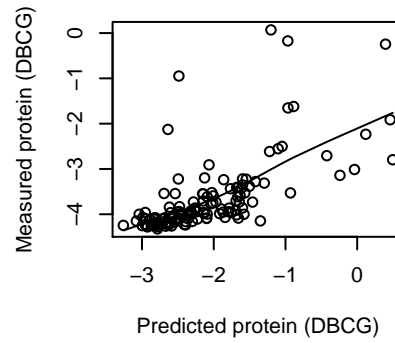

*MAP2K1* (cor=0.021)

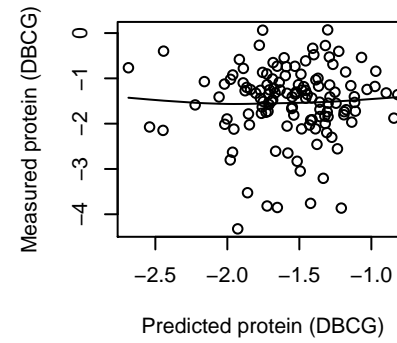

*MAPK14* (cor=0.106)

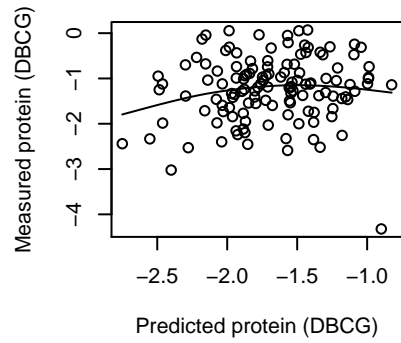

*MYC* (cor=0.394)

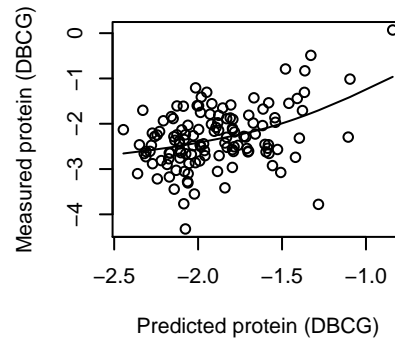

*PECAM1* (cor=0.227)

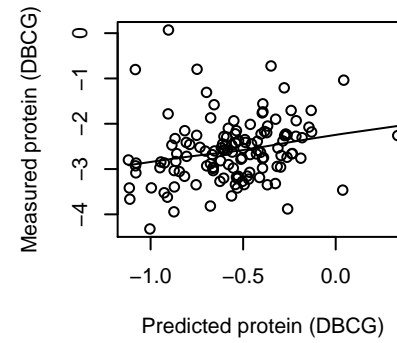

*PGR* (cor=0.767)

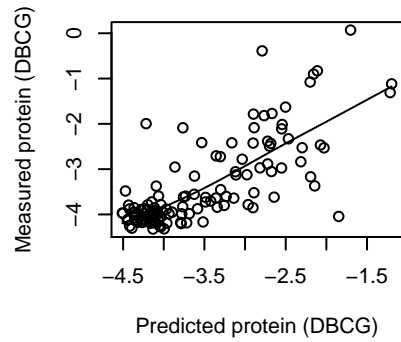

*PIK3CA* (cor=-0.006)

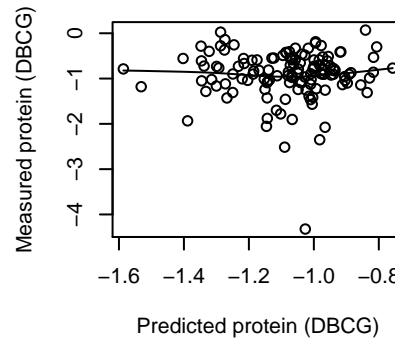

*PRKCA* (cor=0.411)

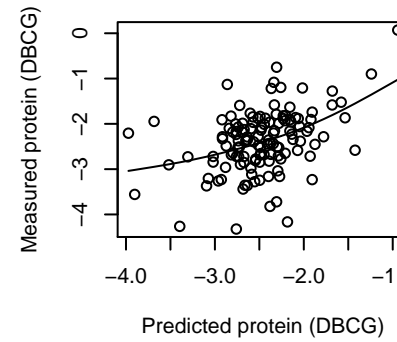

*PRKAA1* (cor=0.125)

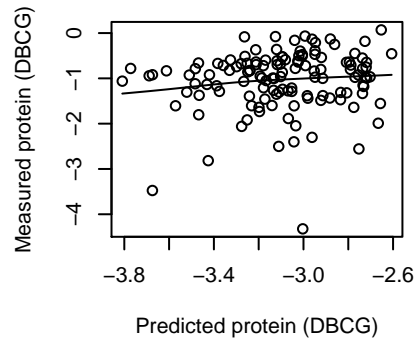

*PTEN* (cor=0.22)

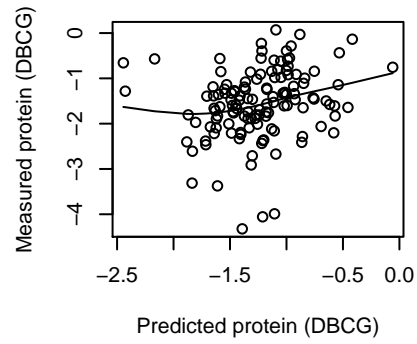

*RPS6KB1* (cor=0.641)

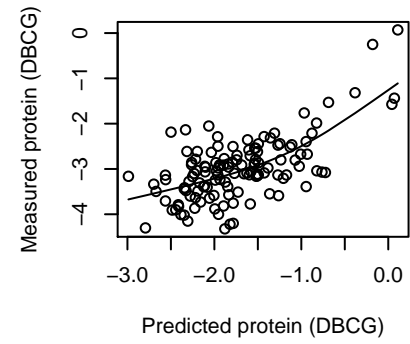

*SRC* (cor=0.039)

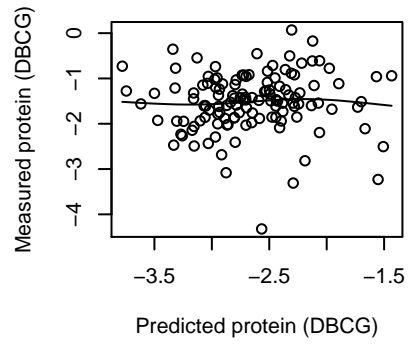

*STMN1* (cor=-0.064)

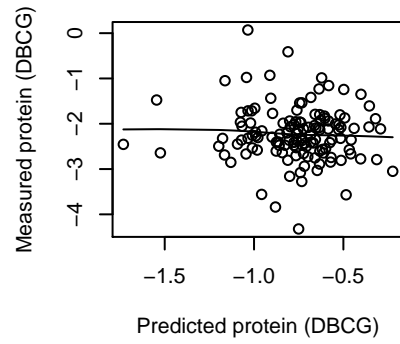

*TP53* (cor=0.255)

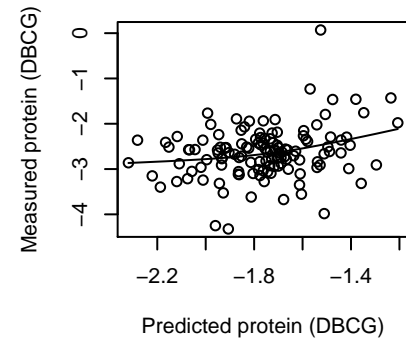

*TSC2* (cor=0.117)

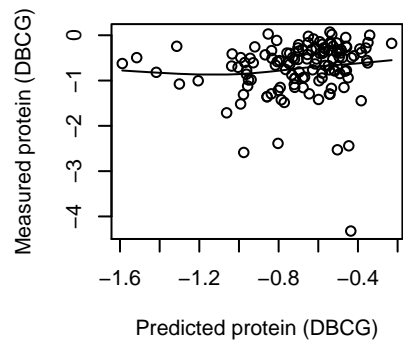

# TCGA predictions

*AKT1* (cor=0.443)

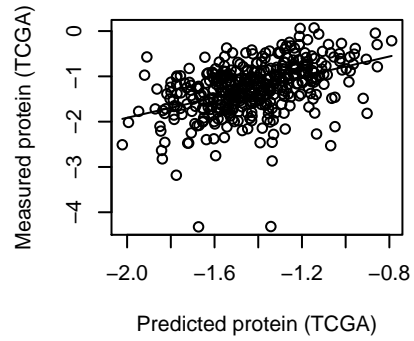

*AKT2* (cor=0.217)

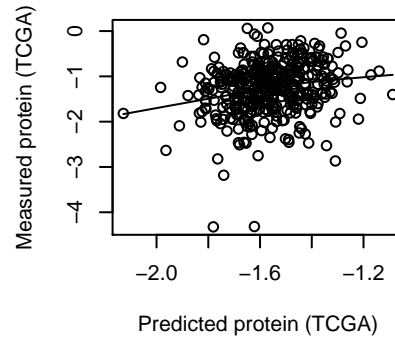

*AKT3* (cor=0.229)

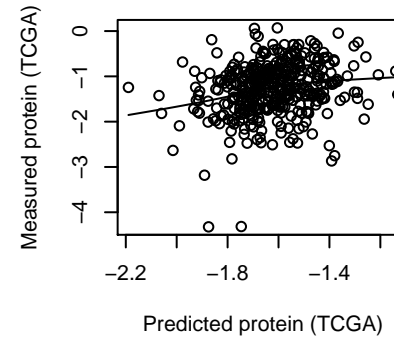

*BCL2* (cor=0.811)

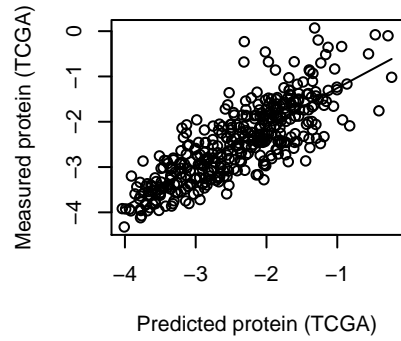

*CAV1* (cor=0.509)

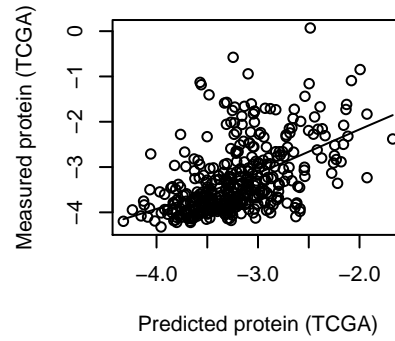

*CCNB1* (cor=0.752)

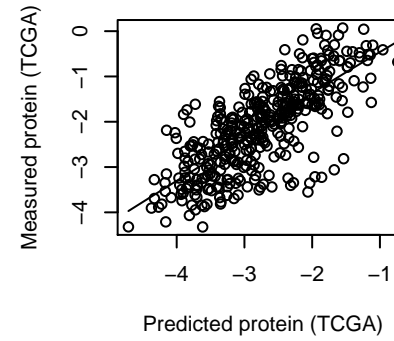

*CCND1* (cor=0.626)

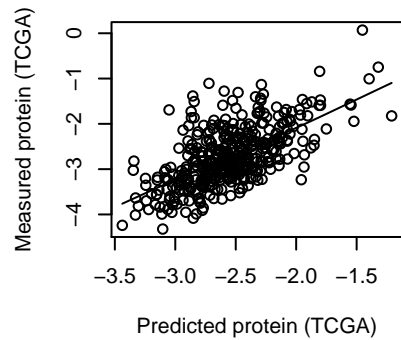

*CCNE1* (cor=0.822)

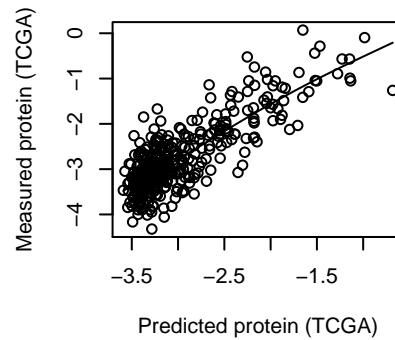

*CDH1* (cor=0.572)

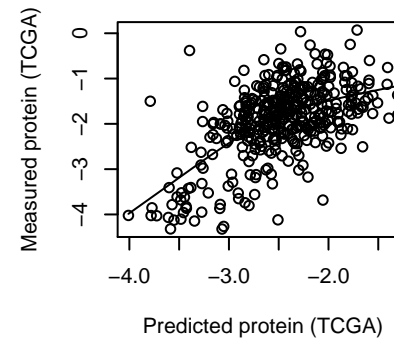



*CDKN1B* (cor=0.685)

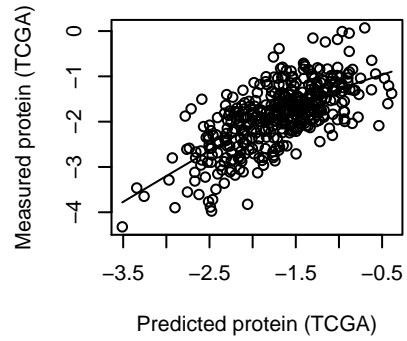

*COL6A1* (cor=0.202)

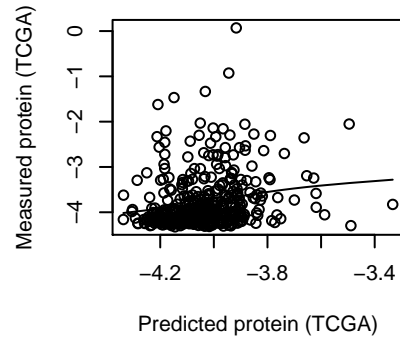

*CTNNB1* (cor=0.22)

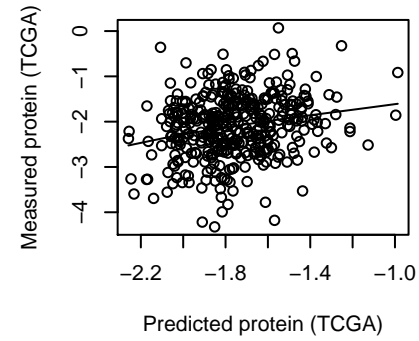

*EGFR* (cor=0.52)

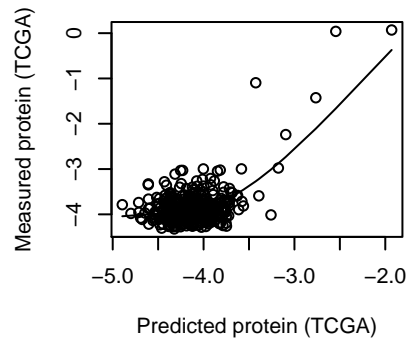

*EIF4EBP1* (cor=0.702)

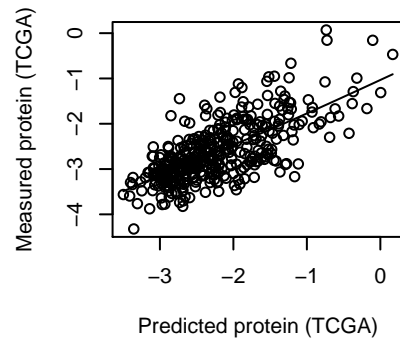

*ERBB2* (cor=0.899)

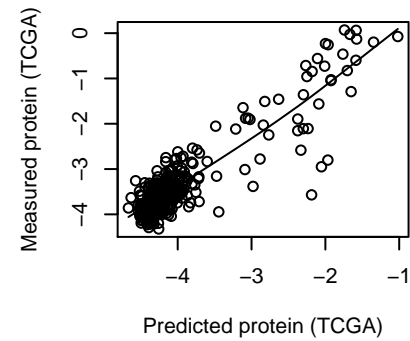

*ESR1* (cor=0.877)

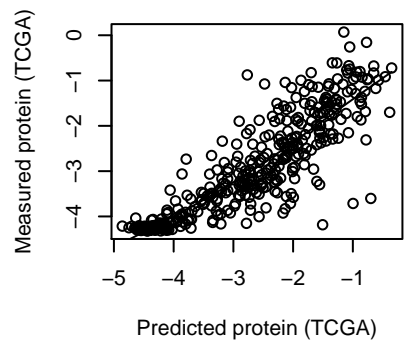

*GSK3A* (cor=0.006)

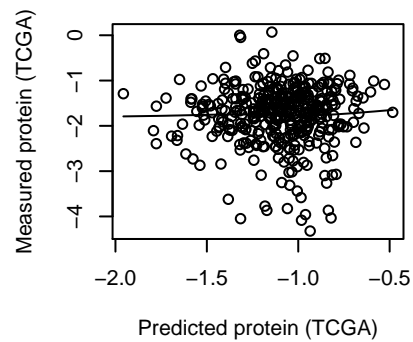

*GSK3B* (cor=-0.038)

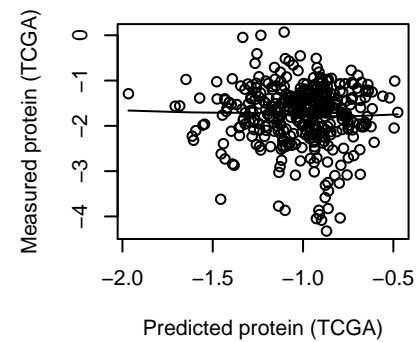

*KDR* (cor=0.342)

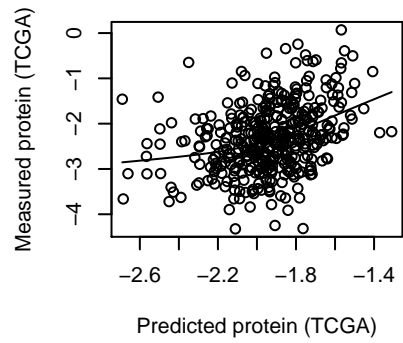

*KIT* (cor=0.735)

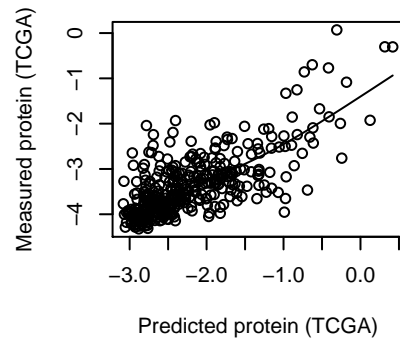

*MAP2K1* (cor=0.078)

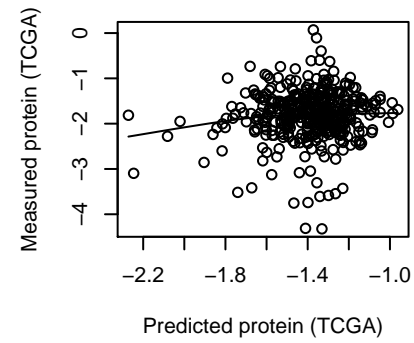

*MAPK14* (cor=0.347)

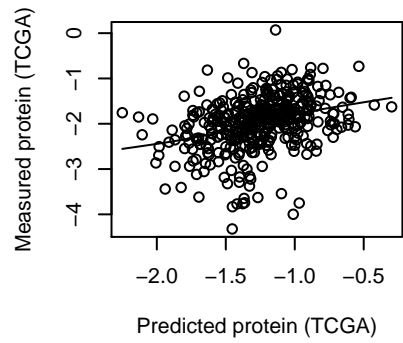

*MYC* (cor=0.298)

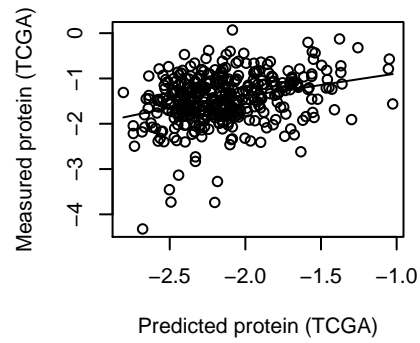

*PECAM1* (cor=-0.07)

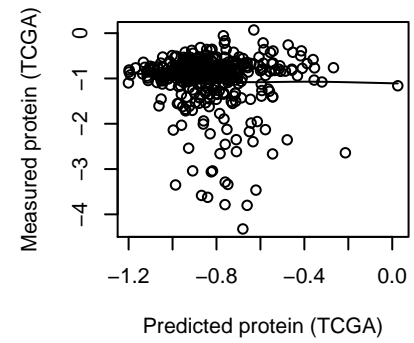

*PGR* (cor=0.827)

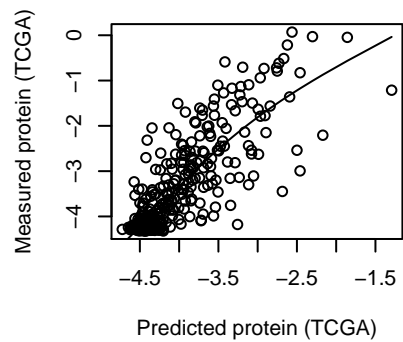

*PIK3CA* (cor=0.314)

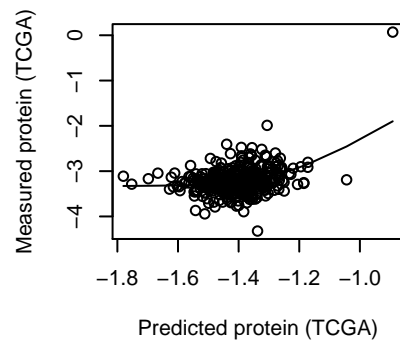

*PRKCA* (cor=0.37)

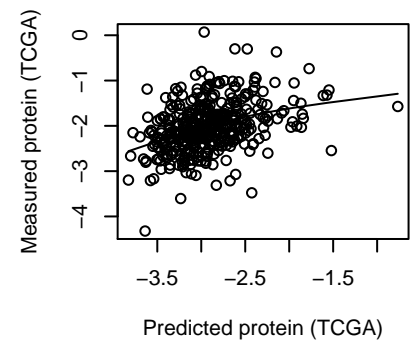

*PRKAA1* (cor=0.415)

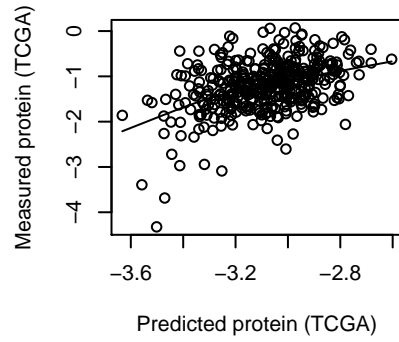

*PTEN* (cor=0.248)

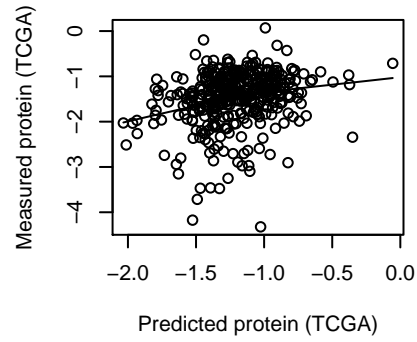

*RPS6KB1* (cor=0.723)

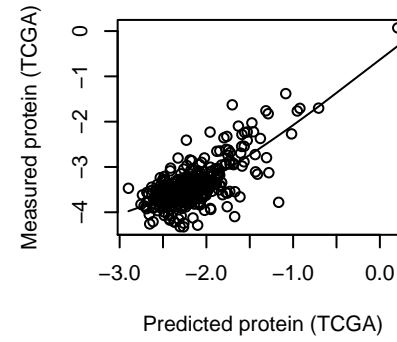

*SRC* (cor=0.468)

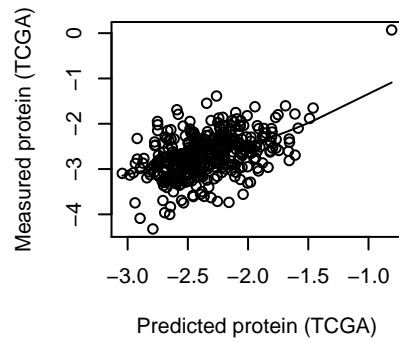

*STMN1* (cor=0.05)

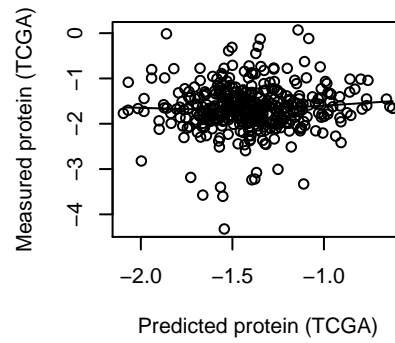

*TP53* (cor=0.43)

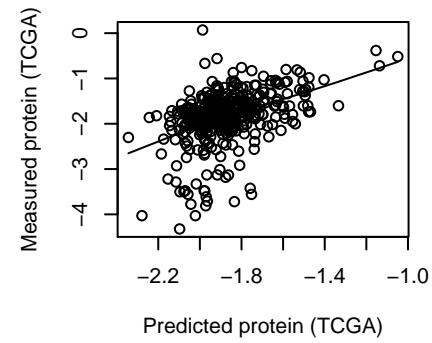

*TSC2* (cor=0.243)

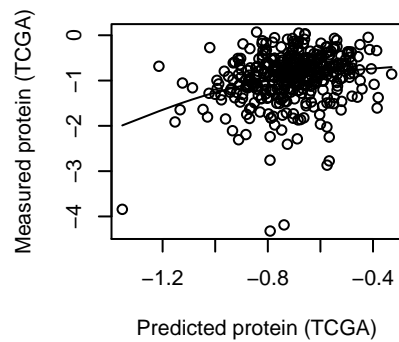

Supplement: 13073_2015_135_MOESM15_ESM.pdf [file 13073_2015_135_MOESM15_ESM.pdf]
