# Supplementary material for: Integrated analysis reveals microRNA networks coordinately expressed with key proteins in breast cancer
Source: PubMed Central journal article supplement (PMC4396592; doi:10.1186/s13073-015-0135-5), 2015-02-02
Supplement: 13073_2015_135_MOESM2_ESM.pdf [file 13073_2015_135_MOESM2_ESM.pdf]

# Assessing the effect of miRNAs on protein expression

- Oslo2 cohort (n = 283 tumors)
- Expression of 421 miRNAs
- Expression of 105 matched mRNAs and proteins

## Univariate modeling

Modeling the effect of individual miRNAs on protein expression

$$\log P = \alpha + \beta \log M_k + \gamma \log E + \epsilon$$

## Multivariate modeling

Modeling the joint effect of several miRNAs on protein expression

$$\log P = \alpha + \beta_1 \log M_1 + \dots + \beta_{421} \log M_{421} + \gamma \log E + \epsilon$$

Interactome map representing all direct and indirect associations between the expression of miRNA and proteins

Predicted patient-specific effect of all miRNAs combined on protein expression

Cell line functional assessment validating associations between miRNAs and proteins

Potentially direct miRNA-mRNA target interactions using *in silico* predictions

- Validation on two independent breast cancer data sets
- 348 miRNAs and 34 proteins overlapping
  - Comparison of estimated effects of miRNA on protein
  - Predicted vs. measured protein
