# Supplementary material for: Integrated analysis reveals microRNA networks coordinately expressed with key proteins in breast cancer
Source: PubMed Central journal article supplement (PMC4396592; doi:10.1186/s13073-015-0135-5), 2015-02-02

**A**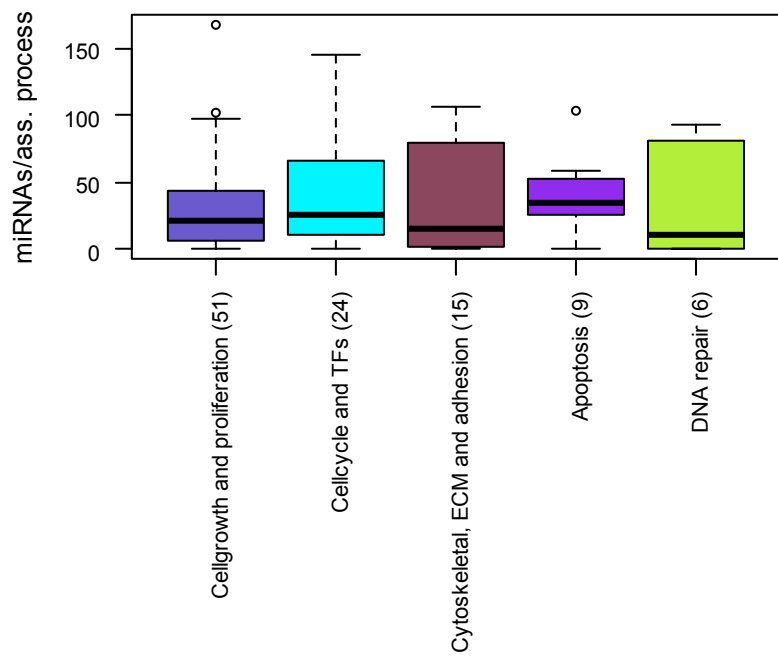**B**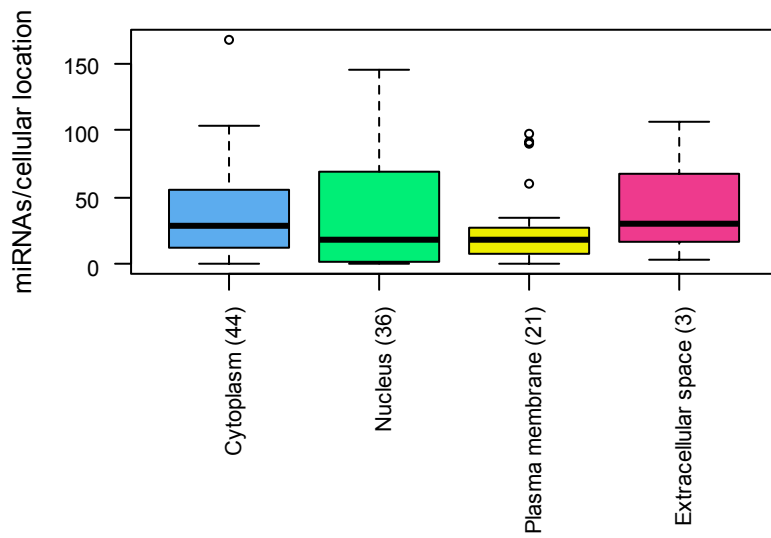**C**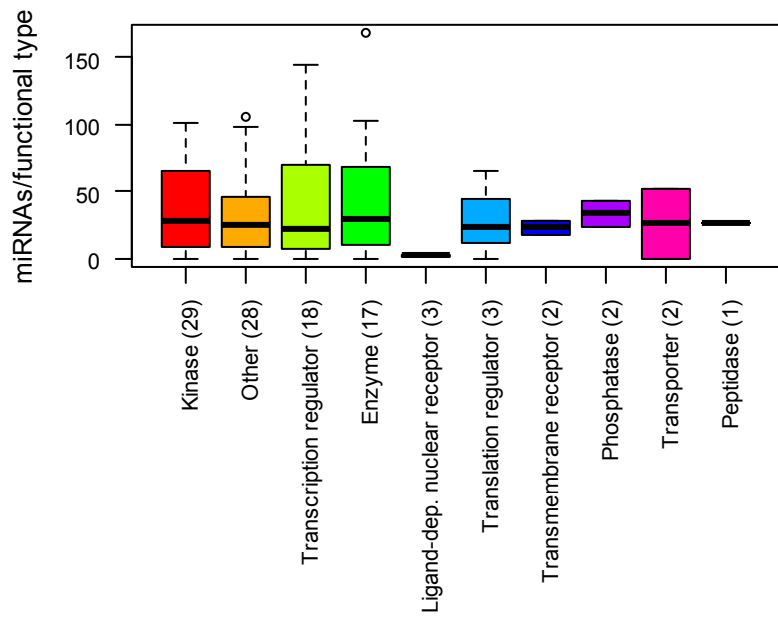**D**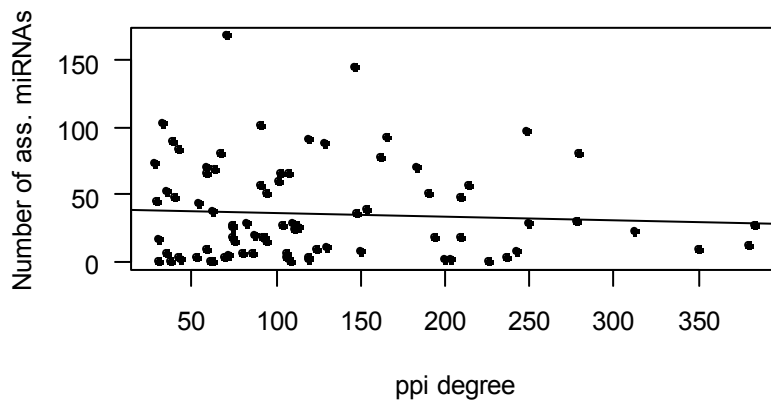

Supplement: 13073_2015_135_MOESM7_ESM.pdf [file 13073_2015_135_MOESM7_ESM.pdf]
