# Supplementary material for: Integrated analysis reveals microRNA networks coordinately expressed with key proteins in breast cancer
Source: PubMed Central journal article supplement (PMC4396592; doi:10.1186/s13073-015-0135-5), 2015-02-02
Supplement: 13073_2015_135_MOESM8_ESM.pdf [file 13073_2015_135_MOESM8_ESM.pdf]

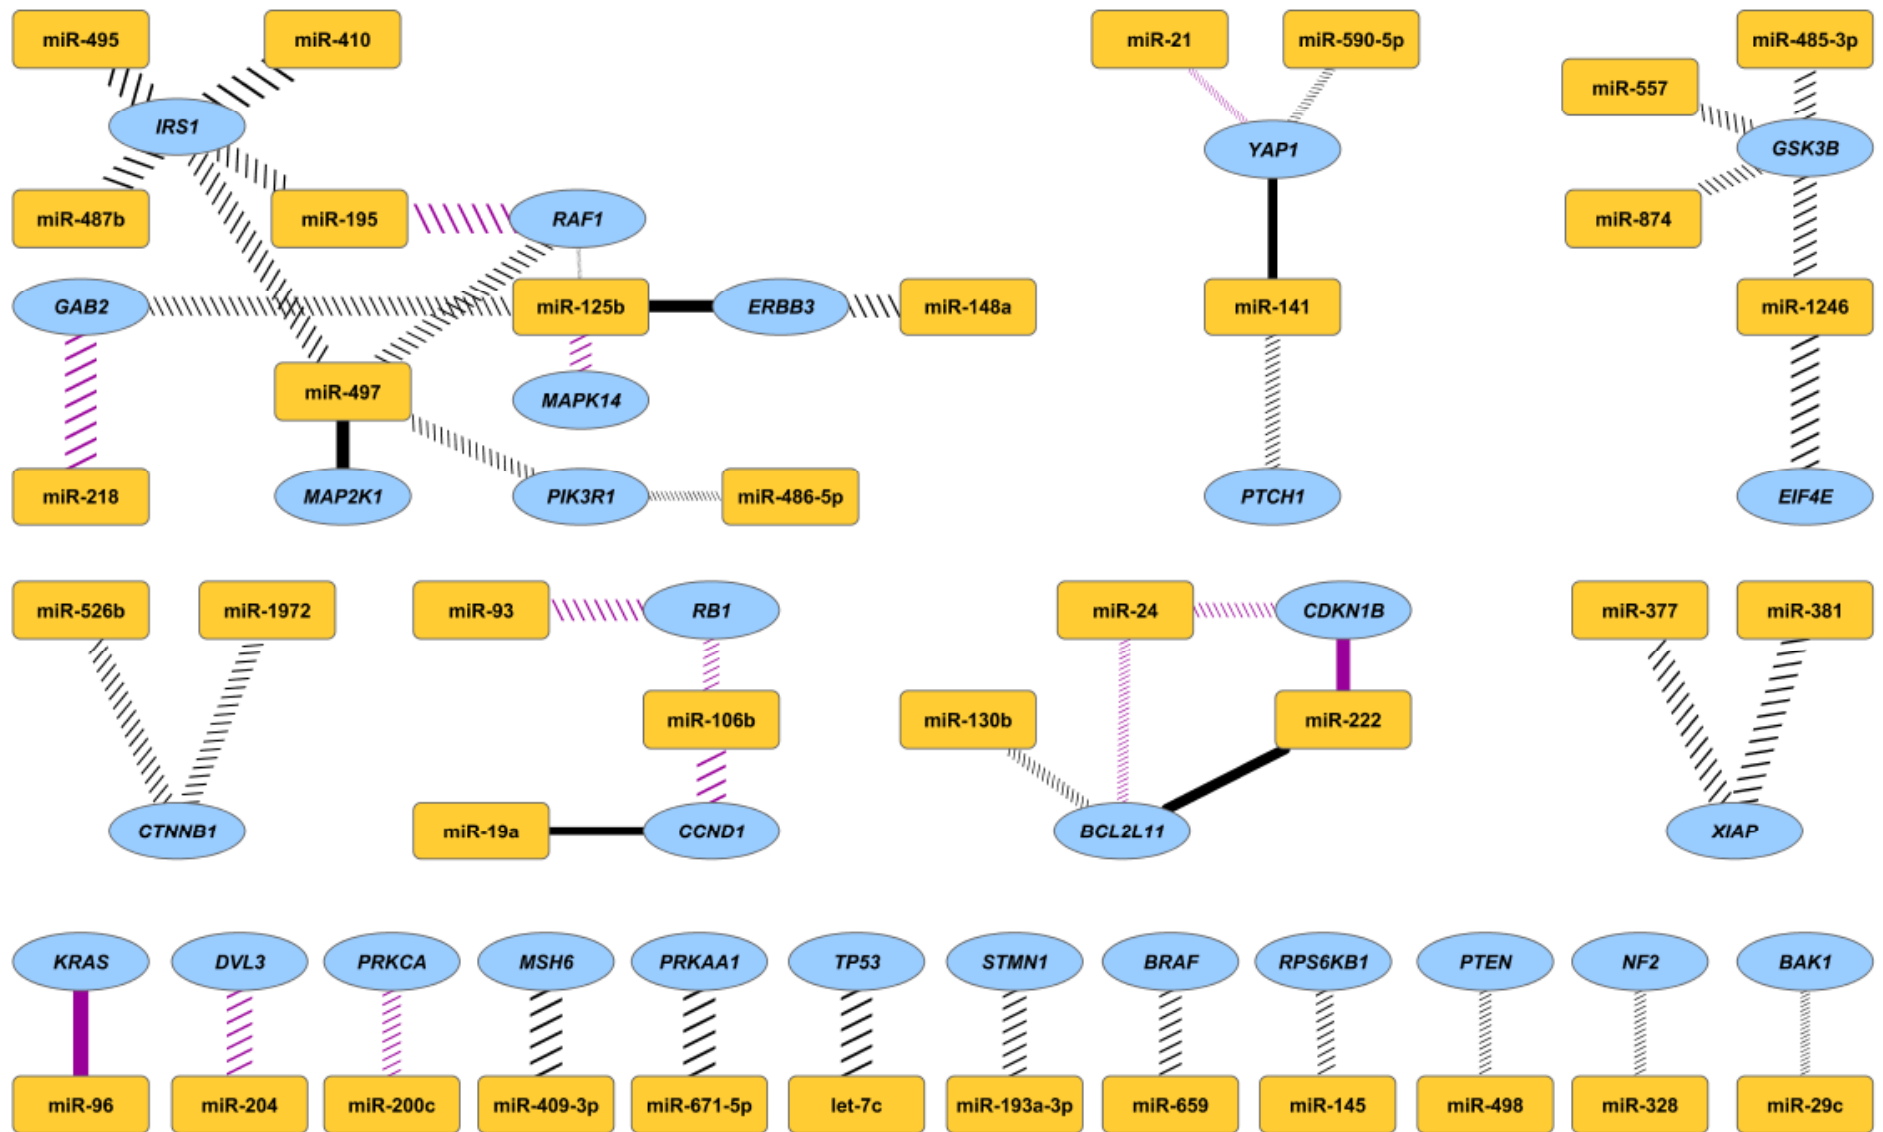

miRNA protein

Validated interaction

Potential direct interaction

Predicted by 2 out of 3 algorithms

Predicted by all algorithms
