# Supplementary material for: Integrated analysis reveals microRNA networks coordinately expressed with key proteins in breast cancer
Source: PubMed Central journal article supplement (PMC4396592; doi:10.1186/s13073-015-0135-5), 2015-02-02

**(i) Oslo2 vs. DBCG beta values**

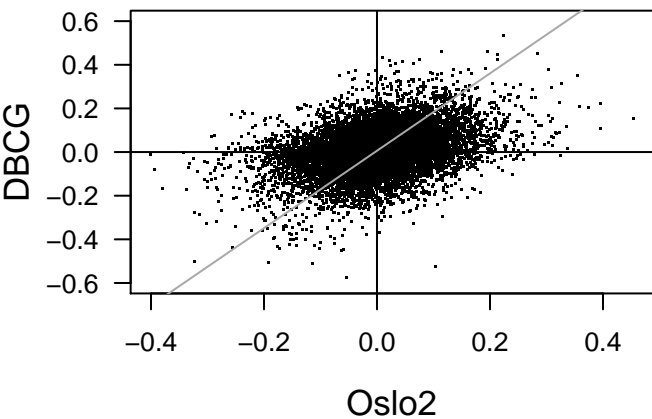

**(ii) Oslo2 vs. TCGA beta values**

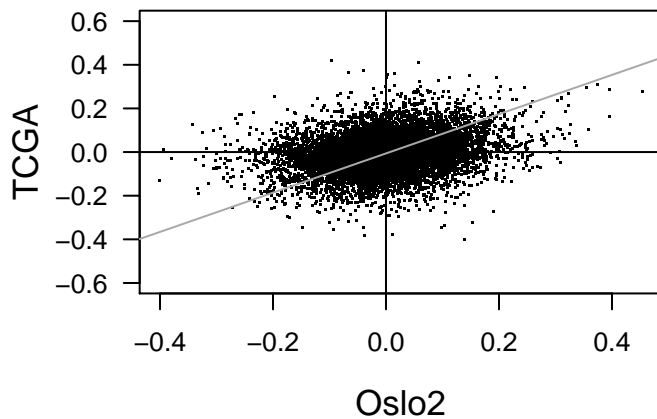

**(iii) Oslo2 vs. DBCG Z-scores (P-values)**

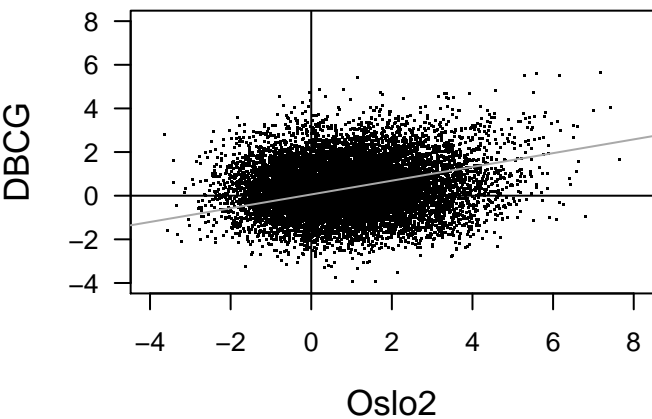

**(iv) Oslo2 vs. TCGA Z-scores (P-values)**

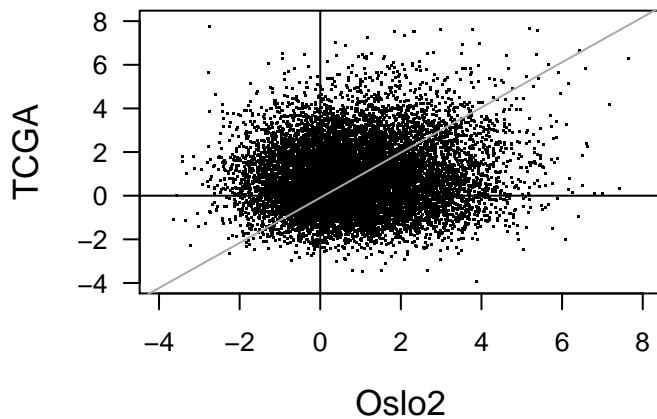

Supplement: 13073_2015_135_MOESM11_ESM.pdf [file 13073_2015_135_MOESM11_ESM.pdf]
